# Supplementary material
Source: PubMed Central journal article supplement (PMC6348470)
Supplement: NIHMS1007181-supplement-SI.pdf [file NIHMS1007181-supplement-SI.pdf]

# Self-Assembly of Supramolecular Fractals from Generation 1 to 5

Lei Wang,<sup>†,¶</sup> Ran Liu,<sup>‡,§,¶</sup> Jiali Gu,<sup>||</sup> Bo Song,<sup>†</sup> Heng Wang,<sup>†</sup> Xin Jiang,<sup>⊖</sup> Keren Zhang,<sup>§</sup> Xin Han,<sup>#</sup> Xin-Qi Hao,<sup>#</sup> Shi Bai,<sup>∇</sup> Ming Wang,<sup>\*,⊖</sup> Xiaohong Li,<sup>\*,||</sup> Bingqian Xu,<sup>\*,§</sup> and Xiaopeng Li<sup>\*,†</sup>

<sup>†</sup>Department of Chemistry, University of South Florida, Tampa, Florida 33620, United States

<sup>‡</sup>Shandong Province Key Laboratory of Medical Physics and Image Processing Technology, School of Physics and Electronics, Shandong Normal University, Jinan 250358, China

<sup>§</sup>Single Molecule Study Laboratory, College of Engineering and Nanoscale Science and Engineering Center, University of Georgia, Athens, Georgia 30602, United States

<sup>||</sup>College of Chemistry, Chemical Engineering and Materials Science, Soochow University, Suzhou 215123, China

<sup>⊖</sup>State Key Laboratory of Supramolecular Structure and Materials, College of Chemistry, Jilin University, Changchun, Jilin 130012, China

<sup>#</sup>College of Chemistry and Molecular Engineering, Zhengzhou University, Zhengzhou, Henan 450001, China

<sup>∇</sup>Department of Chemistry and Biochemistry, University of Delaware, Newark, Delaware 19716, United States

# Table of Contents

|                                                                                          |      |
|------------------------------------------------------------------------------------------|------|
| <b>1. Experimental section</b> .....                                                     | S3   |
| <b>2. Attempts to obtain LB, LC, and LE</b> .....                                        | S5   |
| <b>3. Synthetic route to LA-LE</b> .....                                                 | S6   |
| <b>4. Synthesis of ligands and complexes.</b> .....                                      | S12  |
| <b>5. ESI-MS spectra data of ligand LA-LE and complexes G1-G5.</b> .....                 | S45  |
| <b>6. <sup>1</sup>H NMR, <sup>13</sup>C NMR, 2D COSY NMR, 2D NOESY NMR spectra</b> ..... | S53  |
| <b>7. Experimental diffusion coefficient and hydrodynamic radius</b> .....               | S101 |
| <b>8. TEM and STM images</b> .....                                                       | S102 |
| <b>9. UV-Vis and CV spectra</b> .....                                                    | S104 |
| <b>10. Reference:</b> .....                                                              | S105 |

## 1. Experimental section

**General Procedures.** All reagents were purchased from Sigma-Aldrich, Matrix Scientific, Fisher Scientific, Oakwood Chemicals, and used without further purification. Column chromatography was conducted using neutral Al<sub>2</sub>O<sub>3</sub> (Brockman I, 50-200 μm, 60 Å) or SiO<sub>2</sub> (VWR, 40-60 μm, 60 Å) and the separated products were visualized by UV light or testified by ESI-MS. <sup>1</sup>H NMR and <sup>13</sup>C NMR spectral data of the organic intermediates and **LA**, <sup>13</sup>C NMR spectral data of **LB**, **LC** and **LE** were recorded on a Bruker BioSpin GmbH 400-MHz (probe: Z104450\_0395 (PA BBO 400S1 BBF-H-D-05 Z)), Varian 500-MHz (probe: ColdProbe\_TR\_Z\_MR1007\_3900B-12). <sup>1</sup>H NMR, 2D NMR and <sup>13</sup>C NMR spectral data of the metallic organic intermediates and the supramolecular complexes **G1-G5**, <sup>1</sup>H NMR, 2D NMR of the ligands (**LB-LE**), <sup>13</sup>C NMR spectral data of **LD** were recorded on a Varian 500-MHz (probe: ColdProbe\_TR\_Z\_MR1007\_3900B-12) spectrometer. DOSY NMR spectral data of the complexes **G1-G5** were recorded on a Varian 600-MHz spectrometer. ESI-MS was conducted on Waters Synapt G2 mass spectrometer with traveling wave ion mobility. The IM-MS experiments for complexes were performed under the following conditions: ESI capillary voltage, 3.0 kV; sample cone voltage, 15 V; extraction cone voltage, 0.5 V; source temperature 100 °C; desolvation temperature, 100 °C; cone gas flow, 10 L/h; desolvation gas flow, 700 L/h (N<sub>2</sub>); source gas control, 0 mL/min; trap gas control, 2 mL/min; Helium cell gas control, 100 mL/min; ion mobility (IM) cell gas control, 30 mL/min; sample flow rate, 5 μL/min; IM traveling wave height, 25 V; and IM traveling wave velocity, 1000 m/s. Electronic absorption experiments were conducted on a HORIBA FLUOROMAX-4C-L.

**CV:** Cyclic voltammetry measurements were performed on a WaveDrive 10 potentiostat with a standard three-electrode configuration using a platinum button working electrode, a platinum flag counter electrode and a saturated calomel electrode reference electrode. The electrochemical properties of these five complexes in DMF (10<sup>-5</sup> M) were studied in a three-electrode electrochemical cell with Bu<sub>4</sub>NPF<sub>6</sub> (0.1 M) as electrolyte.

**Molecular model:** Energy minimization of the macrocycles was conducted with Materials Studio version 4.2, using the Anneal and Geometry Optimization tasks in the Forcite module (Accelrys Software, Inc.). All counterions and alkyl chain were omitted. Geometry optimization used a

universal force field with atom-based summation and cubic spline truncation for both the electrostatic and Van der Waals parameters.

**TEM:** The sample solutions (0.5 mg/mL in DMF) were drop cast on copper grids (carbon coated 400 mesh Cu grids purchased from [www.2spi.com](http://www.2spi.com)) and the extra solution was absorbed by filter paper to avoid aggregation. The grid was then washed with three drops of methanol to remove DMF. The nanostructures were formed by diffusing THF into the sample solution (5.0 mg/mL in DMF) slowly and the mixture were drop cast on copper grids directly. The TEM images were all taken with a FEI Morgagni transmission electron microscope.

**STM:** The sample solution (0.2 mg/mL in DMSO) was dropped on freshly cleaved HOPG surface. After 30 seconds, the surface was washed slightly with water for three times and spin-coated for 30 minutes to make sure that the molecules were uniformly distributed on the HOPG surface dried in room temperature. The STM images were taken with a PicoPlus SPM system with a PicoScan 3000 Controller. The obtained STM images were processed by WSxM software.



## 2. Attempts to obtain LB, LC, and LE

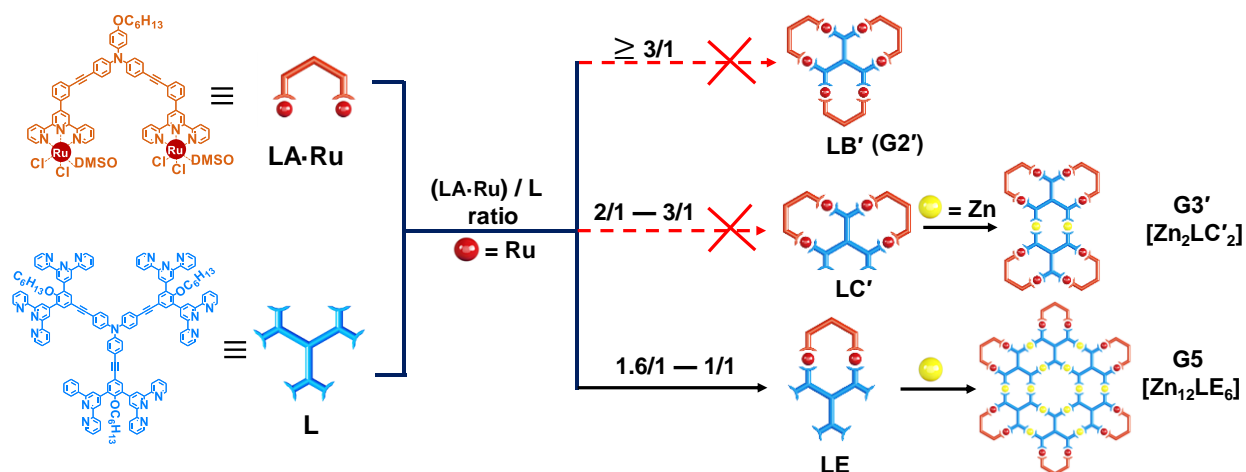

Figure S1. Initial end-capping strategy of approach 2.

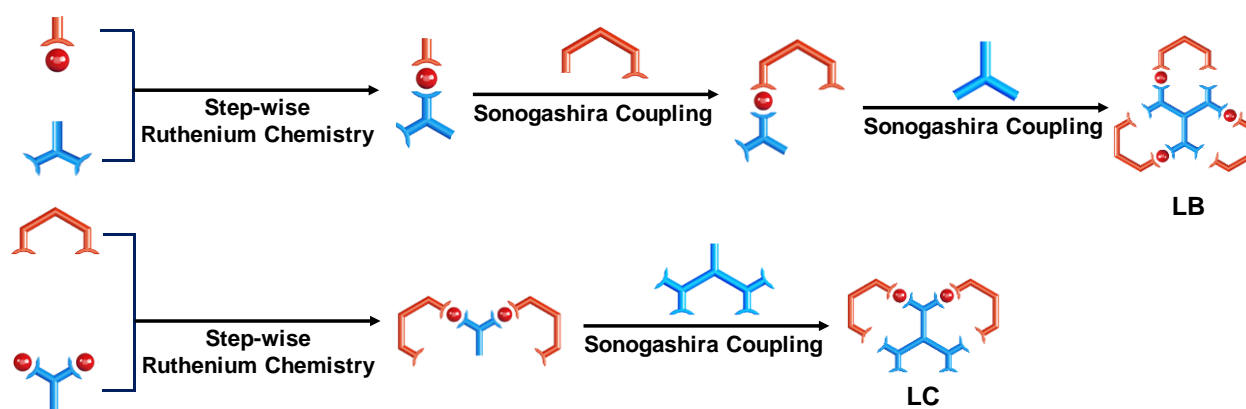

Figure S2. Combination of Ru(II) connectivity and Sonogashira coupling in approach 3.

### 3. Synthetic route to LA-LE

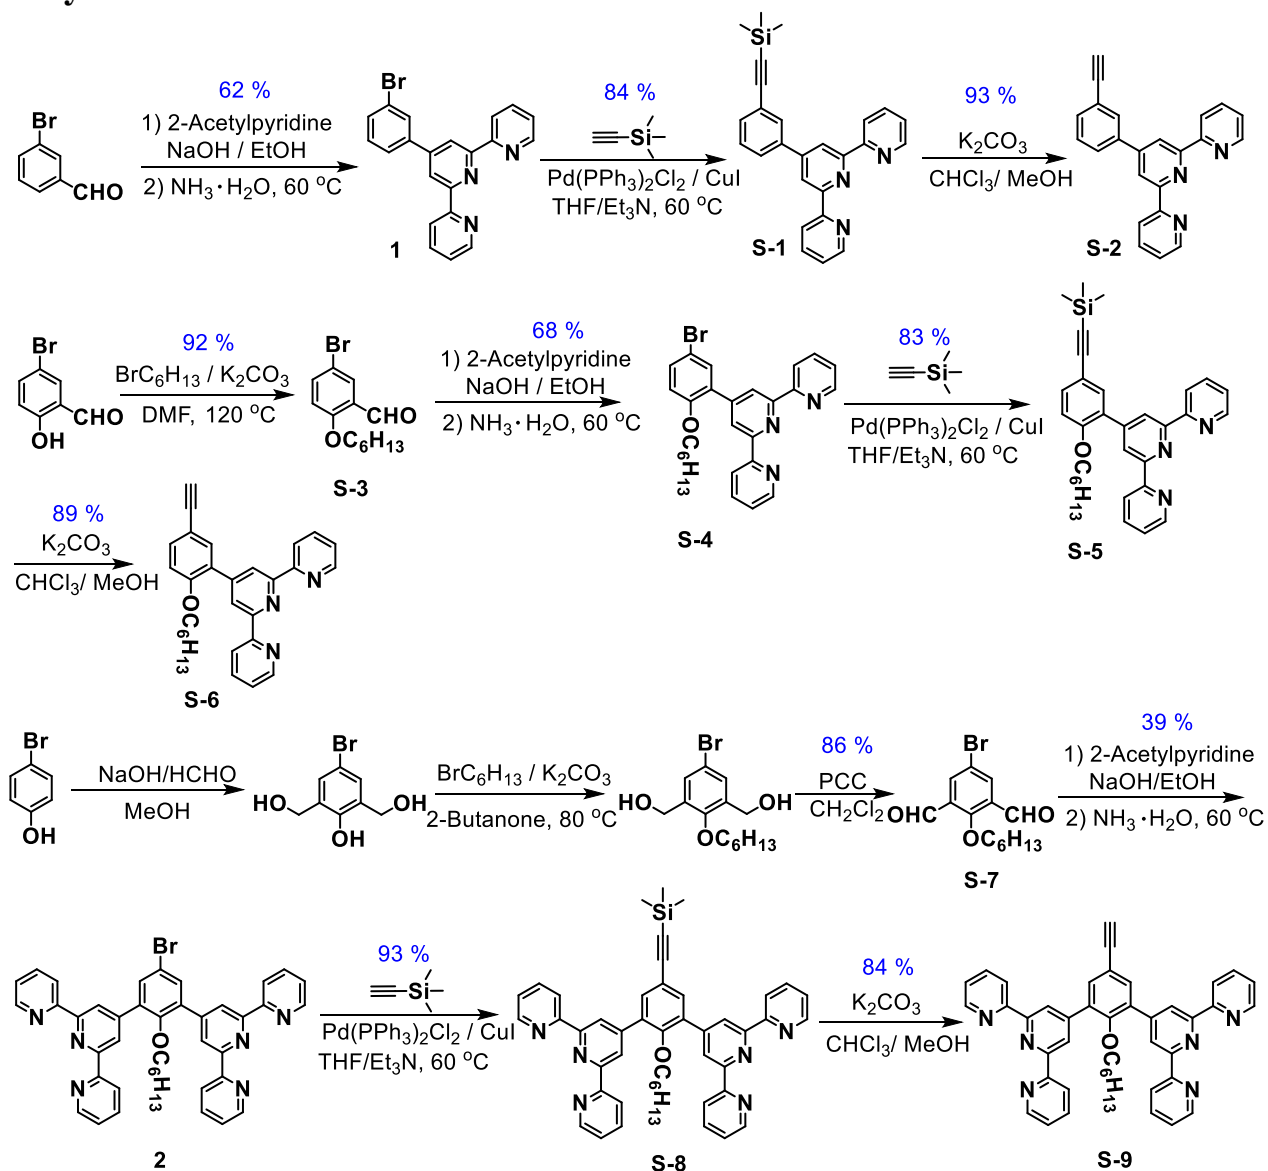

Scheme S1. Synthesis of terpyridine precursors.

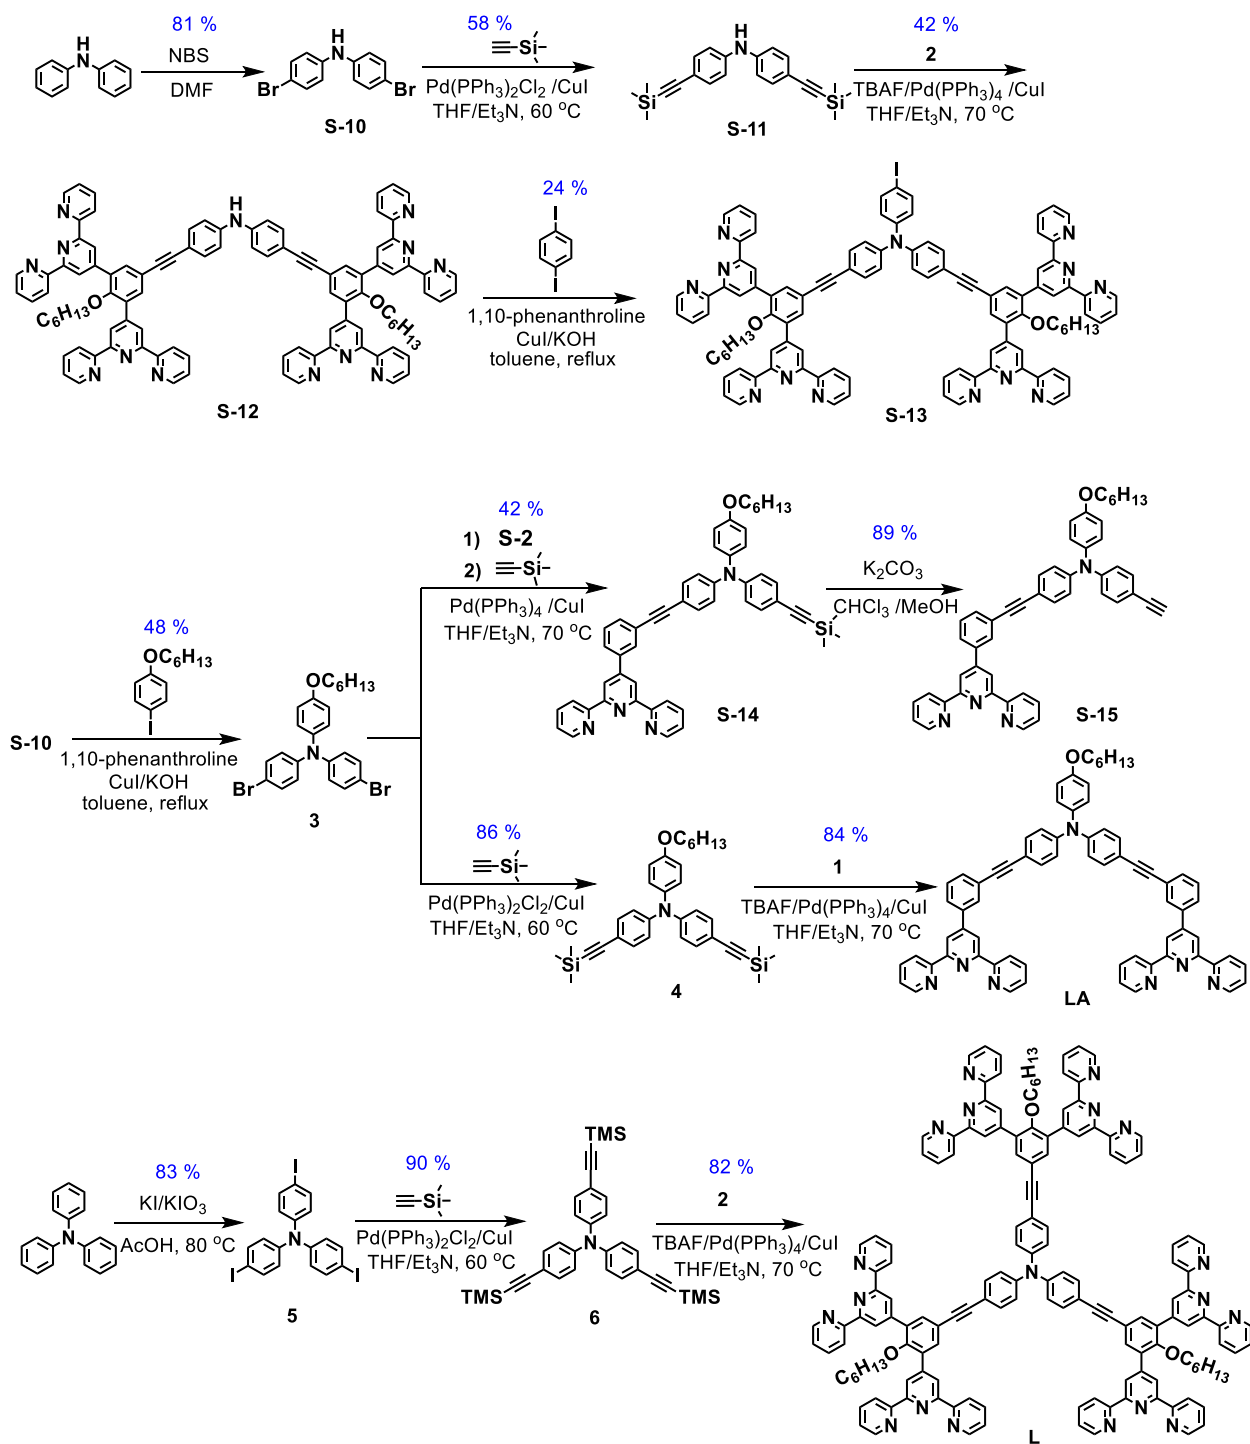

Scheme S2. Synthesis of LA and L.

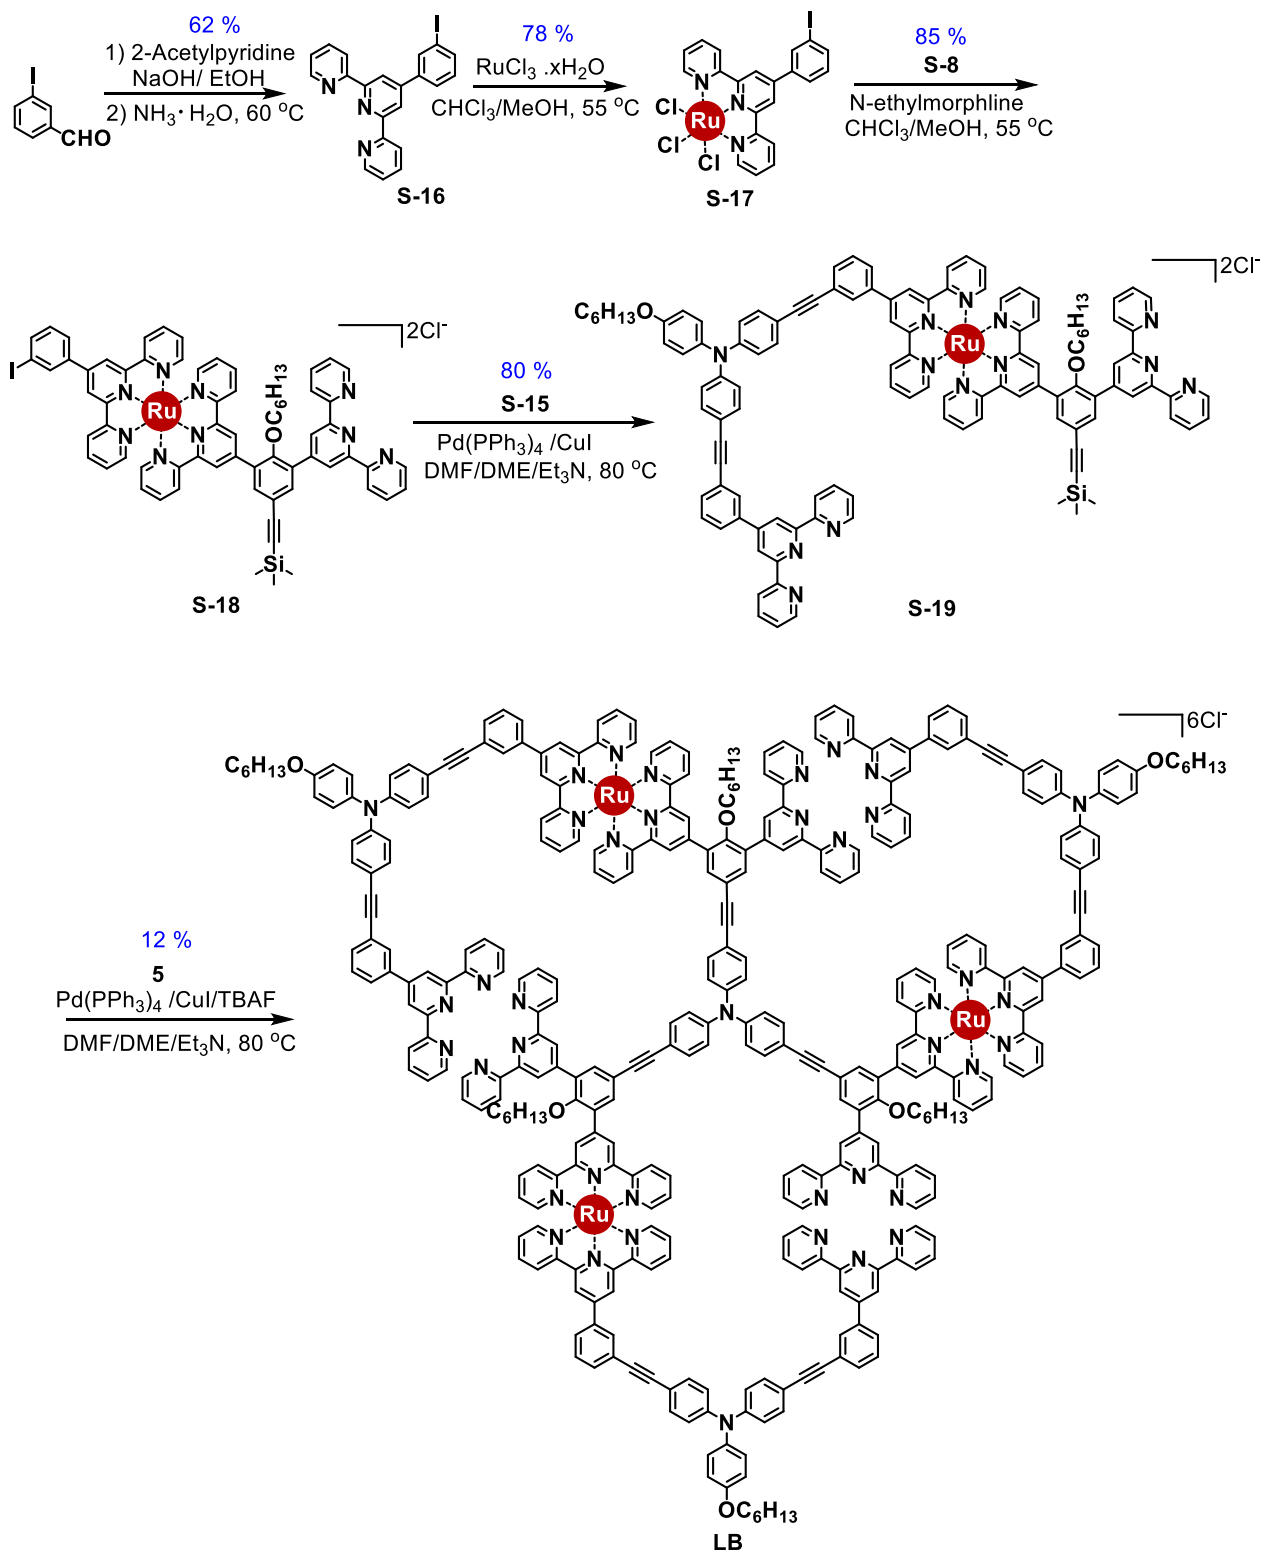

Scheme S3. Synthesis of LB.

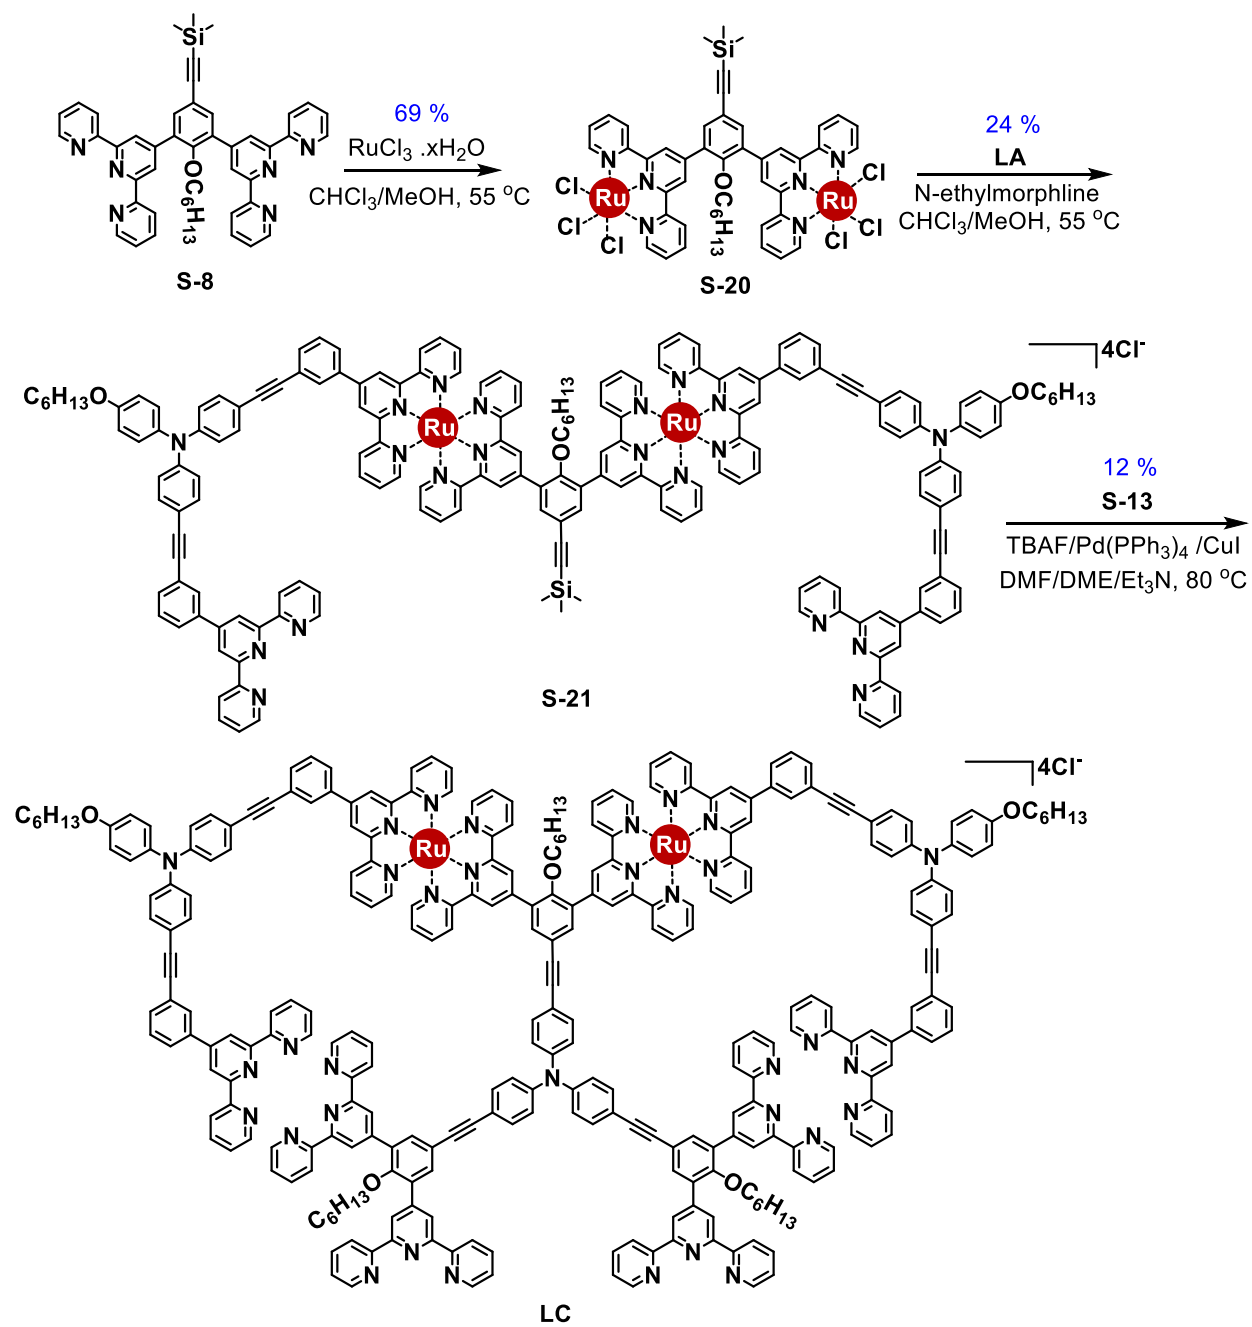

Scheme S4. Synthesis of LC.

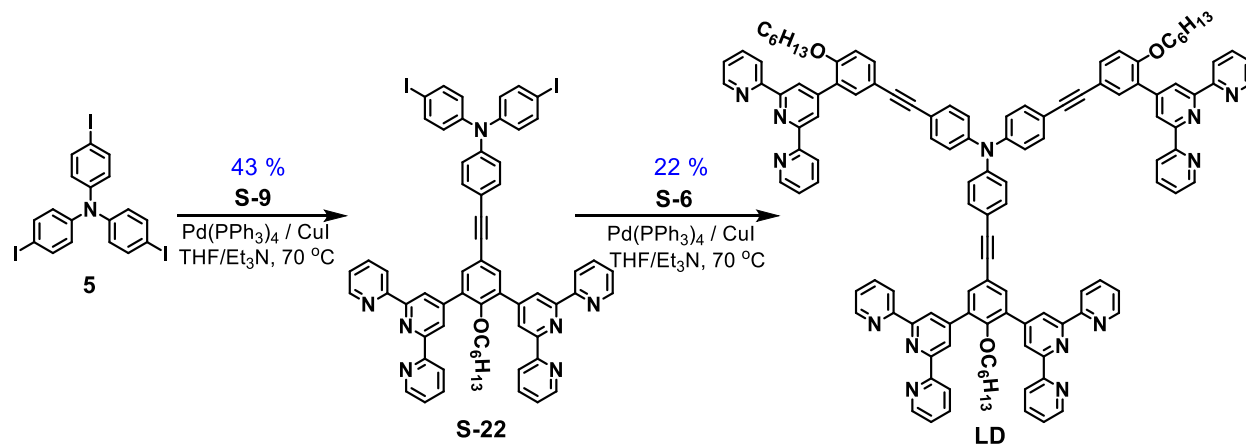

**Scheme S5.** Synthesis of **LD**.

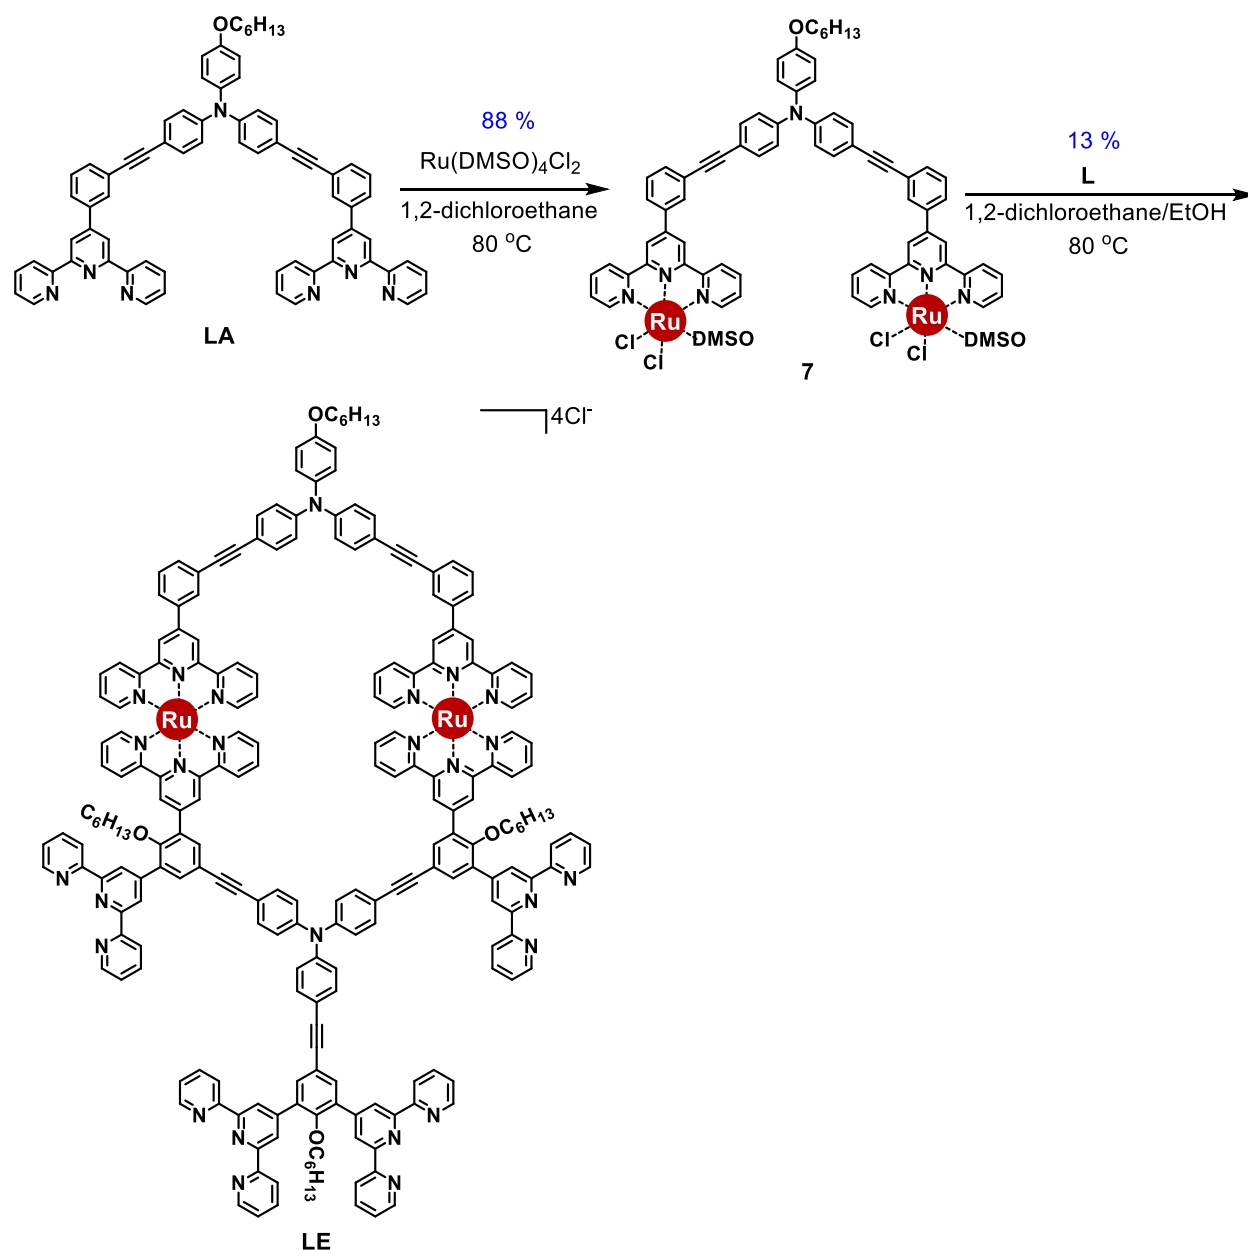

Scheme S6. Synthesis of LE.

#### 4. Synthesis of ligands and complexes.

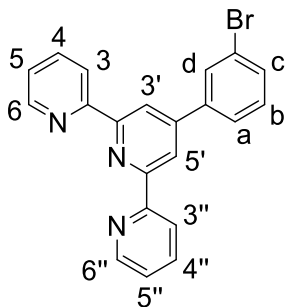

Compound **1**. Compound **1** was synthesized according to a literature method.<sup>1</sup> To a flask containing NaOH (4.8 g, 120 mmol) in EtOH (150 mL), 3-bromobenzaldehyde (3.7 g, 20 mmol) and 2-acetylpyridine (5.3 g, 44 mmol) were subsequently added. After stirring at room temperature overnight, aqueous NH<sub>3</sub>•H<sub>2</sub>O (37 %, 150 mL) was added and the mixture was heated at 60 °C overnight. After cooling down to room temperature, the precipitate was filtered under vacuum and washed with ethanol to give **1** as a white powder (4.8 g, 62 % yield). <sup>1</sup>H NMR (500 MHz, CDCl<sub>3</sub>, 300 K) δ 8.73 (s, 2H, tpy-*H*<sup>3',5'</sup>), 8.69-8.62 (m, 4H, tpy-*H*<sup>6,6''</sup>, tpy-*H*<sup>3,3''</sup>), 8.04 (s, 1H, Ph-*H*<sup>d</sup>), 7.90-7.88 (m, 2H, tpy-*H*<sup>4,4''</sup>), 7.81 (d, *J* = 7.9 Hz, 1H, Ph-*H*<sup>a</sup>), 7.58 (d, *J* = 8.1 Hz, 1H, Ph-*H*<sup>c</sup>), 7.41-7.36 (m, 3H, tpy-*H*<sup>5,5''</sup>, Ph-*H*<sup>b</sup>). <sup>13</sup>C NMR (125 MHz, CDCl<sub>3</sub>, 300 K) δ 156.06, 155.96, 149.13, 148.83, 140.64, 136.89, 131.92, 130.42, 126.00, 123.94, 123.10, 121.36, 118.77. ESI-TOF (*m/z*): Calcd. [C<sub>21</sub>H<sub>14</sub>BrN<sub>3</sub> + H]<sup>+</sup> for: 388.04, found: 388.02.

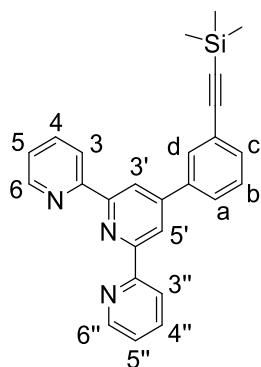

Compound **S-1**. Compound **S-1** was synthesized according to a literature method.<sup>2</sup> A mixture of compound **1** (3.9 g, 10.0 mmol), Pd(PPh<sub>3</sub>)<sub>2</sub>Cl<sub>2</sub> (250 mg, 0.35 mmol) and copper(I) iodide (53 mg, 0.28 mmol) was degassed under nitrogen for three times. After that, 30 mL anhydrous THF, 45 mL anhydrous Et<sub>3</sub>N and ethynyltrimethylsilane (2.5 mL, 18 mmol) was added and then the mixture was stirred at 60 °C overnight. After cooling down to room temperature, solvent was removed, and



the residue was extracted with  $\text{CHCl}_3$ . The combined organic phase was washed with brine and dried over  $\text{Na}_2\text{SO}_4$ . After removal of solvent under vacuum, the residue was purified by column chromatography on silica gel with chloroform: ethanol (100:1) as eluent to afford a white solid (3.4 g, 84 % yield).  $^1\text{H}$  NMR (400 MHz,  $\text{CDCl}_3$ , 300 K)  $\delta$  8.76 – 8.73 (m, 2H, tpy- $H^{6,6''}$ )  $\delta$  8.74 (s, 2H, tpy- $H^{3,5'}$ ), 8.68 (dq,  $J = 8.0, 1.3$  Hz, 2H, tpy- $H^{3,3''}$ ), 8.02 (s, 1H, Ph- $H^d$ ), 7.93-7.80 (m, 3H, tpy- $H^{4,4''}$ , Ph- $H^a$ ), 7.55 (dt,  $J = 7.7, 1.4$  Hz, 1H, Ph- $H^c$ ), 7.50 – 7.42 (m, 1H, Ph- $H^b$ ), 7.39 – 7.33 (m, 2H, tpy- $H^{5,5''}$ ), 0.29 (s, 9H).  $^{13}\text{C}$  NMR (100 MHz,  $\text{CDCl}_3$ , 300 K)  $\delta$  156.09, 155.97, 149.52, 149.12, 138.63, 136.91, 132.35, 130.81, 128.84, 127.45, 123.90, 121.39, 118.83, 104.59, 94.91, -0.03. ESI-TOF ( $m/z$ ): Calcd.  $[\text{C}_{26}\text{H}_{23}\text{N}_3\text{Si} + \text{H}]^+$  for: 406.17, found: 406.14.

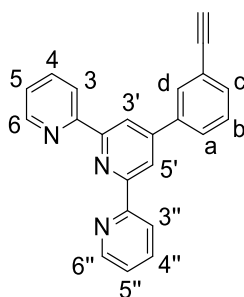

**Compound S-2.** Compound **S-2** was also synthesized according to a literature method.<sup>2</sup> To a flask containing solution of compound **S-1** (3.4 g, 8.4 mmol) in  $\text{CHCl}_3$  (30 mL) and MeOH (30 mL),  $\text{K}_2\text{CO}_3$  (4.6 g, 33.5 mmol) was added. The mixture was stirred at room temperature for 4 h and then extracted with  $\text{CHCl}_3$ . The combined organic phase was washed with brine and dried with anhydrous  $\text{Na}_2\text{SO}_4$ . After removal of solvent under vacuum, the crude was purified by column chromatography on silica gel with chloroform: ethanol (100:1) as eluent to afford the product as a light-yellow solid (2.6 g, 93 % yield).  $^1\text{H}$  NMR (500 MHz,  $\text{CDCl}_3$ , 300 K)  $\delta$  8.77 – 8.71 (m, 4H, tpy- $H^{6,6''}$ , tpy- $H^{3,5'}$ )  $\delta$  8.68 (dt,  $J = 7.9, 1.1$  Hz, 2H, tpy- $H^{3,3''}$ ), 8.05 (s, 1H, Ph- $H^d$ ), 7.96-7.83 (m, 3H, tpy- $H^{4,4''}$ , Ph- $H^a$ ), 7.58 (dt,  $J = 7.7, 1.4$  Hz, 1H, Ph- $H^c$ ), 7.47 (t, 1H, Ph- $H^b$ ), 7.39 – 7.33 (m, 2H, tpy- $H^{5,5''}$ ), 3.15 (s, 1H).  $^{13}\text{C}$  NMR (125 MHz,  $\text{CDCl}_3$ , 300 K)  $\delta$  156.06, 156.03, 149.31, 149.13, 138.78, 136.88, 132.50, 130.98, 128.96, 127.77, 123.91, 122.87, 121.35, 118.80, 83.25, 77.78. ESI-TOF ( $m/z$ ): Calcd.  $[\text{C}_{23}\text{H}_{15}\text{N}_3 + \text{H}]^+$  for: 334.13, found: 334.13.

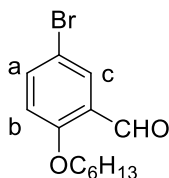

Compound **S-3**. Compound **S-3** was synthesized according to a literature method.<sup>3</sup> 2-hydroxyl-5-bromo benzaldehyde (5.0 g, 25.0 mmol) was dissolved in DMF (25 mL). 1-bromohexane (4.5 g, 27.5 mmol), K<sub>2</sub>CO<sub>3</sub> (6.9 g, 50.0 mmol) were added and the mixture was heated at 110 °C overnight. The reaction mixture was cooled to room temperature and extracted with ethyl acetate. The crude product was purified by a silica gel column chromatography with ethyl acetate: hexane (1:3) to afford the product as light yellow oil (4.5g, 92 % yield). <sup>1</sup>H NMR (400 MHz, CDCl<sub>3</sub>, 300 K) δ 10.42 (s, 1H, CHO-*H*), 7.92 (d, *J* = 2.8 Hz, 1H, Ph-*H*<sup>c</sup>), 7.59 (ddd, *J* = 8.9, 2.6, 0.4 Hz, 1H, Ph-*H*<sup>a</sup>), 6.87 (d, *J* = 8.9 Hz, 1H, Ph-*H*<sup>b</sup>), 4.07 (t, *J* = 6.4 Hz, 2H), 1.85 – 1.76 (m, 2H), 1.55 – 1.43 (m, 2H), 1.38 – 1.32 (m, 4H), 0.90 (t, *J* = 6.3 Hz, 3H). <sup>13</sup>C NMR (100 MHz, CDCl<sub>3</sub>) δ 188.36, 160.42, 138.21, 130.77, 126.16, 114.58, 113.18, 69.00, 31.45, 28.93, 25.65, 22.53, 13.86.

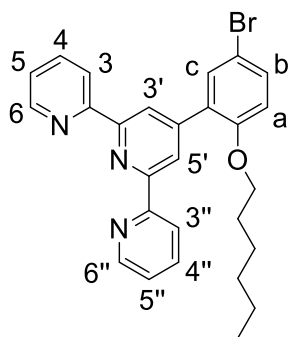

Compound **S-4**. Compound **S-4** was synthesized using the same method as compound **1**. To a flask containing NaOH (3.2 g, 80 mmol) in EtOH (100 mL), compound **S-3** (4.3 g, 15 mmol) and 2-acetylpyridine (5.3 g, 44 mmol) were subsequently added. After stirring at room temperature overnight, aqueous NH<sub>3</sub>•H<sub>2</sub>O (37 %, 60 mL) was added and the mixture was heated at 60 °C overnight. After cooling down to room temperature, the precipitate was filtered under vacuum and washed with ethanol and ethyl ether to give **S-4** as a yellow power (4.2 g, 68 % yield). <sup>1</sup>H NMR (400 MHz, CDCl<sub>3</sub>, 300K) δ 8.87 – 8.50 (m, 6H, tpy-*H*<sup>6,6''</sup>, tpy-*H*<sup>3,3''</sup>, tpy-*H*<sup>3',5'</sup>), 7.85 (td, *J* = 7.7, 1.8 Hz, 2H, tpy-*H*<sup>4,4''</sup>), 7.68 (d, *J* = 2.5 Hz, 1H, *H*<sup>c</sup>), 7.44 (dd, *J* = 8.7, 2.5 Hz, 1H, *H*<sup>b</sup>), 7.32 (ddd, *J* = 7.5, 4.8, 1.2 Hz, 0H), 6.86 (d, *J* = 8.7 Hz, 2H, tpy-*H*<sup>5,5''</sup>), 3.97 (t, *J* = 6.2 Hz, 2H), 1.69 (dt, *J* = 14.4, 6.3 Hz, 2H), 1.37 (m, 2H), 1.13 (m, 4H), 0.72 (t, *J* = 6.9 Hz, 3H). <sup>13</sup>C NMR (100 MHz, CDCl<sub>3</sub>, 300K) δ 156.28, 155.46, 155.20, 149.06, 146.98, 136.70, 132.91, 132.37, 130.29, 123.61, 121.59, 121.15, 113.93, 112.81, 68.81, 31.46, 29.02, 25.71, 22.31, 13.88. ESI-TOF (*m/z*): Calcd. [C<sub>27</sub>H<sub>26</sub>BrN<sub>3</sub>O +H]<sup>+</sup> for 488.13, found: 488.12.

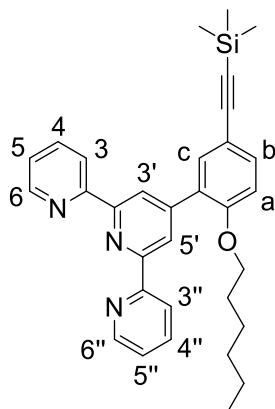

Compound **S-5**. Compound **S-5** was synthesized using the same method as compound **S-1**. A mixture of compound **S-4** (4.0 g, 8 mmol), Pd(PPh<sub>3</sub>)<sub>2</sub>Cl<sub>2</sub> (245 mg, 0.34 mmol) and copper(I) iodide (47 mg, 0.25 mmol) was degassed under nitrogen for three times. After that, 40 mL anhydrous THF, 20 mL anhydrous Et<sub>3</sub>N and ethynyltrimethylsilane (2.5 mL, 18 mmol) was added and then the mixture was stirred at 60 °C overnight. After cooling down to room temperature, solvent was removed under vacuum, and the residue was extracted with CH<sub>2</sub>Cl<sub>2</sub>. The combined organic phase was washed with brine and dried over Na<sub>2</sub>SO<sub>4</sub>. After removal of solvent under vacuum, the residue was purified by column chromatography on silica gel with DCM: methanol (100:1) as eluent to afford a yellow solid (3.2 g, 83 % yield). <sup>1</sup>H NMR (400 MHz, CDCl<sub>3</sub>, 300 K) δ 8.72 – 8.64 (m, 6H, tpy-*H*<sup>6,6''</sup>, tpy-*H*<sup>3',5'</sup>, tpy-*H*<sup>3,3''</sup>), 7.86 (td, *J* = 7.7, 1.8 Hz, 2H, tpy-*H*<sup>4,4''</sup>), 7.71 (d, *J* = 2.1 Hz, 1H, *H*<sup>c</sup>), 7.48 (dd, *J* = 8.8, 2.1 Hz, 1H, *H*<sup>b</sup>), 7.37 – 7.28 (m, 2H, tpy-*H*<sup>5,5''</sup>), 6.91 (d, *J* = 8.5 Hz, 1H, *H*<sup>a</sup>), 4.02 (t, *J* = 6.2 Hz, 2H), 1.70 (dt, *J* = 12.0, 6.3 Hz, 2H), 1.44 – 1.29 (m, 2H), 1.21 – 1.03 (m, 4H), 0.72 (t, *J* = 7.0 Hz, 3H). <sup>13</sup>C NMR (100 MHz, CDCl<sub>3</sub>, 300 K) δ 156.49, 156.35, 155.08, 149.01, 147.47, 136.65, 134.21, 133.67, 128.29, 123.53, 121.68, 121.13, 115.34, 111.87, 104.83, 92.90, 68.54, 31.45, 28.99, 25.70, 22.28, 13.86, 0.03. ESI-TOF (*m/z*): Calcd. [C<sub>32</sub>H<sub>35</sub>N<sub>3</sub>OSi + H]<sup>+</sup> for: 506.26, found: 506.26.

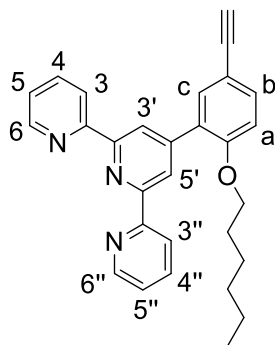

Compound **S-6**. To a flask containing solution of compound **S-5** (2.4 g, 4.8 mmol) in  $\text{CHCl}_3$  (40 mL) and MeOH (40 mL),  $\text{K}_2\text{CO}_3$  (2.1 g, 15 mmol) was added. The mixture was stirred at room temperature for 4 h and extracted with  $\text{CHCl}_3$ . The combined organic phase was washed with brine and dried with anhydrous  $\text{Na}_2\text{SO}_4$ . After removal of solvent under vacuum, the crude was purified by column chromatography on silica gel with chloroform: methanol (100:1) as eluent to afford the product as reported<sup>5</sup> as a light-yellow solid (1.6 g, 89 % yield).  $^1\text{H}$  NMR (400 MHz,  $\text{CDCl}_3$ , 300K)  $\delta$  8.72 – 8.68 (m, 2H, , tpy- $H^{6,6''}$ ), 8.67 (s, 2H, tpy- $H^{3',5'}$ ), 8.66 (dt,  $J = 8.0, 1.1$  Hz, 2H, tpy- $H^{3,3''}$ ), 7.85 (ddd,  $J = 8.0, 7.5, 1.8$  Hz, 2H, tpy- $H^{4,4''}$ ), 7.73 (d,  $J = 2.1$  Hz, 1H,  $H^c$ ), 7.50 (dd,  $J = 8.5, 2.1$  Hz, 1H,  $H^b$ ), 7.31 (ddd,  $J = 7.5, 4.8, 1.2$  Hz, 2H, tpy- $H^{5,5''}$ ), 6.93 (d,  $J = 8.6$  Hz, 1H,  $H^a$ ), 4.01 (t,  $J = 6.2$  Hz, 2H), 3.04 (s, 1H), 1.71 (ddt,  $J = 9.3, 7.9, 6.2$  Hz, 2H), 1.48 – 1.32 (m, 2H), 1.25 – 1.00 (m, 4H), 0.72 (t,  $J = 7.2$  Hz, 3H).  $^{13}\text{C}$  NMR (100 MHz,  $\text{CDCl}_3$ , 300K)  $\delta$  156.89, 156.53, 155.31, 149.20, 147.53, 136.80, 134.46, 133.97, 128.53, 123.71, 121.84, 121.29, 114.39, 112.18, 83.50, 76.34, 68.76, 31.62, 29.16, 25.86, 22.44, 14.01. ESI-TOF ( $m/z$ ): Calcd.  $[\text{C}_{29}\text{H}_{27}\text{N}_3\text{O} + \text{H}]^+$  for 434.22, found 434.22.

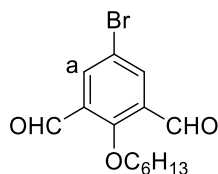

Compound **S-7**. Compound **S-7** was synthesized according to a literature method.<sup>4-5</sup> *p*-bromophenol (34.6 g, 0.2 mol) was dissolved in an aqueous solution of NaOH (25%, 50 mL) and methanol (50 mL) with formaldehyde (38%, 180 mL) was added subsequently. The mixture was stirred for 12 days at room temperature. Then, a mixture of water (100 mL) and acetic acid (30 mL) was added. The reaction mixture was stirred for 8 h at room temperature to give a white precipitate. The precipitate was filtrated and dissolved in 10% aqueous NaOH. After that, the solution was acidified with 2 M HCl to give 4-bromo-2,6-bis(hydroxymethyl)phenol as a white powder. A mixture of the white powder (6.0 g, 26 mmol), 1-bromohexane (5.1 g, 31mmol),  $\text{K}_2\text{CO}_3$  (7.2 g, 52 mmol) in 200 mL methyl ethyl ketone was refluxed under  $\text{N}_2$  overnight. The mixture was then cooled to room temperature and extracted with DCM. After removal of solvent under vacuum, a white residue was obtained. The white residue, PCC (11.8 g, 75 mmol) and celite (10 g) were dissolved in DCM (200 mL), and the mixture was stirred for 4 h at room temperature. The solution was filtered and poured onto silica gel column with DCM as eluent to afford 5-bromo-2-



Compound **S-8**. A mixture of compound **2** (2.51 g, 3.5 mmol), Pd(PPh<sub>3</sub>)<sub>2</sub>Cl<sub>2</sub> (125 mg, 0.17 mmol) and copper(I) iodide (26 mg, 0.14 mmol) was degassed under nitrogen for three times. After that, 30 mL anhydrous THF, 15 mL anhydrous Et<sub>3</sub>N and ethynyltrimethylsilane (2 mL, 14 mmol) was added and then the mixture was stirred at 60 °C overnight and then cooled to room temperature. The solvent was removed, and the residue was extracted with CHCl<sub>3</sub>. The combined organic phase was washed with brine and dried over Na<sub>2</sub>SO<sub>4</sub>. After removal of solvent under vacuum, the residue was purified by column chromatography on silica gel with chloroform: ethanol (100:1) as eluent to afford a yellow solid (2.4 g, 93 % yield). <sup>1</sup>H NMR (400 MHz, CDCl<sub>3</sub>, 300 K) δ 8.79 (s, 4H, tpy-*H*<sup>3',5'</sup>), 8.75 (ddd, *J* = 4.8, 1.8, 0.9 Hz, 4H, tpy-*H*<sup>6,6''</sup>), 8.69 (dt, *J* = 7.9, 1.1 Hz, 4H, tpy-*H*<sup>3,3''</sup>), 7.88 (ddd, *J* = 8.0, 7.5, 1.8 Hz, 4H, tpy-*H*<sup>4,4''</sup>), 7.78 (s, 2H, Ph-*H*<sup>a</sup>), 7.35 (ddd, *J* = 7.5, 4.8, 1.2 Hz, 4H, tpy-*H*<sup>5,5''</sup>), 3.36 (t, *J* = 6.1 Hz, 2H), 1.18 (dt, *J* = 14.5, 6.1 Hz, 2H), 0.91 (p, *J* = 7.9 Hz, 2H), 0.79 – 0.66 (m, 4H), 0.49 (t, 3H), 0.28 (s, 9H, TMS-*H*<sup>b</sup>). <sup>13</sup>C NMR (100 MHz, CDCl<sub>3</sub>, 300 K) δ 156.18, 155.45, 154.99, 149.16, 147.67, 136.81, 134.73, 134.07, 123.76, 121.58, 121.27, 119.50, 103.97, 94.73, 74.34, 31.29, 29.71, 25.39, 22.10, 13.75, 0.03. ESI-TOF (*m/z*): Calcd. [C<sub>47</sub>H<sub>44</sub>N<sub>6</sub>OSi + H]<sup>+</sup> for: 737.34, found: 737.30.

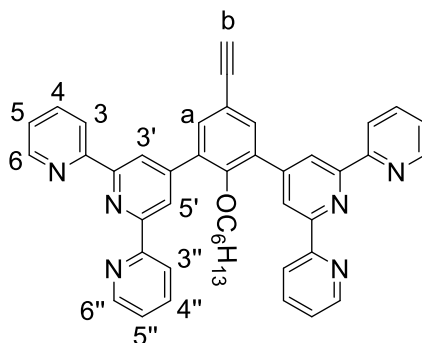

Compound **S-9**. To a flask containing solution of compound **S-8** (2.4 g, 3.4 mmol) in CHCl<sub>3</sub> (30 mL) and MeOH (30 mL), K<sub>2</sub>CO<sub>3</sub> (1.24 g, 13.6 mmol) was added. The mixture was stirred at room temperature for 4 h. The reaction mixture was extracted with CHCl<sub>3</sub>, and the combined organic phase was washed with brine and dried with anhydrous Na<sub>2</sub>SO<sub>4</sub>. After removal of solvent under vacuum, the crude was purified by column chromatography on silica gel with chloroform: ethanol (100:1) as eluent to afford the product as a light-yellow solid (1.9 g, 84% yield). <sup>1</sup>H NMR (400 MHz, CDCl<sub>3</sub>, 300 K) δ 8.79 (s, 4H, tpy-*H*<sup>3',5'</sup>), 8.74 (ddd, *J* = 4.8, 1.8, 0.9 Hz, 4H, tpy-*H*<sup>6,6''</sup>), 8.69 (dt, *J* = 7.9, 1.1 Hz, 4H, tpy-*H*<sup>3,3''</sup>), 7.88 (ddd, *J* = 8.0, 7.5, 1.8 Hz, 4H, tpy-*H*<sup>4,4''</sup>), 7.80 (s, 2H, Ph-*H*<sup>a</sup>), 7.35 (ddd, *J* = 7.5, 4.8, 1.2 Hz, 4H, tpy-*H*<sup>5,5''</sup>), 3.38 (t, *J* = 6.1 Hz, 2H), 3.12 (s, 1H, yne-*H*<sup>b</sup>),

1.28 – 1.09 (m, 2H), 0.91 (p,  $J = 7.4$  Hz, 2H), 0.73 (ddd,  $J = 6.5, 4.1, 1.7$  Hz, 4H), 0.49 (t, 3H).  $^{13}\text{C}$  NMR (100 MHz,  $\text{CDCl}_3$ , 300 K)  $\delta$  156.14, 155.50, 155.27, 149.16, 147.52, 136.78, 134.86, 131.87, 128.52, 123.76, 121.54, 121.23, 118.36, 77.61, 74.37, 31.28, 29.70, 25.37, 22.09, 13.74. ESI-TOF ( $m/z$ ): Calcd.  $[\text{C}_{44}\text{H}_{36}\text{N}_6\text{O} + \text{H}]^+$  for: 665.30, found: 665.27.

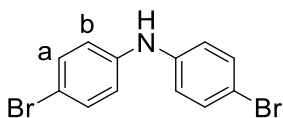

**Compound S-10.** Compound **S-10** was synthesized according to the literature report.<sup>6</sup> A solution of *N*-bromosuccinimide (NBS) (5.3 g, 28.6 mmol) in DMF (30 mL) was added dropwise to a stirred solution of diphenylamine (2.5 g, 14.8 mmol) in DMF (20 mL) at 0 °C. The resulting solution continued to be stirred at 0 °C for 6 h. Water then was added to bring the product out of solution. The precipitate was filtered and dried under vacuum to afford the product as a white powder (3.9 g, 81 % yield).  $^1\text{H}$  NMR (500 MHz,  $\text{CDCl}_3$ , 300 K)  $\delta$  7.36 (d,  $J = 8.8$  Hz, 4H, Ph- $H^a$ ), 6.92 (d,  $J = 8.8$  Hz, 4H, Ph- $H^b$ ).  $^{13}\text{C}$  NMR (125 MHz,  $\text{CDCl}_3$ , 300 K)  $\delta$  141.67, 132.28, 119.47, 113.36. ESI-TOF ( $m/z$ ): Calcd.  $[\text{C}_{12}\text{H}_9\text{Br}_2\text{N} + \text{H}]^+$  for: 325.92, found: 325.91.

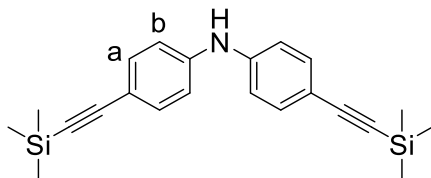

**Compound S-11.** Compound **S-11** was synthesized using the similar method of the reported literature.<sup>7</sup> Compound **S-10** (1.95 g, 6.0 mmol),  $\text{Pd}(\text{PPh}_3)_2\text{Cl}_2$  (62 mg, 0.08 mmol) and copper(I) iodide (9.5 mg, 0.05 mmol) was degassed under nitrogen for three times. After that, anhydrous THF (30 mL), anhydrous  $\text{Et}_3\text{N}$  (30 mL) and ethynyltrimethylsilane (3.2 mL, 20 mmol) was added and then the mixture was stirred at 60 °C for 2 days. The solvent was removed, and the residue was extracted with  $\text{CH}_2\text{Cl}_2$ . The combined organic phase was washed with brine and dried over  $\text{Na}_2\text{SO}_4$ . After removal of solvent under vacuum, the residue was purified by column chromatography on silica gel with  $\text{CH}_2\text{Cl}_2$ : hexane (1:1) as eluent to afford the product as a brown solid (1.25 g, 58 % yield).  $^1\text{H}$  NMR (500 MHz,  $\text{CDCl}_3$ , 300 K)  $\delta$  7.37 (d,  $J = 8.6$  Hz, 4H, Ph- $H^a$ ), 6.97 (d,  $J = 8.6$  Hz, 4H, Ph- $H^b$ ), 0.24 (s, 18H).  $^{13}\text{C}$  NMR (125 MHz,  $\text{CDCl}_3$ , 300 K)  $\delta$  142.32,

133.30, 117.24, 115.53, 105.31, 92.80, 0.07. ESI-TOF ( $m/z$ ): Calcd.  $[\text{C}_{22}\text{H}_{27}\text{NSi}_2 + \text{H}]^+$  for: 362.18, found: 362.14.

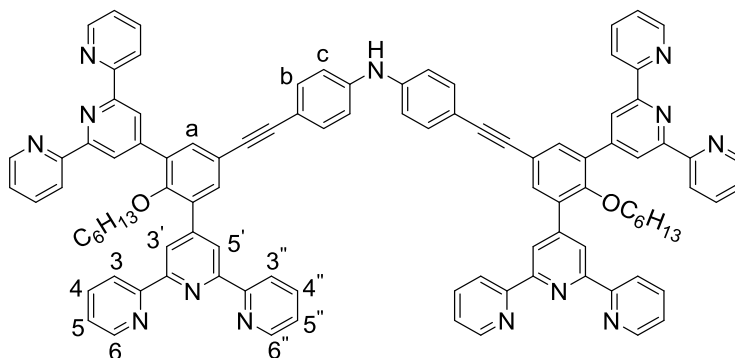

Compound **S-12**. Compound **S-11** (288 mg, 0.8 mmol), Compound **2** (1.44 g, 2.0 mmol),  $\text{Pd}(\text{PPh}_3)_4$  (74.2 mg, 0.06 mmol) and copper(I) iodide (9.5 mg, 0.05 mmol) was degassed under nitrogen for three times. After that, 30 mL anhydrous THF, 30 mL anhydrous  $\text{Et}_3\text{N}$  was added and then the mixture was stirred at 70 °C for a while. TBAF (2 mmol, 1M in THF, 2 mL) was added and the reaction mixture was stirred at 70 °C for 2 days. The solvent was removed, and the residue was extracted with  $\text{CHCl}_3$ . The combined organic phase was washed with brine and dried with anhydrous  $\text{Na}_2\text{SO}_4$ . After removal of solvent under vacuum, the crude was purified by column chromatography on silica gel with chloroform: methanol (100:1) as eluent to afford the product as a yellow solid (500 mg, 42 % yield).  $^1\text{H}$  NMR (500 MHz,  $\text{CDCl}_3$ , 300 K)  $\delta$  8.82 (s, 8H, tpy- $H^{3',5'}$ ), 8.78 – 8.74 (m, 8H, tpy- $H^{6,6''}$ ), 8.70 (d,  $J = 7.9$  Hz, 8H, tpy- $H^{3,3''}$ ), 7.89 (td,  $J = 7.7, 1.8$  Hz, 8H, tpy- $H^{4,4''}$ ), 7.82 (s, 4H, Ph- $H^a$ ), 7.47 (d,  $J = 8.3$  Hz, 4H, Ph- $H^b$ ), 7.36 (ddd,  $J = 7.5, 4.8, 1.2$  Hz, 8H, tpy- $H^{5,5''}$ ), 7.08 (d,  $J = 8.3$  Hz, 4H, Ph- $H^c$ ), 3.38 (t,  $J = 6.2$  Hz, 4H), 1.19 (dq,  $J = 11.5, 6.2$  Hz, 4H), 0.92 (m, 4H), 0.74 (m, 8H), 0.49 (t,  $J = 6.6$  Hz, 6H).  $^{13}\text{C}$  NMR (125 MHz,  $\text{CDCl}_3$ , 300 K)  $\delta$  156.16, 155.41, 155.29, 154.49, 149.15, 147.80, 142.29, 136.84, 134.10, 132.93, 123.76, 121.64, 121.28, 120.03, 117.45, 115.44, 90.18, 87.43, 74.33, 31.32, 29.74, 25.43, 22.12, 13.79. ESI-TOF ( $m/z$ ): Calcd.  $[\text{C}_{100}\text{H}_{79}\text{N}_{13}\text{O}_2 + 2\text{H}]^{2+}$  for: 747.83, found: 747.79.



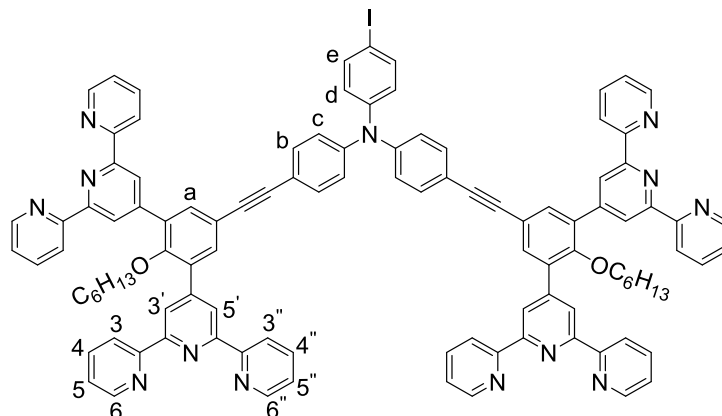

Compound **S-13**. Compound **S-13** was synthesized according to a literature method.<sup>8</sup> To a flask containing solution of compound **S-12** (448 mg, 0.3 mmol) in toluene (25 mL), 1,4-diodobenzene (3.29 mg, 1.0 mmol), 1,10-phenanthroline (5.4 mg, 0.03 mmol), copper(I) iodide (5.7 mg, 0.03 mmol), potassium hydroxide (170 mg, 3.2 mmol) were added. The mixture was refluxed for 2 days. Then the reaction mixture was extracted with CH<sub>2</sub>Cl<sub>2</sub>, and the combined organic phase was washed with brine and dried with anhydrous Na<sub>2</sub>SO<sub>4</sub>. After removal of solvent under vacuum, the crude was purified by column chromatography on silica gel with with chloroform: methanol (100:1) as eluent to afford the product as a yellow solid (120 mg, 24 % yield). <sup>1</sup>H NMR (500 MHz, CDCl<sub>3</sub>, 300 K) δ 8.81 (s, 8H, tpy-*H*<sup>3',5'</sup>), 8.77 – 8.74 (m, 8H, tpy-*H*<sup>6,6''</sup>), 8.70 (d, *J* = 8.0 Hz, 8H, tpy-*H*<sup>3,3''</sup>), 7.89 (td, *J* = 7.7, 1.8 Hz, 8H, tpy-*H*<sup>4,4''</sup>), 7.83 (s, 4H, Ph-*H*<sup>a</sup>), 7.58 (d, *J* = 8.7 Hz, 2H, Ph-*H*<sup>d</sup>), 7.45 (d, *J* = 8.7 Hz, 4H, Ph-*H*<sup>b</sup>), 7.36 (ddd, *J* = 7.5, 4.8, 1.2 Hz, 8H, tpy-*H*<sup>5,5''</sup>), 7.07 (d, *J* = 8.7 Hz, 4H, Ph-*H*<sup>c</sup>), 6.91 (d, *J* = 8.7 Hz, 2H, Ph-*H*<sup>e</sup>), 3.38 (t, *J* = 6.0 Hz, 4H), 1.19 (dd, *J* = 9.1, 5.9 Hz, 4H), 0.92 (t, *J* = 7.7 Hz, 4H), 0.73 (dt, *J* = 6.5, 2.8 Hz, 8H), 0.49 (t, *J* = 6.7 Hz, 6H). <sup>13</sup>C NMR (125 MHz, CDCl<sub>3</sub>, 300 K) δ 156.18, 155.45, 154.67, 149.17, 147.72, 146.66, 146.59, 138.44, 136.78, 134.21, 134.15, 132.79, 126.78, 123.75, 123.69, 121.58, 121.23, 119.73, 117.65, 89.75, 88.29, 86.88, 74.34, 31.30, 29.72, 25.41, 22.11, 13.78. ESI-TOF (*m/z*): Calcd. [C<sub>106</sub>H<sub>82</sub>IN<sub>13</sub>O<sub>2</sub> + 2H]<sup>2+</sup> for: 848.80, found: 848.76.

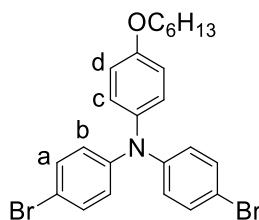

Compound **3**. Compound **3** was synthesized according to a literature method.<sup>8-9</sup> To a flask containing solution of compound **S-10** (3.25 g, 10.0 mmol), 1-(hexyloxy)-4-iodobenzene (3.95 g, 13 mmol), 1,10-phenanthroline (142 mg, 0.8 mmol), copper(I) chloride (80 mg, 0.8 mmol) in toluene (25 mL), potassium hydroxide (4.82 g, 86 mmol) was added. The mixture was refluxed for 2 days. Then the reaction mixture was extracted with CH<sub>2</sub>Cl<sub>2</sub>, and the combined organic phase was washed with brine and dried with anhydrous Na<sub>2</sub>SO<sub>4</sub>. After removal of solvent under vacuum, the crude was purified by column chromatography on silica gel with CH<sub>2</sub>Cl<sub>2</sub>: hexane (1:3) as eluent to afford the product as a light yellowish oil (2.4 g, 48% yield). <sup>1</sup>H NMR (400 MHz, CDCl<sub>3</sub>, 300 K) δ 7.35 – 7.27 (m, 4H, Ph-*H*<sup>a</sup>), 7.07 – 6.99 (m, 2H, Ph-*H*<sup>c</sup>), 6.95 – 6.87 (m, 4H, Ph-*H*<sup>b</sup>), 6.87 – 6.80 (m, 2H, Ph-*H*<sup>d</sup>), 3.94 (t, *J* = 6.5 Hz, 2H), 1.79 (dq, *J* = 7.9, 6.6 Hz, 2H), 1.53 – 1.42 (m, 2H), 1.40 – 1.31 (m, 4H), 0.93 (t, 3H). <sup>13</sup>C NMR (100 MHz, CDCl<sub>3</sub>, 300 K) δ 156.34, 146.81, 139.44, 132.11, 127.39, 124.20, 115.56, 114.45, 68.26, 31.57, 29.26, 25.73, 22.59, 14.02. ESI-TOF (*m/z*): Calcd. [C<sub>24</sub>H<sub>25</sub>Br<sub>2</sub>NO + H]<sup>+</sup> for: 502.04, found: 502.04.

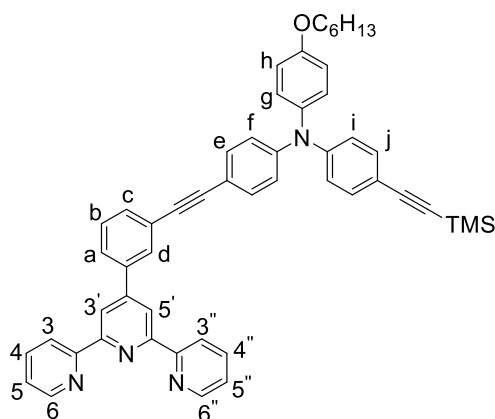

Compound **S-14**. Compound **S-14** (2.2 g, 4.4 mmol), Compound **S-2** (932 mg, 2.8 mmol), Pd(PPh<sub>3</sub>)<sub>4</sub> (254 mg, 0.22 mmol) and copper(I) iodide (33 mg, 0.18 mmol) was degassed under nitrogen for three times. After that, 50 mL anhydrous THF, 50 mL anhydrous Et<sub>3</sub>N was added and then the mixture was stirred at 70 °C overnight. Ethynyltrimethylsilane (1.8 mL, 12 mmol) was added and the reaction mixture continued to be stirred at 70 °C for another day. The solvent was removed, and the residue was extracted with CHCl<sub>3</sub>. The combined organic phase was washed with brine and dried with anhydrous Na<sub>2</sub>SO<sub>4</sub>. After removal of solvent under vacuum, the crude was purified by column chromatography on silica gel with chloroform: methanol (100:1) as eluent to afford the product as a yellow solid (900 mg, 42 % yield). <sup>1</sup>H NMR (500 MHz, CDCl<sub>3</sub>, 300 K)

$\delta$  8.78 – 8.72 (m, 4H, tpy- $H^{3',5'}$ , tpy- $H^{6,6''}$ ), 8.69 (dd,  $J = 8.0, 1.1$  Hz, 2H, tpy- $H^{3,3''}$ ), 8.07 (dt,  $J = 3.4, 1.7$  Hz, 1H, Ph- $H^d$ ), 7.89 (td,  $J = 7.7, 1.8$  Hz, 2H, tpy- $H^{4,4''}$ ), 7.85 (dt,  $J = 7.8, 1.5$  Hz, 1H, Ph- $H^a$ ), 7.59 (dt,  $J = 7.7, 1.3$  Hz, 1H, Ph- $H^c$ ), 7.51 – 7.45 (m, 1H, Ph- $H^b$ ), 7.41 (d,  $J = 8.6$  Hz, 2H, Ph- $H^f$ ), 7.37 (ddd,  $J = 7.5, 4.8, 1.2$  Hz, 2H, tpy- $H^{5,5''}$ ), 7.32 (d,  $J = 8.7$  Hz, 2H, Ph- $H^j$ ), 7.06 (d,  $J = 8.9$  Hz, 2H, Ph- $H^g$ ), 7.00 (d,  $J = 8.6$  Hz, 2H, Ph- $H^i$ ), 6.97 (d,  $J = 8.6$  Hz, 2H, Ph- $H^e$ ), 6.86 (d,  $J = 8.9$  Hz, 2H, Ph- $H^h$ ), 3.95 (t,  $J = 6.5$  Hz, 2H), 1.88 – 1.72 (m, 2H), 1.52 – 1.42 (m, 2H), 1.35 (dq,  $J = 7.6, 3.7$  Hz, 4H), 0.92 (t,  $J = 3.7$  Hz, 3H), 0.24 (s, 9H).  $^{13}\text{C}$  NMR (125 MHz,  $\text{CDCl}_3$ , 300 K)  $\delta$  156.56, 155.88, 155.78, 149.64, 148.93, 147.58, 147.52, 139.11, 138.56, 137.11, 132.94, 132.62, 131.88, 130.27, 128.96, 127.93, 126.90, 124.36, 123.95, 122.27, 122.19, 122.16, 121.50, 118.95, 116.20, 116.09, 115.51, 105.29, 93.20, 90.27, 88.39, 68.23, 31.58, 29.26, 25.73, 22.60, 14.03, 0.05. ESI-TOF ( $m/z$ ): Calcd.  $[\text{C}_{52}\text{H}_{48}\text{N}_4\text{OSi} + \text{H}]^+$  for: 773.37, found: 773.33.

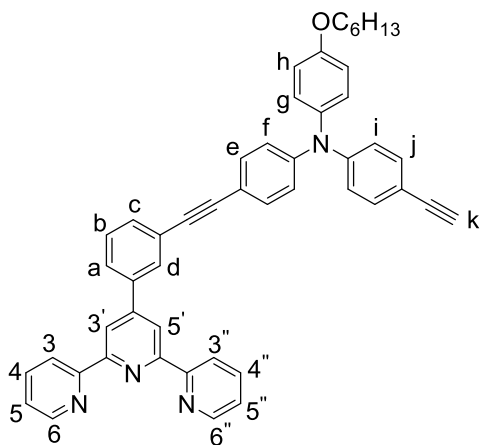

Compound **S-15**. To a flask containing solution of compound **S-14** (800 mg, 1.0 mmol) in  $\text{CHCl}_3$  (30 mL) and MeOH (30 mL),  $\text{K}_2\text{CO}_3$  (552 mg, 4 mmol) was added. The mixture was stirred at room temperature for 4 h and then extracted with  $\text{CHCl}_3$ . The combined organic phase was washed with brine and dried with anhydrous  $\text{Na}_2\text{SO}_4$ . After removal of solvent under vacuum, the crude was purified by column chromatography on silica gel with chloroform: ethanol (100:1) as eluent to afford the product as a yellow solid (620 mg, 89 % yield).  $^1\text{H}$  NMR (500 MHz,  $\text{CDCl}_3$ , 300 K)  $\delta$  8.78 – 8.72 (m, 1H, tpy- $H^{3',5'}$ , tpy- $H^{6,6''}$ ), 8.69 (dd,  $J = 8.0, 1.1$  Hz, 2H, tpy- $H^{3,3''}$ ), 8.07 (t,  $J = 1.7$  Hz, 1H, Ph- $H^d$ ), 7.89 (td,  $J = 7.7, 1.8$  Hz, 2H, tpy- $H^{4,4''}$ ), 7.86 – 7.82 (m, 1H, Ph- $H^a$ ), 7.59 (dt,  $J = 7.6, 1.3$  Hz, 1H, Ph- $H^c$ ), 7.49 (m, 1H, Ph- $H^b$ ), 7.44 (d,  $J = 8.7$  Hz, 2H, Ph- $H^f$ ), 7.37 (ddd,  $J = 7.5, 4.8, 1.2$  Hz, 2H, tpy- $H^{5,5''}$ ), 7.35 (d,  $J = 8.7$  Hz, 2H, Ph- $H^j$ ), 7.07 (d,  $J = 8.9$  Hz, 2H, Ph- $H^g$ ), 7.02 (d,  $J = 8.7$  Hz, 2H, Ph- $H^i$ ), 6.99 (d,  $J = 8.7$  Hz, 2H, Ph- $H^e$ ), 6.87 (d,  $J = 9.0$  Hz, 2H, Ph- $H^h$ ), 3.95

(t,  $J = 6.5$  Hz, 2H), 3.03 (s, 1H), 1.86 – 1.72 (m, 2H), 1.52 – 1.43 (m, 2H), 1.35 (m, 4H), 0.92 (t,  $J = 3.7$  Hz, 3H).  $^{13}\text{C}$  NMR (125 MHz,  $\text{CDCl}_3$ , 300 K)  $\delta$  156.65, 156.13, 156.00, 149.61, 149.14, 147.90, 147.47, 139.08, 138.72, 136.89, 133.08, 132.64, 131.85, 130.31, 128.95, 128.04, 126.91, 124.35, 123.89, 122.32, 122.08, 121.38, 118.84, 116.26, 115.56, 115.00, 90.20, 88.44, 83.84, 76.28, 68.26, 31.59, 29.28, 25.75, 22.61, 14.04. ESI-TOF ( $m/z$ ): Calcd.  $[\text{C}_{49}\text{H}_{40}\text{N}_4\text{O} + \text{H}]^+$  for: 701.33, found: 701.31.

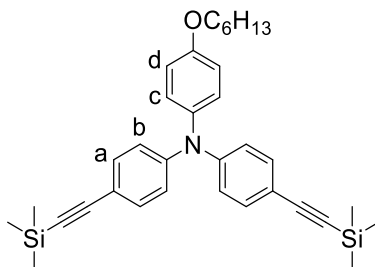

**Compound 4.** Compound **3** (2.51 g, 5.0 mmol),  $\text{Pd}(\text{PPh}_3)_2\text{Cl}_2$  (62 mg, 0.08 mmol) and copper(I) iodide (9.5 mg, 0.05 mmol) was degassed under nitrogen for three times. After that, 40 mL anhydrous THF, 30 mL anhydrous  $\text{Et}_3\text{N}$  and ethynyltrimethylsilane (3.6 mL, 24 mmol) was added and then the mixture was stirred at 70 °C for 2 days and then cooled to room temperature. The solvent was removed, and the residue was extracted with  $\text{CH}_2\text{Cl}_2$ . The combined organic phase was washed with brine and dried over  $\text{Na}_2\text{SO}_4$ . After removal of solvent under vacuum, the residue was purified by column chromatography on silica gel with  $\text{CH}_2\text{Cl}_2$ : hexane (1:3) as eluent to afford the product as a light yellowish oil (2.3 g, 86 % yield).  $^1\text{H}$  NMR (400 MHz,  $\text{CDCl}_3$ , 300 K)  $\delta$  7.33 – 7.27 (m, 4H, Ph- $H^a$ ), 7.05 – 6.98 (m, 2H, Ph- $H^c$ ), 6.95 – 6.89 (m, 4H, Ph- $H^b$ ), 6.88 – 6.81 (m, 2H, Ph- $H^d$ ), 3.94 (t,  $J = 6.5$  Hz, 2H), 1.78 (dq,  $J = 7.9, 6.5$  Hz, 2H), 1.47 (p,  $J = 7.0$  Hz, 2H), 1.41 – 1.30 (m, 4H), 1.00 – 0.83 (t, 3H), 0.24 (s, 18H).  $^{13}\text{C}$  NMR (100 MHz,  $\text{CDCl}_3$ , 300 K)  $\delta$  156.55, 147.60, 139.14, 132.93, 127.83, 122.12, 116.22, 115.51, 105.28, 93.22, 68.26, 31.59, 29.28, 25.74, 22.60, 14.02, 0.05. ESI-TOF ( $m/z$ ): Calcd.  $[\text{C}_{34}\text{H}_{43}\text{NOSi}_2 + \text{H}]^+$  for: 538.30, found: 538.27.

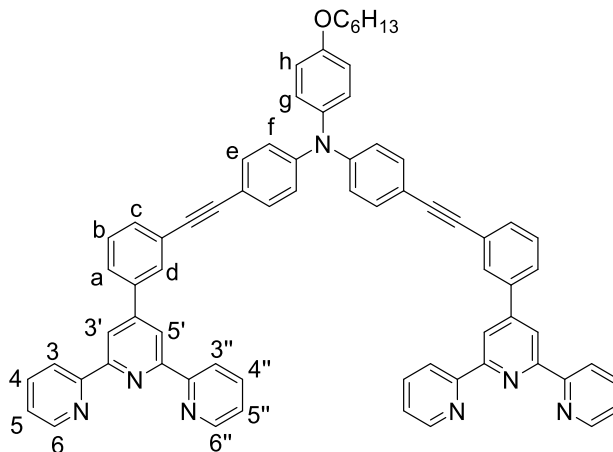

Compound **LA**. Compound **4** (1.07 g, 2.0 mmol), compound **1** (1.94 g, 5.0 mmol), Pd(PPh<sub>3</sub>)<sub>4</sub> (254 mg, 0.22 mmol) and copper(I) iodide (28 mg, 0.15 mmol) was degassed under nitrogen for three times. After that, 40 mL anhydrous THF, 30 mL anhydrous Et<sub>3</sub>N was added and then the mixture was stirred at 70 °C for a while. TBAF (4 mmol, 1M in THF, 4 mL) was added and the reaction mixture was stirred at 70 °C for another 2 days. The solvent was removed, and the residue was extracted with CHCl<sub>3</sub>. The combined organic phase was washed with brine and dried with anhydrous Na<sub>2</sub>SO<sub>4</sub>. After removal of solvent under vacuum, the crude was purified by column chromatography on silica gel with chloroform: ethanol (100:2) as eluent to afford the product as a yellow solid (1.7 g, 84% yield). <sup>1</sup>H NMR (400 MHz, CDCl<sub>3</sub>, 300 K) δ 8.74 (d, 8H, tpy-*H*<sup>3',5'</sup>, tpy-*H*<sup>6,6''</sup>), 8.67 (dt, *J* = 8.0, 1.1 Hz, 4H, tpy-*H*<sup>3,3''</sup>), 8.07 (t, *J* = 1.7 Hz, 2H, Ph-*H*<sup>d</sup>), 7.95 – 7.77 (m, 6H, tpy-*H*<sup>4,4''</sup>, Ph-*H*<sup>a</sup>), 7.59 (dt, *J* = 7.7, 1.3 Hz, 2H, Ph-*H*<sup>c</sup>), 7.49 (d, *J* = 7.8 Hz, 2H, Ph-*H*<sup>b</sup>), 7.45 (d, *J* = 8.7 Hz, 4H, Ph-*H*<sup>e</sup>), 7.34 (ddd, *J* = 7.5, 4.8, 1.2 Hz, 4H, tpy-*H*<sup>5,5''</sup>), 7.10 (d, *J* = 8.9 Hz, 2H, Ph-*H*<sup>g</sup>), 7.06 (d, *J* = 8.7 Hz, 4H, Ph-*H*<sup>f</sup>), 6.89 (d, *J* = 8.9 Hz, 2H, Ph-*H*<sup>h</sup>), 3.96 (t, *J* = 6.5 Hz, 2H), 1.89 – 1.71 (m, 2H), 1.59 – 1.44 (m, 2H), 1.40 – 1.26 (m, 4H), 0.93 (t, 3H). <sup>13</sup>C NMR (100 MHz, CDCl<sub>3</sub>, 300 K) δ 156.67, 156.15, 156.01, 149.58, 149.15, 147.60, 139.20, 138.73, 136.88, 132.70, 131.89, 130.32, 128.98, 128.08, 126.90, 124.44, 123.88, 122.33, 121.39, 118.86, 116.22, 115.62, 90.34, 88.49, 68.30, 31.62, 29.32, 25.78, 22.63, 14.07. ESI-TOF (*m/z*): Calcd. for [C<sub>70</sub>H<sub>53</sub>N<sub>7</sub>O + H]<sup>+</sup>: 1008.44, found: 1008.44. Calcd. for [C<sub>70</sub>H<sub>53</sub>N<sub>7</sub>O + 2H]<sup>2+</sup>: 504.72, found: 504.69.

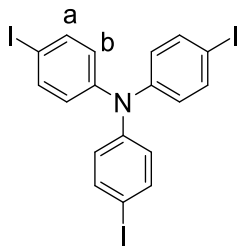

Compound **5**. Compound **5** was synthesized according to a literature method.<sup>10</sup> To a stirred solution of triphenylamine (10.0 g, 40 mmol) and KI (13.5 g, 80 mmol) in 340 mL acetic acid and 30 mL water at 80 °C, KIO<sub>3</sub> (12.0 g, 56 mmol) was added slowly. After stirring at 50 °C overnight, 200 mL water was added to induce precipitation of crude product. The precipitate was filtered under vacuum and washed with ethanol to give the product as a white powder (18 g, 83 % yield). <sup>1</sup>H NMR (500 MHz, CDCl<sub>3</sub>, 300 K) δ 7.54 (d, *J* = 8.7 Hz, 6H), 6.81 (d, *J* = 8.7 Hz, 6H). <sup>13</sup>C NMR (125 MHz, CDCl<sub>3</sub>, 300 K) δ 146.51, 138.41, 126.00, 86.56. ESI-TOF (*m/z*): Calcd. [C<sub>18</sub>H<sub>12</sub>I<sub>3</sub>N + H]<sup>+</sup> for: 623.82, found: 623.82.

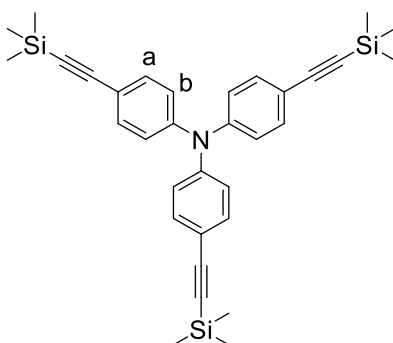

Compound **6**. Compound **6** was synthesized according to a literature method.<sup>11</sup> A mixture of compound **5** (1.245 g, 2 mmol), Pd(PPh<sub>3</sub>)<sub>2</sub>Cl<sub>2</sub> (92 mg, 0.12 mmol) and copper(I) iodide (15 mg, 0.08 mmol) was degassed under nitrogen for three times. After that, 30 mL anhydrous THF, 15 mL anhydrous Et<sub>3</sub>N and ethynyltrimethylsilane (1.8 mL, 12 mmol) was added and then the mixture was stirred at 60 °C overnight and then cooled to room temperature. The solvent was removed, and the residue was extracted with CH<sub>2</sub>Cl<sub>2</sub>. The combined organic phase was washed with brine and dried over Na<sub>2</sub>SO<sub>4</sub>. After removal of solvent under vacuum, the residue was purified by column chromatography on silica gel with CH<sub>2</sub>Cl<sub>2</sub>: hexane (4:1) as eluent to afford a yellow solid (960 mg, 90 % yield). <sup>1</sup>H NMR (400 MHz, CDCl<sub>3</sub>, 300 K) δ 7.39 – 7.30 (m, 6H, Ph-*H*<sup>a</sup>), 7.02 – 6.92 (m, 6H,

Ph- $H^b$ ), 0.24 (s, 27H).  $^{13}\text{C}$  NMR (100 MHz,  $\text{CDCl}_3$ , 300 K)  $\delta$  146.78, 133.15, 123.80, 117.82, 104.85, 93.95, 0.01. ESI-TOF ( $m/z$ ): Calcd.  $[\text{C}_{33}\text{H}_{39}\text{NSi}_3 + \text{H}]^+$  for: 534.25, found: 534.25.

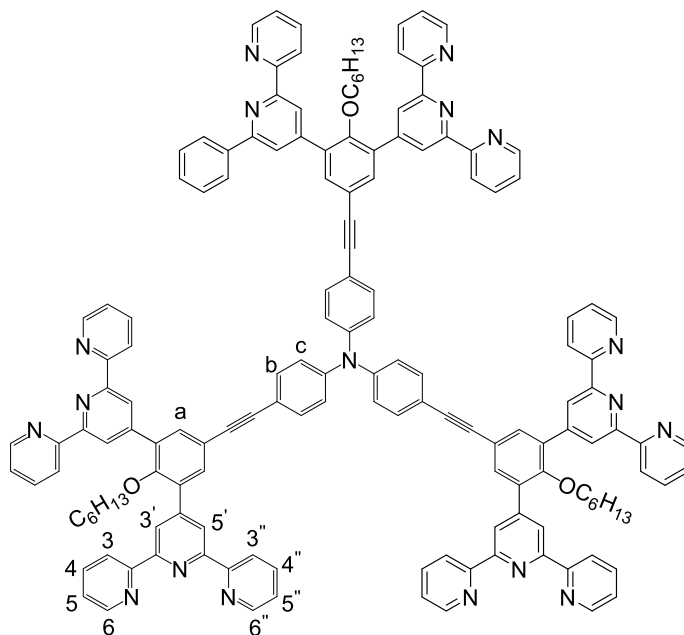

Compound **L**. Compound **6** (320 mg, 0.6 mmol), compound **2** (2.16 g, 3 mmol),  $\text{Pd}(\text{PPh}_3)_4$  (152 mg, 0.11 mmol) and copper(I) iodide (14 mg, 0.08 mmol) was degassed under nitrogen for three times. After that, anhydrous THF (40 mL) and anhydrous  $\text{Et}_3\text{N}$  (40 mL) was added and the mixture was stirred at 80 °C for a while. TBAF (3.6 mmol, 1M in THF, 3.6 mL) was added and the reaction mixture was stirred at 70 °C for 2 days. The solvent was removed, and the residue was extracted with  $\text{CHCl}_3$ . The combined organic phase was washed with brine and dried with anhydrous  $\text{Na}_2\text{SO}_4$ . After removal of solvent under vacuum, the crude was purified by column chromatography on silica gel with chloroform: methanol (100:2) as eluent to afford the product as a yellow solid (1.1 g, 82% yield).  $^1\text{H}$  NMR (400 MHz,  $\text{CDCl}_3$ , 300 K)  $\delta$  8.83 (s, 12H, tpy- $H^{3',5'}$ ), 8.78 – 8.73 (m, 12H, tpy- $H^{6,6''}$ ), 8.69 (d,  $J = 7.9$  Hz, 12H, tpy- $H^{3,3''}$ ), 7.93 – 7.76 (m, 18H, tpy- $H^{4,4''}$ , Ph- $H^a$ ), 7.49 (d,  $J = 8.3$  Hz, 6H, Ph- $H^b$ ), 7.34 (dd,  $J = 7.4, 4.8$  Hz, 12H, tpy- $H^{5,5''}$ ), 7.13 (d,  $J = 8.3$  Hz, 6H, Ph- $H^c$ ), 3.40 (t,  $J = 6.0$  Hz, 6H), 1.20 (dd,  $J = 9.0, 5.8$  Hz, 6H), 0.93 (t,  $J = 7.6$  Hz, 6H), 0.75 (dt,  $J = 7.9, 4.3$  Hz, 12H), 0.49 (t,  $J = 6.5$  Hz, 9H).  $^{13}\text{C}$  NMR (100 MHz,  $\text{CDCl}_3$ , 300 K)  $\delta$  156.24, 155.51, 154.72, 149.21, 147.78, 146.78, 136.79, 134.27, 134.22, 132.86, 124.13, 123.76, 121.64, 121.26, 119.85, 117.84, 89.91, 88.37, 74.40, 31.34, 29.76, 25.44, 22.14, 13.80. ESI-TOF ( $m/z$ ): Calcd.  $[\text{C}_{151}\text{H}_{118}\text{N}_{18}\text{O}_3 + 2\text{H}]^{2+}$  for: 1116.49, found: 1116.49.

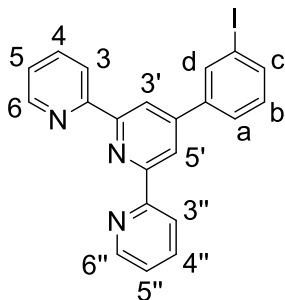

Compound **S-16**. Compound **S-16** was synthesized using the same method as compound **1**.<sup>2</sup> To a flask containing NaOH (4.8 g, 120 mmol) in EtOH (150 mL), 3-iodobenzaldehyde (4.2 g, 20 mmol) and 2-acetylpyridine (5.3 g, 44 mmol) were subsequently added. After stirring at room temperature overnight, aqueous  $\text{NH}_3 \cdot \text{H}_2\text{O}$  (37 %, 150 mL) was added and the mixture was heated at 60 °C overnight. After cooling down to room temperature, the precipitate was filtered under vacuum and washed with ethanol to give **S-16** as a white powder (5.4 g, 62 % yield). <sup>1</sup>H NMR (400 MHz,  $\text{CDCl}_3$ , 300 K)  $\delta$  8.78 – 8.71 (m, 2H, tpy- $H^{6,6''}$ ), 8.69-8.62 (m, 4H, tpy-  $H^{3',5'}$ , tpy- $H^{3,3''}$ ), 8.23 (s, 1H, Ph- $H^d$ ), 7.92-7.85 (m, 3H, tpy- $H^{4,4''}$ , Ph- $H^a$ ), 7.78 (dt,  $J = 7.9, 1.3$  Hz, 1H, Ph- $H^c$ ), 7.36 (m, 2H, tpy- $H^{5,5''}$ ), 7.23 (m, 1H, Ph- $H^b$ ). <sup>13</sup>C NMR (100 MHz,  $\text{CDCl}_3$ , 300 K)  $\delta$  156.03, 155.97, 155.52, 149.11, 148.77, 140.72, 137.89, 136.88, 136.05, 130.53, 126.65, 123.93, 121.36, 118.75. ESI-TOF ( $m/z$ ): Calcd.  $[\text{C}_{21}\text{H}_{14}\text{IN}_3 + \text{H}]^+$  for: 436.03. Found: 436.03.

Compound **S-17**. Compound **S-17** was synthesized according to a literature method.<sup>12</sup> Compound **S-16** (218 mg, 0.5 mmol) was dissolved in 30 mL  $\text{CHCl}_3$  and 30 mL MeOH.  $\text{RuCl}_3 \cdot x\text{H}_2\text{O}$  (315 mg, 1 mmol) was added and the suspension was refluxed for 48h. After cooling down, the resultant dark brown solid was filtered, washed with MeOH by centrifugation, and dried in vacuum to afford the product as a dark brown solid (250 mg, 78 % yield). This material was used without characterization.



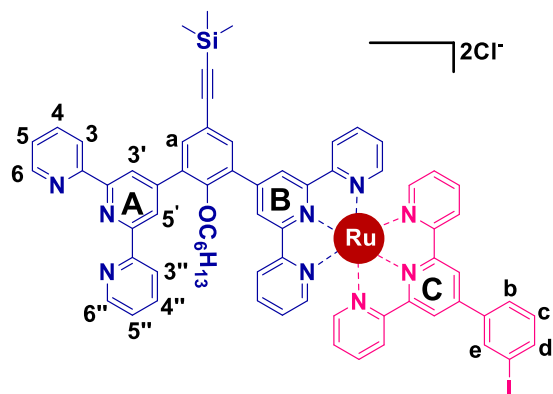

Compound **S-18**. Compound **S-8** (176 mg, 0.24 mmol) was dissolved in 50 mL  $\text{CHCl}_3$  and 50 mL MeOH, and compound **S-17** (76 mg, 0.12 mmol) was added. The suspension was stirred at room temperature for 1 h, then N-ethylmorpholine (500  $\mu\text{L}$ ) was added. The mixture was refluxed for 48 h. After cooling down to room temperature, the solvent was removed by evaporation. The crude was purified by column chromatography on neutral  $\text{Al}_2\text{O}_3$  with chloroform: methanol (100: 1) as eluent to afford the product as a red solid (140 mg, 85 % yield).  $^1\text{H}$  NMR (500 MHz,  $\text{CDCl}_3+3\% \text{CD}_3\text{OD}$ , 300 K)  $\delta$  9.17 (s, 2H,  $\text{tpy}^{\text{C}}\text{-H}^{3',5'}$ ), 9.05 (s, 2H,  $\text{tpy}^{\text{B}}\text{-H}^{3',5'}$ ), 8.95 (d,  $J = 8.2$  Hz, 2H,  $\text{tpy}^{\text{C}}\text{-H}^{3,3''}$ ), 8.79 (s, 2H,  $\text{tpy}^{\text{A}}\text{-H}^{3',5'}$ ), 8.75 – 8.68 (m, 4H,  $\text{tpy}^{\text{A}}\text{-H}^{6,6''}$ ,  $\text{tpy}^{\text{A}}\text{-H}^{3,3''}$ ), 8.65 (d,  $J = 8.1$  Hz, 2H,  $\text{tpy}^{\text{B}}\text{-H}^{3,3''}$ ), 8.50 (s, 1H, Ph- $\text{H}^{\text{e}}$ ), 8.42 (d,  $J = 7.8$  Hz, 2H, Ph- $\text{H}^{\text{d}}$ ), 8.16 (s, 1H, Ph- $\text{H}^{\text{f}}$ ), 8.07 – 7.95 (m, 5H,  $\text{tpy}^{\text{C}}\text{-H}^{4,4''}$ ,  $\text{tpy}^{\text{B}}\text{-H}^{4,4''}$ , Ph- $\text{H}^{\text{a}}$ ), 7.95 – 7.88 (m, 3H,  $\text{tpy}^{\text{A}}\text{-H}^{4,4''}$ , Ph- $\text{H}^{\text{a}}$ ), 7.85 (d,  $J = 7.8$  Hz, 2H, Ph- $\text{H}^{\text{b}}$ ), 7.52 – 7.36 (m, 5H,  $\text{tpy}^{\text{A}}\text{-H}^{5,5''}$ ,  $\text{tpy}^{\text{C}}\text{-H}^{6,6''}$ , Ph- $\text{H}^{\text{c}}$ ), 7.36 – 7.27 (m, 4H,  $\text{tpy}^{\text{C}}\text{-H}^{5,5''}$ ,  $\text{tpy}^{\text{B}}\text{-H}^{6,6''}$ ), 7.24 – 7.17 (m, 2H,  $\text{tpy}^{\text{B}}\text{-H}^{5,5''}$ ), 3.56 (t,  $J = 6.1$  Hz, 2H), 1.61 – 1.24 (m, 2H), 1.02 (m, 2H), 0.86 – 0.56 (m, 4H), 0.38 (q,  $J = 7.1, 5.5$  Hz, 3H), 0.26 (s, 9H).  $^{13}\text{C}$  NMR (125 MHz,  $\text{CDCl}_3+3\% \text{CD}_3\text{OD}$ , 300 K)  $\delta$  157.88, 157.49, 155.76, 155.64, 155.07, 154.78, 154.55, 152.23, 151.40, 149.05, 147.73, 146.91, 145.28, 139.20, 138.75, 138.42, 138.33, 137.12, 136.33, 136.20, 134.59, 134.47, 131.85, 131.43, 128.23, 128.13, 127.87, 125.90, 124.68, 124.11, 122.24, 121.47, 121.08, 120.79, 103.02, 96.19, 94.98, 75.04, 31.21, 29.98, 29.59, 25.81, 22.11, 13.60, -0.20. ESI-TOF ( $m/z$ ): Calcd.  $[\text{C}_{68}\text{H}_{58}\text{Cl}_2\text{IN}_9\text{ORuSi} - 2\text{Cl}]^{2+}$  for: 636.63, found: 636.59.

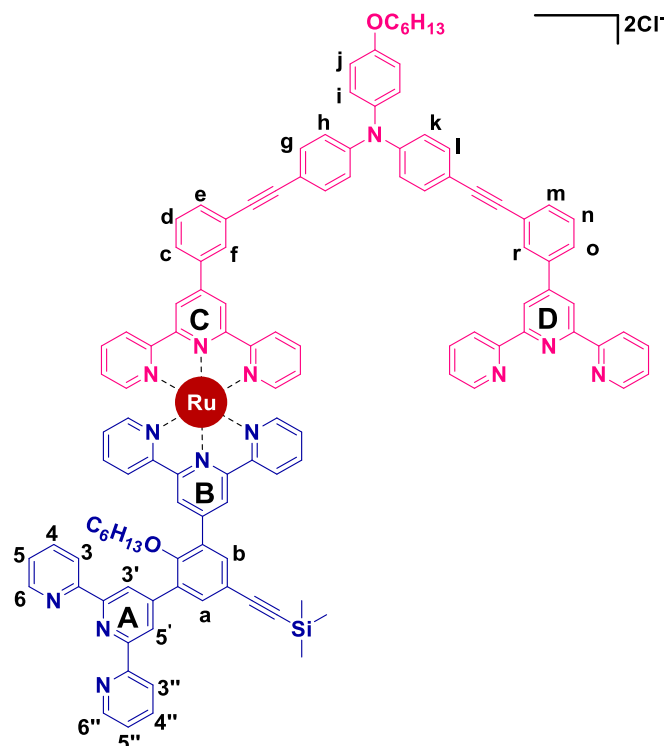

Compound **S-19**. Compound **S-18** (140 mg, 0.1 mmol), compound **S-15** (112 mg, 0.16 mmol), Pd(PPh<sub>3</sub>)<sub>4</sub> (3 mg, 5 μmol) and copper(I) iodide (0.4 mg, 4 μmol) was degassed under nitrogen for three times. After that, 20 mL anhydrous DMF, 10 mL anhydrous DME, 10 mL anhydrous Et<sub>3</sub>N was added and then the mixture was stirred at 80 °C overnight. After removal of solvent under vacuum, the crude was purified by column chromatography on neutral Al<sub>2</sub>O<sub>3</sub> with chloroform: methanol (100:1) as eluent to afford the product as a dark red solid (154 mg, 80 % yield). <sup>1</sup>H NMR (500 MHz, CDCl<sub>3</sub>+3% CD<sub>3</sub>OD, 300 K) δ 9.06 (s, 2H, tpy<sup>C</sup>-H<sup>3',5'</sup>), 8.96 (s, 2H, tpy<sup>B</sup>-H<sup>3',5'</sup>), 8.90 – 8.81 (m, 4H, tpy<sup>C</sup>-H<sup>3,3''</sup>, tpy<sup>A</sup>-H<sup>3',5'</sup>), 8.78 – 8.68 (m, 8H, tpy<sup>A</sup>-H<sup>6,6''</sup>, tpy<sup>A</sup>-H<sup>3,3''</sup>, tpy<sup>D</sup>-H<sup>3',5'</sup>, tpy<sup>D</sup>-H<sup>6,6''</sup>), 8.66 (dd, *J* = 7.9, 1.1 Hz, 2H, tpy<sup>D</sup>-H<sup>3,3''</sup>), 8.58-8.51 (m, 3H, tpy<sup>B</sup>-H<sup>3,3''</sup>, Ph-H<sup>c</sup>), 8.29 (d, *J* = 1.8 Hz, 1H, Ph-H<sup>f</sup>), 8.17 (d, *J* = 2.1 Hz, 1H, Ph-H<sup>b</sup>), 8.02 (d, *J* = 1.8 Hz, 1H, Ph-H<sup>a</sup>), 7.98 – 7.84 (m, 9H, tpy<sup>C</sup>-H<sup>4,4''</sup>, tpy<sup>B</sup>-H<sup>4,4''</sup>, tpy<sup>D</sup>-H<sup>4,4''</sup>, tpy<sup>A</sup>-H<sup>4,4''</sup>, Ph-H<sup>r</sup>), 7.81 (dt, *J* = 7.9, 1.4 Hz, 1H, Ph-H<sup>o</sup>), 7.71 – 7.51 (m, 7H, tpy<sup>C</sup>-H<sup>6,6''</sup>, tpy<sup>B</sup>-H<sup>6,6''</sup>, Ph-H<sup>d</sup>, Ph-H<sup>m</sup>, Ph-H<sup>e</sup>), 7.50 – 7.31 (m, 11H, tpy<sup>A</sup>-H<sup>5,5''</sup>, tpy<sup>B</sup>-H<sup>5,5''</sup>, tpy<sup>D</sup>-H<sup>5,5''</sup>, Ph-H<sup>g</sup>, Ph-H<sup>l</sup>, Ph-H<sup>n</sup>), 7.31 – 7.26 (m, 2H, tpy<sup>C</sup>-H<sup>5,5''</sup>), 7.08 (d, *J* = 8.9 Hz, 2H, Ph-H<sup>i</sup>), 7.05 – 6.97 (m, 4H, Ph-H<sup>k</sup>, Ph-H<sup>h</sup>), 6.87 (d, *J* = 9.0 Hz, 2H, Ph-H<sup>j</sup>), 3.94 (t, *J* = 6.5 Hz, 2H), 3.64 (t, *J* = 5.8 Hz, 2H), 1.81 – 1.68 (m, 2H), 1.50 – 1.38 (m, 2H), 1.38-1.29 (m, 8H), 1.05 (tt, *J* = 9.7, 6.2 Hz, 2H), 0.89 (t, *J* = 6.8 Hz, 3H), 0.81-0.76 (m, 2H), 0.72-0.65 (m, 2H), 0.39 (t, *J* = 7.2 Hz, 3H), 0.29 (s, 9H). <sup>13</sup>C NMR (125 MHz, CDCl<sub>3</sub>+3% CD<sub>3</sub>OD, 300 K) δ 157.68,

157.46, 156.63, 156.00, 155.93, 155.86, 155.65, 154.80, 154.67, 154.61, 152.88, 152.32, 149.45, 149.11, 149.06, 148.14, 147.63, 147.41, 146.93, 144.91, 138.95, 138.61, 138.21, 138.02, 136.96, 136.86, 136.69, 136.31, 134.58, 134.49, 132.98, 132.71, 132.60, 131.88, 131.81, 130.41, 130.17, 129.90, 128.93, 128.69, 128.37, 128.02, 126.82, 125.57, 124.75, 124.60, 124.42, 124.27, 124.01, 123.87, 122.56, 122.30, 122.07, 121.36, 121.32, 121.12, 120.75, 118.73, 116.17, 115.74, 115.55, 103.13, 96.22, 91.08, 90.21, 88.41, 88.13, 75.37, 68.21, 31.85, 31.53, 31.28, 30.04, 29.62, 29.22, 25.89, 25.69, 22.55, 22.15, 13.99, 13.68, -0.06. ESI-TOF ( $m/z$ ): Calcd.  $[\text{C}_{117}\text{H}_{97}\text{Cl}_2\text{N}_{13}\text{O}_2\text{RuSi} - 2\text{Cl}]^{2+}$  for: 922.84, found: 922.84.

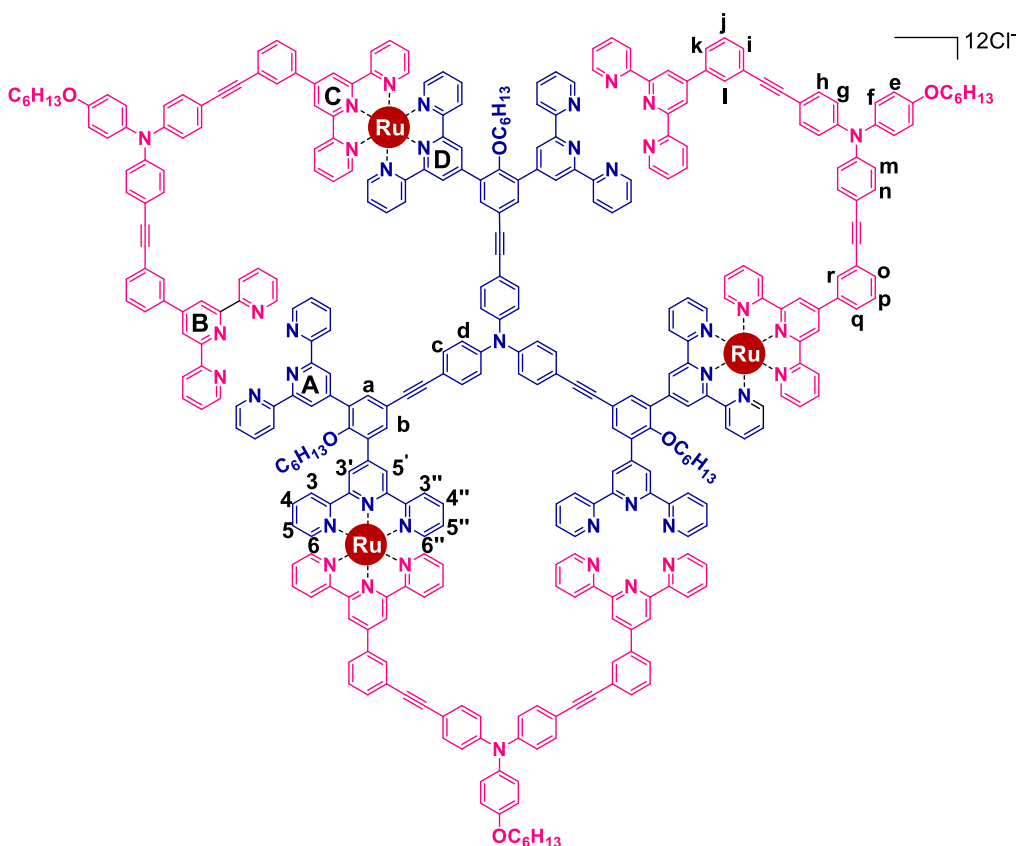

Compound **LB**. Compound **S-19** (300 mg, 0.16 mmol), compound **5** (28 mg, 0.048 mmol),  $\text{Pd}(\text{PPh}_3)_4$  (7 mg, 15  $\mu\text{mol}$ ) and copper(I) iodide (1.0 mg, 8  $\mu\text{mol}$ ) was degassed under nitrogen for three times. After that, 25 mL anhydrous DMF, 10 mL anhydrous DME, 15 mL anhydrous  $\text{Et}_3\text{N}$  was added at one time. After that, TBAF solution (0.2 mL, 1 M in THF) was added and the mixture was stirred at 80  $^\circ\text{C}$  for two days. After removal of solvent under vacuum, the crude was directly purified by column chromatography on neutral  $\text{Al}_2\text{O}_3$  with chloroform: methanol (100:3) as eluent to afford the product as a dark red solid (30 mg, 12 % yield).  $^1\text{H}$  NMR (500 MHz,  $\text{DMSO}-d_6$ , 300

K)  $\delta$  9.56 (s, 6H,  $\text{tpy}^{\text{C}}\text{-H}^{3',5'}$ ), 9.43 (s, 6H,  $\text{tpy}^{\text{D}}\text{-H}^{3',5'}$ ), 9.18 (d,  $J = 8.3$  Hz, 6H,  $\text{tpy}^{\text{C}}\text{-H}^{3,3''}$ ), 9.05 (d,  $J = 8.3$  Hz, 6H,  $\text{tpy}^{\text{D}}\text{-H}^{3,3''}$ ), 8.87 (s, 6H,  $\text{tpy}^{\text{A}}\text{-H}^{3',5'}$ ), 8.75-8.65 (m, 30H,  $\text{tpy}^{\text{A}}\text{-H}^{3,3''}$ ,  $\text{tpy}^{\text{A}}\text{-H}^{6,6''}$ ,  $\text{tpy}^{\text{B}}\text{-H}^{3',5'}$ ,  $\text{tpy}^{\text{B}}\text{-H}^{3,3''}$ ,  $\text{tpy}^{\text{B}}\text{-H}^{6,6''}$ ), 8.60 (s, 3H, Ph- $H^{\text{r}}$ ), 8.45 (s, 3H, Ph- $H^{\text{q}}$ ), 8.25 (s, 3H, Ph- $H^{\text{b}}$ ), 8.16 – 7.99 (m, 33H,  $\text{tpy}^{\text{C}}\text{-H}^{4,4''}$ ,  $\text{tpy}^{\text{D}}\text{-H}^{4,4''}$ ,  $\text{tpy}^{\text{A}}\text{-H}^{4,4''}$ ,  $\text{tpy}^{\text{B}}\text{-H}^{4,4''}$ , Ph- $H^{\text{a}}$ , Ph- $H^{\text{l}}$ , Ph- $H^{\text{o}}$ ), 7.95 (d,  $J = 7.6$  Hz, 6H, Ph- $H^{\text{h}}$ ), 7.81 (m, 6H, Ph- $H^{\text{k}}$ , Ph- $H^{\text{p}}$ ), 7.73 – 7.62 (m, 9H, Ph- $H^{\text{n}}$ , Ph- $H^{\text{i}}$ ), 7.62 – 7.45 (m, 30H,  $\text{tpy}^{\text{C}}\text{-H}^{6,6''}$ ,  $\text{tpy}^{\text{D}}\text{-H}^{6,6''}$ ,  $\text{tpy}^{\text{A}}\text{-H}^{5,5''}$ ,  $\text{tpy}^{\text{B}}\text{-H}^{5,5''}$ , Ph- $H^{\text{c}}$ ), 7.30 (m, 12H,  $\text{tpy}^{\text{C}}\text{-H}^{5,5''}$ ,  $\text{tpy}^{\text{D}}\text{-H}^{5,5''}$ ), 7.20 (m, 3H, Ph- $H^{\text{j}}$ ), 7.13 (m, 6H, Ph- $H^{\text{f}}$ ), 7.03 (m, 24H, Ph- $H^{\text{d}}$ , Ph- $H^{\text{e}}$ , Ph- $H^{\text{m}}$ , Ph- $H^{\text{s}}$ ), 3.97 (m, 6H), 3.66 (m, 6H), 1.71 (q,  $J = 7.1$  Hz, 6H), 1.49 – 1.18 (m, 24H), 1.06 (m, 6H), 0.93 – 0.70 (m, 12H), 0.57 (t,  $J = 7.5$  Hz, 9H), 0.22 (t,  $J = 7.2$  Hz, 9H).  $^{13}\text{C}$  NMR (100 MHz, DMSO- $d_6$ , 300 K)  $\delta$  158.57, 158.30, 157.09, 156.15, 155.74, 155.53, 155.32, 155.16, 155.05, 152.83, 149.80, 149.12, 147.85, 147.64, 147.12, 147.01, 146.59, 144.57, 138.57, 138.16, 137.13, 134.55, 133.90, 133.58, 133.40, 133.32, 133.21, 132.50, 130.77, 130.46, 129.89, 129.02, 128.30, 127.63, 125.19, 124.72, 124.32, 124.15, 122.53, 122.19, 121.95, 121.53, 121.33, 119.98, 118.61, 117.44, 117.03, 116.40, 115.80, 115.33, 91.09, 90.78, 88.90, 88.77, 79.65, 74.93, 68.15, 52.41, 31.48, 31.33, 29.95, 29.16, 25.97, 25.70, 22.57, 22.14, 14.42, 13.85. ESI-TOF ( $m/z$ ): Calcd.  $[\text{C}_{360}\text{H}_{276}\text{Cl}_6\text{N}_{40}\text{O}_6\text{Ru}_3 - 6\text{Cl}]^{6+}$  for: 927.00, found: 926.94.

Compound **S-20**. Compound **S-20** was synthesized using the same method as **S-17**. Compound **S-8** (109 mg, 0.25 mmol) was dissolved in 30 mL  $\text{CHCl}_3$  and 30 mL MeOH.  $\text{RuCl}_3 \cdot x\text{H}_2\text{O}$  (315 mg, 1 mmol) was added and the suspension was refluxed for 48h. After cooling down, the resultant dark red solid was filtered, washed with MeOH by centrifugation, and dried in vacuum to afford the product as a dark red solid (156 mg, 69 % yield). This material was used without characterization due to its poor solubility.

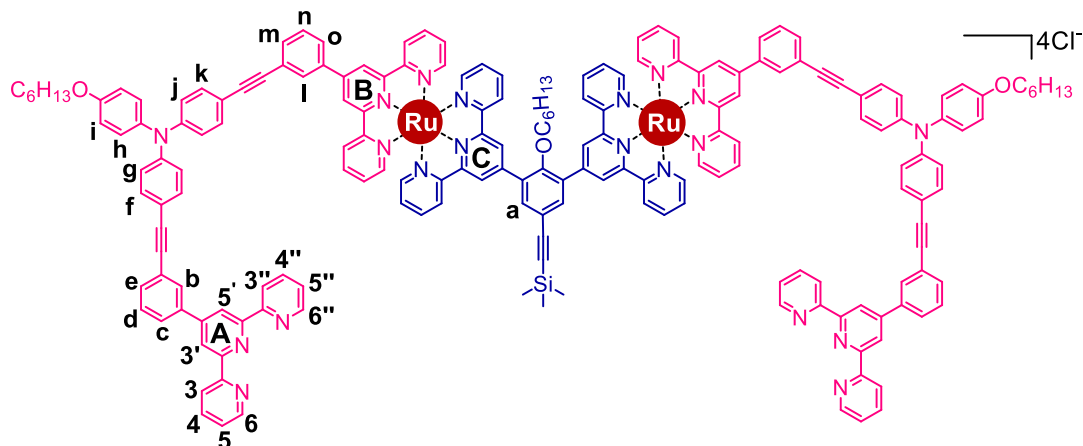

Compound **S-21**. Compound **S-20** (170 mg, 0.14 mmol) was dissolved in 50 mL CHCl<sub>3</sub> and 50 mL MeOH, and compound **LA** (330 mg, 0.32 mmol) was added. The suspension was stirred at room temperature for 1 h, then N-ethylmorpholine (500 μL) was added. The mixture was refluxed for 48 h. After cooling down to room temperature, the solvent was removed by evaporation. The crude was purified by column chromatography on neutral Al<sub>2</sub>O<sub>3</sub> with chloroform: methanol (100:2) as eluent to afford the product as a red solid (114 mg, 24 % yield). <sup>1</sup>H NMR (400 MHz, CDCl<sub>3</sub>+3% CD<sub>3</sub>OD, 300 K) δ 9.72 (s, 4H, tpy<sup>C</sup>-H<sup>3',5'</sup>), 9.29 (d, *J* = 8.2 Hz, 4H, tpy<sup>C</sup>-H<sup>3,3''</sup>), 9.17 (s, 4H, tpy<sup>B</sup>-H<sup>3',5'</sup>), 8.91 (d, *J* = 7.9 Hz, 4H, tpy<sup>B</sup>-H<sup>3,3''</sup>), 8.74 – 8.57 (m, 12H, tpy<sup>A</sup>-H<sup>3',5'</sup>, tpy<sup>A</sup>-H<sup>6,6''</sup>, tpy<sup>A</sup>-H<sup>3,3''</sup>), 8.42 (s, 2H, Ph-H<sup>a</sup>), 8.22 (s, 2H, Ph-H<sup>b</sup>), 8.18 (s, 2H, Ph-H<sup>l</sup>), 7.98-8.06 (m, 12H, tpy<sup>C</sup>-H<sup>4,4''</sup>, tpy<sup>B</sup>-H<sup>4,4''</sup>, Ph-H<sup>c</sup>, Ph-H<sup>o</sup>), 7.92 – 7.79 (m, 6H, tpy<sup>A</sup>-H<sup>4,4''</sup>, Ph-H<sup>m</sup>), 7.71 (d, *J* = 4.3 Hz, 2H, Ph-H<sup>k</sup>), 7.56 (d, *J* = 7.6 Hz, 2H, Ph-H<sup>e</sup>), 7.52 – 7.31 (m, 20H, tpy<sup>A</sup>-H<sup>5,5''</sup>, tpy<sup>C</sup>-H<sup>6,6''</sup>, tpy<sup>B</sup>-H<sup>6,6''</sup>, Ph-H<sup>d</sup>, Ph-H<sup>n</sup>, Ph-H<sup>f</sup>), 7.25 (m, 8H, tpy<sup>C</sup>-H<sup>5,5''</sup>, tpy<sup>B</sup>-H<sup>5,5''</sup>), 7.08 (d, *J* = 8.9 Hz, 2H, Ph-H<sup>h</sup>), 7.03 (d, *J* = 8.6 Hz, 8H, Ph-H<sup>g</sup>, Ph-H<sup>i</sup>), 6.87 (d, *J* = 8.9 Hz, 2H, Ph-H<sup>j</sup>), 3.94 (t, *J* = 6.5 Hz, 4H), 1.76 (m, 4H), 1.49 – 1.27 (m, 12H), 0.89 (m, 6H), -0.04 (s, 9H). <sup>13</sup>C NMR (100 MHz, DMSO-*d*<sub>6</sub>, 300 K) δ 158.63, 158.44, 157.09, 156.25, 155.59, 155.56, 155.28, 155.14, 155.07, 152.78, 152.33, 149.85, 149.09, 147.84, 147.65, 146.55, 145.12, 144.24, 138.67, 138.59, 138.03, 137.12, 133.50, 133.32, 133.22, 132.80, 132.48, 130.78, 130.46, 129.88, 129.02, 128.33, 128.27, 128.24, 127.61, 125.60, 125.49, 125.14, 124.32, 124.16, 122.53, 122.20, 121.96, 121.46, 118.54, 116.40, 115.79, 115.36, 91.08, 90.78, 88.92, 88.77, 68.15, 31.49, 29.16, 25.70, 22.58, 14.43, 0.43. ESI-TOF (*m/z*): Calcd. [C<sub>187</sub>H<sub>150</sub>ClN<sub>20</sub>O<sub>3</sub>Ru<sub>2</sub>Si – 3Cl]<sup>3+</sup> for: 996.99, found: 996.94. Calcd. [C<sub>187</sub>H<sub>150</sub>N<sub>20</sub>O<sub>3</sub>Ru<sub>2</sub>Si – 4Cl]<sup>4+</sup> for: 739.00, found: 738.96.

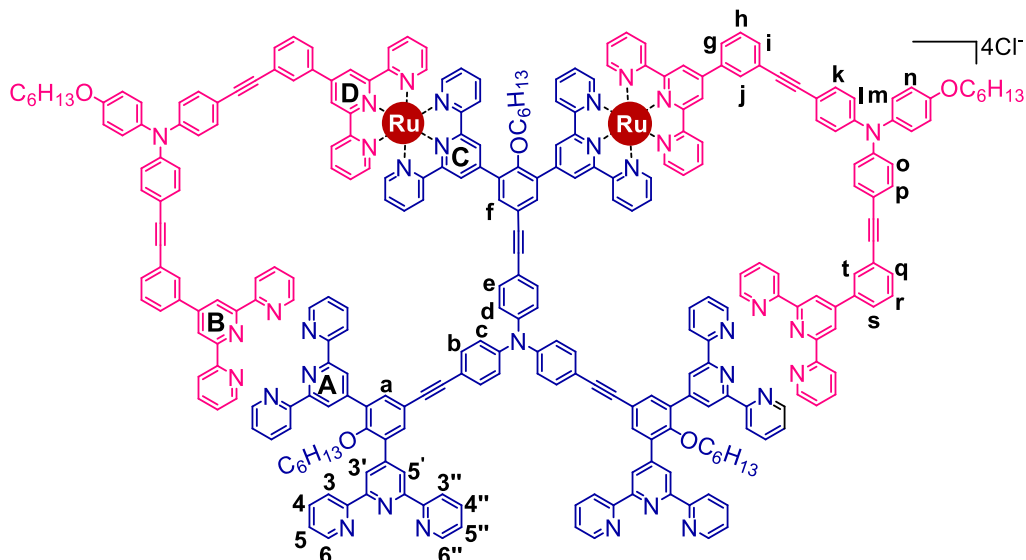

Compound **LC**. Compound **S-21** (55 mg, 0.018 mmol), compound **S-13** (43 mg, 0.027 mmol), Pd(PPh<sub>3</sub>)<sub>4</sub> (3 mg, 7 μmol) and copper(I) iodide (0.5 mg, 4 μmol) was degassed under nitrogen for three times. After that, 20 mL anhydrous DMF, 10 mL anhydrous DME, 15mL anhydrous Et<sub>3</sub>N was added at one time. After that, TBAF solution (0.1 mL, 1 M in THF) was added and the mixture was stirred at 80 °C overnight. After removal of solvent under vacuum, the crude was directly purified by column chromatography on neutral Al<sub>2</sub>O<sub>3</sub> with chloroform: methanol (100:2) as eluent to afford the product as a dark red solid (15 mg, 12 % yield). <sup>1</sup>H NMR (500 MHz, DMSO-*d*<sub>6</sub>, 300 K) δ 9.78 (s, 4H, tpy<sup>C</sup>-H<sup>3',5'</sup>), 9.61 (s, 4H, tpy<sup>D</sup>-H<sup>3',5'</sup>), 9.28 (d, *J* = 8.0 Hz, 4H, tpy<sup>C</sup>-H<sup>3,3''</sup>), 9.23 (d, *J* = 8.1 Hz, 4H, tpy<sup>D</sup>-H<sup>3,3''</sup>), 8.88 – 8.64 (m, 36H, tpy<sup>A</sup>-H<sup>3',5'</sup>, tpy<sup>A</sup>-H<sup>3,3''</sup>, tpy<sup>A</sup>-H<sup>6,6''</sup>, tpy<sup>B</sup>-H<sup>3',5'</sup>, tpy<sup>B</sup>-H<sup>3,3''</sup>, tpy<sup>B</sup>-H<sup>6,6''</sup>), 8.64 (s, 2H, Ph-H<sup>i</sup>), 8.51 (s, 2H, Ph-H<sup>g</sup>), 8.43 (s, 2H, Ph-H<sup>f</sup>), 8.18 – 8.02 (m, 20H, tpy<sup>C</sup>-H<sup>4,4''</sup>, tpy<sup>D</sup>-H<sup>4,4''</sup>, tpy<sup>A</sup>-H<sup>4,4''</sup>, tpy<sup>B</sup>-H<sup>4,4''</sup>), 7.97 (m, 4H, Ph-H<sup>l</sup>, Ph-H<sup>j</sup>), 7.90 (s, 4H, Ph-H<sup>a</sup>), 7.82 (m, 6H, Ph-H<sup>k</sup>, Ph-H<sup>h</sup>), 7.75(m, 6H, Ph-H<sup>e</sup>, Ph-H<sup>p</sup>), 7.71 – 7.59 (m, 12H, tpy<sup>C</sup>-H<sup>6,6''</sup>, Ph-H<sup>s</sup>, Ph-H<sup>b</sup>, Ph-H<sup>q</sup>), 7.55 (m, 18H, tpy<sup>D</sup>-H<sup>6,6''</sup>, tpy<sup>A</sup>-H<sup>5,5''</sup>, tpy<sup>B</sup>-H<sup>5,5''</sup>, Ph-H<sup>r</sup>), 7.34 (m, 8H, tpy<sup>C</sup>-H<sup>5,5''</sup>, tpy<sup>D</sup>-H<sup>5,5''</sup>), 7.22 – 7.12 (m, 10H, Ph-H<sup>d</sup>, Ph-H<sup>l</sup>, Ph-H<sup>m</sup>), 7.11 – 6.97 (m, 12H, Ph-H<sup>c</sup>, Ph-H<sup>n</sup>, Ph-H<sup>o</sup>), 4.14 – 3.79 (m, 6H), 3.41 (m, 4H), 1.73 (m, 4H), 1.43 (m, 6H), 1.32 (m, 10H), 1.15 (m, 12H), 1.00 – 0.77 (m, 8H), 0.62 (m, 6H), 0.39 (t, *J* = 6.7 Hz, 6H), 0.12 (t, *J* = 7.3 Hz, 3H). <sup>13</sup>C NMR (100 MHz, DMSO-*d*<sub>6</sub>, 300 K) δ 158.61, 158.33, 157.09, 156.25, 155.60, 155.53, 155.32, 155.27, 155.14, 154.75, 149.85, 149.10, 147.86, 147.64, 147.15, 146.83, 146.63, 144.23, 138.61, 138.58, 138.03, 137.13, 134.63, 134.27, 133.62, 133.32, 133.21, 132.48, 130.77, 130.46, 129.88, 129.02, 128.21, 127.62, 125.14, 125.08, 124.81, 124.33, 124.15, 122.55, 122.18, 121.47, 121.33, 119.97,



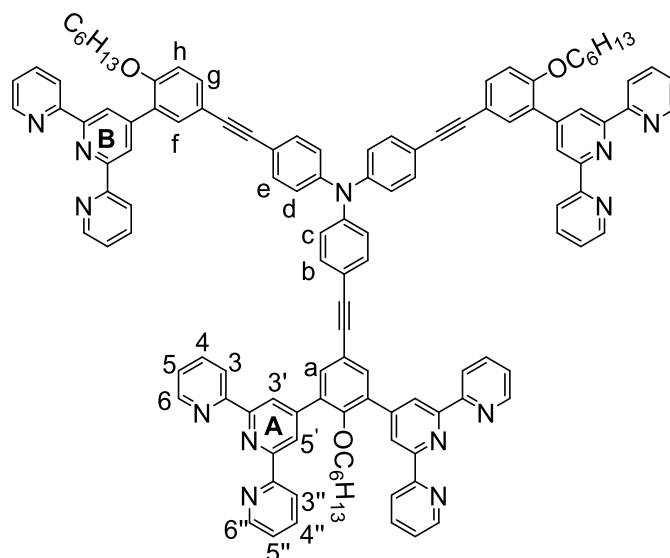

Compound **LD**. Compound **S-22** (300 mg, 0.26 mmol), compound **S-6** (433 mg, 1 mmol), Pd(PPh<sub>3</sub>)<sub>4</sub> (70 mg, 0.06 mmol) and copper(I) iodide (10 mg, 0.05 mmol) was degassed under nitrogen for three times. After that, anhydrous THF (30 mL), anhydrous Et<sub>3</sub>N (15 mL) was added and then the mixture was stirred at 70 °C for two days. Then the solvent was removed, and the residue was extracted with CHCl<sub>3</sub>. The combined organic phase was washed with brine and dried with anhydrous Na<sub>2</sub>SO<sub>4</sub>. After removal of solvent under vacuum, the crude was purified by column chromatography on silica gel with chloroform: ethanol (100:3) as eluent to afford the product as a brown solid (100 mg, 22 % yield). <sup>1</sup>H NMR (500 MHz, , CDCl<sub>3</sub>, 300 K) δ 8.82 (s, 4H, tpy<sup>A</sup>-H<sup>3',5'</sup>), 8.75(m, 4H, tpy<sup>A</sup>-H<sup>6,6''</sup>), 8.73 – 8.63 (m, 16H, tpy<sup>B</sup>-H<sup>3',5'</sup>, tpy<sup>B</sup>-H<sup>6,6''</sup>, tpy<sup>A</sup>-H<sup>3,3''</sup>, tpy<sup>B</sup>-H<sup>3,3''</sup>), 7.95 – 7.81 (m, 10H, tpy<sup>A</sup>-H<sup>4,4''</sup>, tpy<sup>B</sup>-H<sup>4,4''</sup>, Ph-H<sup>a</sup>), 7.77 (d, *J* = 2.1 Hz, 2H, Ph-H<sup>f</sup>), 7.53 (dd, *J* = 8.6, 2.1 Hz, 2H, Ph-H<sup>e</sup>), 7.46 (m, 6H, Ph-H<sup>c</sup>, Ph-H<sup>d</sup>), 7.34 (ddd, *J* = 15.2, 7.5, 4.9 Hz, 10H, tpy<sup>A</sup>-H<sup>5,5''</sup>, tpy<sup>B</sup>-H<sup>5,5''</sup>, Ph-H<sup>b</sup>), 7.10 (d, *J* = 8.2 Hz, 4H, Ph-H<sup>e</sup>), 6.97 (d, *J* = 8.6 Hz, 2H, Ph-H<sup>h</sup>), 4.04 (t, *J* = 6.2 Hz, 4H), 3.39 (t, *J* = 6.0 Hz, 2H), 1.73 (dd, *J* = 9.0, 6.2 Hz, 4H), 1.40 (m, *J* = 7.6 Hz, 4H), 1.16 (m, 10H), 0.93 (m, *J* = 7.5 Hz, 2H), 0.73 (m, 10H), 0.50 (t, *J* = 6.7 Hz, 3H). <sup>13</sup>C NMR (125 MHz, CDCl<sub>3</sub>, 300 K) δ 156.44, 156.31, 156.23, 155.48, 155.14, 154.68, 149.19, 149.08, 147.78, 147.64, 146.84, 146.50, 136.79, 136.72, 134.23, 134.18, 133.79, 133.21, 132.79, 132.65, 128.51, 124.13, 123.88, 123.74, 123.56, 121.81, 121.63, 121.26, 121.20, 119.81, 118.23, 117.60, 115.72, 112.18, 89.87, 88.96, 88.44, 88.23, 74.42, 68.66, 31.51, 31.32, 29.74, 29.08, 25.77, 25.42, 22.34, 22.12, 13.90, 13.77. ESI-TOF (*m/z*): Calcd. [C<sub>120</sub>H<sub>99</sub>N<sub>13</sub>O<sub>3</sub> + 2H]<sup>2+</sup> for: 886.41, found: 886.40. Calcd. [C<sub>120</sub>H<sub>99</sub>N<sub>13</sub>O<sub>3</sub> + 3H]<sup>3+</sup> for: 591.28, found: 591.26.



Compound **7**. Compound **7** was synthesized according to a literature method.<sup>13</sup> A nitrogen purged flask containing a solution of compound **LA** (151 mg, 0.15 mmol) and Ru(DMSO)<sub>4</sub>Cl<sub>2</sub> (290 mg, 0.6 mmol) in 100 mL 1,2-dichloroethane was heated at reflux for two days. The solvent was removed, and the residue was washed with methanol by centrifugation for three times. About 200 mg dark red solid (88%) was obtained after dried in vacuum. The solid was used directly for further steps without characterization.

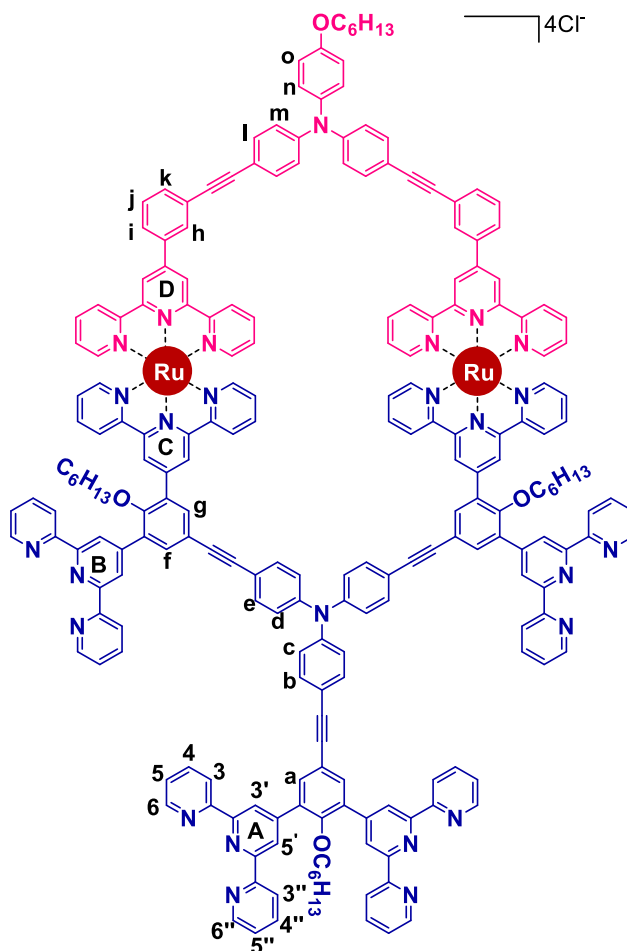

Compound **LE**. A flask containing a solution of compound **7** (48 mg, 0.032 mmol) and compound **L** (121 mg, 0.054 mmol) in 30 mL 1,2-dichloroethane and 30 mL ethanol was heated at reflux for two days. The solvent was removed, and the residue was purified by column chromatography on neutral aluminum oxide with chloroform: methanol (100:4) as eluent to afford the product as a dark red solid (18 mg, 13 % yield). <sup>1</sup>H NMR (500 MHz, DMSO-*d*<sub>6</sub>, 300 K) δ 9.63 (s, 4H, tpy<sup>D</sup>-*H*<sup>3',5'</sup>), 9.45 (s, 4H, tpy<sup>C</sup>-*H*<sup>3',5'</sup>), 9.26 (d, *J* = 8.4 Hz, 4H, tpy<sup>D</sup>-*H*<sup>3,3''</sup>), 9.07 (d, *J* = 8.2 Hz, 4H, tpy<sup>C</sup>-

$H^{3,3''}$ ), 8.90 (s, 4H, tpy<sup>B</sup>- $H^{3,5'}$ ), 8.84 – 8.65 (m, 22H, tpy<sup>A</sup>- $H^{3,5'}$ , tpy<sup>A</sup>- $H^{3,3''}$ , tpy<sup>A</sup>- $H^{6,6''}$ , tpy<sup>B</sup>- $H^{3,3''}$ , tpy<sup>B</sup>- $H^{6,6''}$ , Ph- $H^h$ ), 8.55 (d,  $J = 7.1$  Hz, 2H, Ph- $H^i$ ), 8.25 (s, 2H, Ph- $H^e$ ), 8.09 (m, 16H, tpy<sup>C</sup>- $H^{4,4''}$ , tpy<sup>D</sup>- $H^{4,4''}$ , tpy<sup>A</sup>- $H^{4,4''}$ , tpy<sup>B</sup>- $H^{4,4''}$ ), 7.92 (s, 2H, Ph- $H^f$ ), 7.83 (m, 4H, Ph- $H^a$ , Ph- $H^j$ ), 7.68-7.48 (m, 26H, tpy<sup>C</sup>- $H^{6,6''}$ , tpy<sup>D</sup>- $H^{6,6''}$ , tpy<sup>A</sup>- $H^{5,5''}$ , tpy<sup>B</sup>- $H^{5,5''}$ , Ph- $H^k$ , Ph- $H^l$ , Ph- $H^c$ ), 7.32 (m, 8H, tpy<sup>C</sup>- $H^{5,5''}$ , tpy<sup>D</sup>- $H^{5,5''}$ ), 7.19 (m, 8H, Ph- $H^n$ , Ph- $H^d$ , Ph- $H^b$ ), 7.08 (m, 8H, Ph- $H^o$ , Ph- $H^c$ , Ph- $H^m$ ), 4.02 (m, 2H), 3.73 (m, 4H), 1.76 (m, 2H), 1.58 – 1.20 (m, 10H), 1.12 (m, 6H), 0.98 – 0.77 (m, 12H), 0.64 (m, 8H), 0.41 (t,  $J = 7.4$  Hz, 3H), 0.27 (t,  $J = 7.3$  Hz, 6H). <sup>13</sup>C NMR (100 MHz, DMSO-*d*<sub>6</sub>, 300 K)  $\delta$  158.58, 158.30, 157.17, 155.76, 155.62, 155.56, 155.35, 155.03, 154.77, 152.78, 152.42, 149.86, 147.81, 147.17, 146.73, 146.41, 144.83, 138.63, 138.41, 138.08, 136.97, 135.77, 134.64, 134.48, 134.30, 133.95, 133.65, 133.49, 133.26, 131.28, 130.40, 128.99, 128.32, 128.12, 125.63, 125.18, 125.09, 124.84, 124.49, 124.30, 122.41, 121.84, 121.48, 121.34, 119.99, 117.83, 117.22, 116.45, 115.58, 90.95, 90.66, 90.45, 88.92, 88.66, 88.35, 75.00, 74.42, 68.19, 31.51, 31.35, 31.12, 29.94, 29.60, 29.18, 25.96, 25.72, 25.44, 22.60, 22.20, 22.04, 14.45, 14.03, 13.89. ESI-TOF ( $m/z$ ): Calcd. [C<sub>220</sub>H<sub>170</sub>Cl<sub>4</sub>N<sub>26</sub>O<sub>4</sub>Ru<sub>2</sub> – 3Cl]<sup>3+</sup> for: 1159.73, found: 1159.76. Calcd. [C<sub>220</sub>H<sub>170</sub>Cl<sub>4</sub>N<sub>26</sub>O<sub>4</sub>Ru<sub>2</sub> – 4Cl]<sup>4+</sup> for: 861.05, found: 861.03.

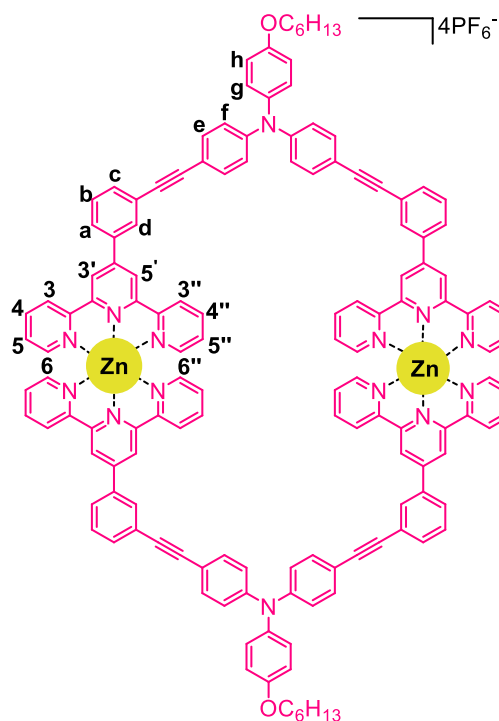

Complex **G1** [Zn<sub>2</sub>LA<sub>2</sub>]: To a solution of ligand **LA** (4.7 mg, 4.7  $\mu$ mol) in CHCl<sub>3</sub> (1.0 mL), a solution of Zn(NO<sub>3</sub>)<sub>2</sub>•6H<sub>2</sub>O (1.4 mg, 4.7  $\mu$ mol) in MeOH (3.0 mL) was added slowly. The mixture was heated at 50 °C for 10 h and then cooled down to room temperature. The mixture was then

added to a solution of  $\text{NH}_4\text{PF}_6$  (30 mg in 20 mL MeOH). After a while, a precipitate was formed, washed with MeOH for three times by centrifugation, dried in vacuum to give the product as a brown solid (5.9 mg, 93 % yield).  $^1\text{H}$  NMR (500 MHz,  $\text{CD}_3\text{CN}$ , 300 K)  $\delta$  9.02 (d,  $J = 3.0$  Hz, 8H, tpy- $H^{3',5'}$ ), 8.75 (dd,  $J = 8.3, 3.7$  Hz, 8H, tpy- $H^{3,3''}$ ), 8.36 (d,  $J = 4.4$  Hz, 4H, Ph- $H^d$ ), 8.19 (m, 12H, tpy- $H^{4,4''}$ , Ph- $H^a$ ), 7.94 – 7.71 (m, 16H, tpy- $H^{6,6''}$ , Ph- $H^c$ , Ph- $H^b$ ), 7.53 (m, 8H, Ph- $H^e$ ), 7.44 (m, 8H, tpy- $H^{5,5''}$ ), 7.26 – 7.05 (m, 12H, Ph- $H^g$ , Ph- $H^f$ ), 7.00 (d,  $J = 8.5$  Hz, Ph- $H^h$ ), 4.02 (t,  $J = 6.3$  Hz, 4H), 1.88 – 1.69 (m, 4H), 1.50 (m, 4H), 1.51 – 1.20 (m, 8H), 0.94 (t,  $J = 6.1$  Hz, 6H).  $^{13}\text{C}$  NMR (125 MHz,  $\text{CD}_3\text{CN}$ , 300 K)  $\delta$  158.17, 156.53, 150.93, 149.04, 148.83, 142.27, 139.77, 137.71, 134.60, 133.67, 131.69, 131.01, 129.56, 129.47, 128.82, 128.57, 125.80, 124.27, 123.25, 122.72, 116.80, 116.58, 91.67, 88.73, 69.20, 32.30, 29.94, 26.41, 23.32, 14.32. ESI-TOF ( $m/z$ ): 1218.3 [ $\text{M}-2\text{PF}_6^-$ ] $^{2+}$  (calcd  $m/z$ : 1218.3), 763.9 [ $\text{M}-3\text{PF}_6^-$ ] $^{3+}$  (calcd  $m/z$ : 763.9), 536.7 [ $\text{M}-4\text{PF}_6^-$ ] $^{4+}$  (calcd  $m/z$ : 536.7).

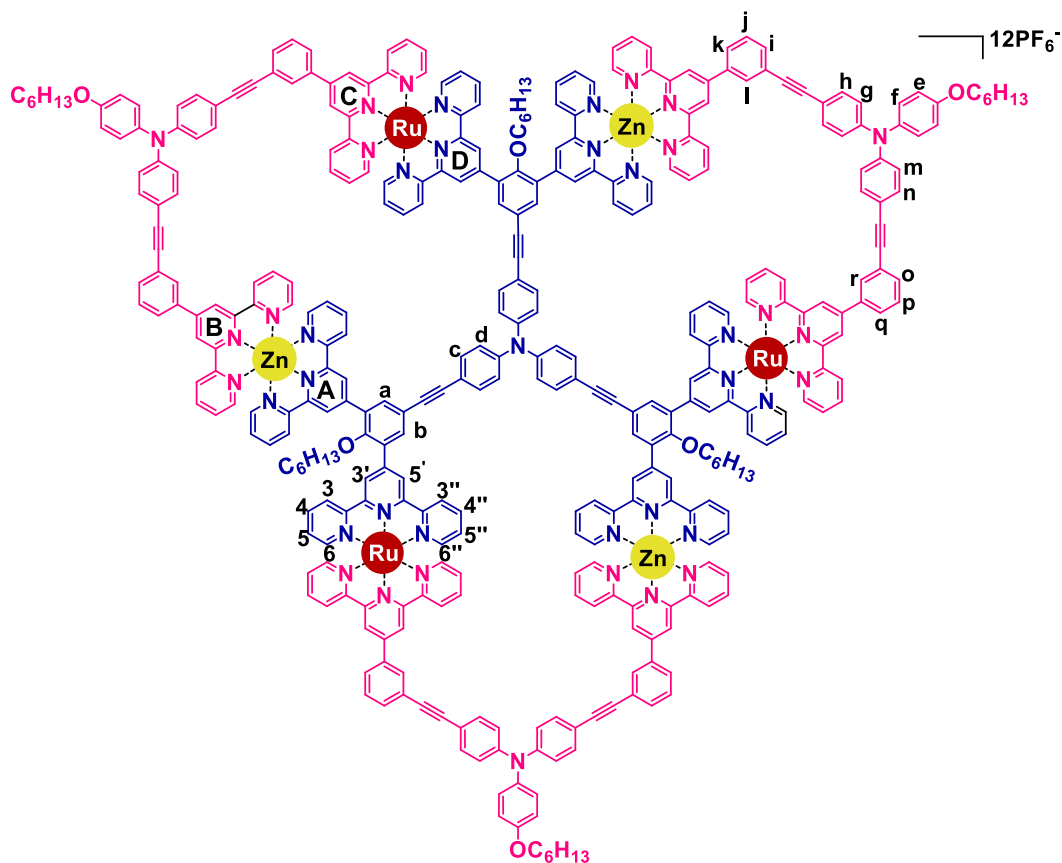

**Complex G2 [ $\text{Zn}_3\text{LB}$ ]:** To a solution of ligand **LB** (4.0 mg, 0.69  $\mu\text{mol}$ ) in  $\text{CHCl}_3$  (1.0 mL), a solution of  $\text{Zn}(\text{NO}_3)_2 \cdot 6\text{H}_2\text{O}$  (0.61 mg, 2.1  $\mu\text{mol}$ ) in MeOH (3.0 mL) was added slowly. The

mixture was heated at 50 °C for 10 h and then cooled down to room temperature. The mixture was then added to a solution of  $\text{NH}_4\text{PF}_6$  (50 mg in 15 mL MeOH). After a while, a precipitate was formed, washed with MeOH for three times by centrifugation, dried in vacuum to give the product as a red solid (4.9 mg, 94 % yield).  $^1\text{H}$  NMR (500 MHz,  $\text{CD}_3\text{CN}$ , 300 K)  $\delta$  9.23 (m, 12H, tpy<sup>D</sup>- $H^{3',5'}$ , tpy<sup>A</sup>- $H^{3',5'}$ ), 9.07 (m, 12H, tpy<sup>B</sup>- $H^{3',5'}$ , tpy<sup>C</sup>- $H^{3',5'}$ ), 8.79-8.68 (br, 24H, tpy<sup>D</sup>- $H^{3,3''}$ , tpy<sup>B</sup>- $H^{3,3''}$ , tpy<sup>A</sup>- $H^{3,3''}$ , tpy<sup>C</sup>- $H^{3,3''}$ ), 8.47 – 8.14 (br, 30H, Ph- $H^l$ , Ph- $H^r$ , Ph- $H^a$ , Ph- $H^b$ , tpy<sup>D</sup>- $H^{4,4''}$ , tpy<sup>B</sup>- $H^{4,4''}$ , Ph- $H^k$ , Ph- $H^q$ ), 8.04 – 7.76 (m, 36H, tpy<sup>A</sup>- $H^{4,4''}$ , tpy<sup>C</sup>- $H^{4,4''}$ , tpy<sup>D</sup>- $H^{6,6''}$ , tpy<sup>B</sup>- $H^{6,6''}$ , Ph- $H^p$ , Ph- $H^j$ , Ph- $H^o$ , Ph- $H^i$ ), 7.66 (d,  $J = 8.2$  Hz, 6H, Ph- $H^c$ ), 7.58 – 7.39 (m, 36H, tpy<sup>A</sup>- $H^{6,6''}$ , tpy<sup>C</sup>- $H^{6,6''}$ , tpy<sup>D</sup>- $H^{5,5''}$ , tpy<sup>B</sup>- $H^{5,5''}$ , Ph- $H^n$ , Ph- $H^h$ ), 7.35 – 7.07 (m, 36H, tpy<sup>A</sup>- $H^{5,5''}$ , tpy<sup>C</sup>- $H^{5,5''}$ , Ph- $H^d$ , Ph- $H^f$ , Ph- $H^m$ , Ph- $H^e$ ), 7.01 (d,  $J = 8.4$  Hz, 6H, Ph- $H^c$ ), 4.04 (t,  $J = 6.6$  Hz, 6H), 3.89 – 3.73 (m, 6H), 1.80 (q,  $J = 7.1$  Hz, 6H), 1.60 – 1.15 (m, 34H), 1.02 – 0.79 (m, 17H), 0.73 (m, 3H), 0.33 (t,  $J = 7.4$  Hz, 6H).  $^{13}\text{C}$  NMR (125 MHz,  $\text{CD}_3\text{CN}$ , 300 K)  $\delta$  157.28, 157.15, 156.25, 154.56, 154.31, 152.27, 152.04, 151.15, 148.99, 148.61, 147.74, 147.46, 146.93, 146.62, 146.19, 140.88, 140.03, 137.69, 136.89, 136.39, 135.78, 132.51, 132.06, 131.40, 129.51, 128.78, 127.83, 127.03, 126.36, 124.26, 123.86, 123.14, 122.90, 121.96, 121.62, 121.36, 121.09, 120.43, 119.81, 89.69, 86.93, 86.74, 86.39, 67.29, 31.16, 30.38, 29.61, 29.24, 28.78, 28.44, 28.03, 27.27, 25.94, 25.19, 24.50, 23.74, 21.43, 21.22, 20.68, 20.38, 12.81, 12.41, 12.04, 11.27. ESI-TOF ( $m/z$ ): 1104.6 [ $\text{M}-6\text{PF}_6^-$ ]<sup>6+</sup> (calcd  $m/z$ : 1104.6), 926.1 [ $\text{M}-7\text{PF}_6^-$ ]<sup>7+</sup> (calcd  $m/z$ : 926.1), 792.2 [ $\text{M}-8\text{PF}_6^-$ ]<sup>8+</sup> (calcd  $m/z$ : 792.2), 688.1 [ $\text{M}-9\text{PF}_6^-$ ]<sup>9+</sup> (calcd  $m/z$ : 688.1), 604.8 [ $\text{M}-10\text{PF}_6^-$ ]<sup>10+</sup> (calcd  $m/z$ : 604.8), 536.6 [ $\text{M}-11\text{PF}_6^-$ ]<sup>11+</sup> (calcd  $m/z$ : 536.6).

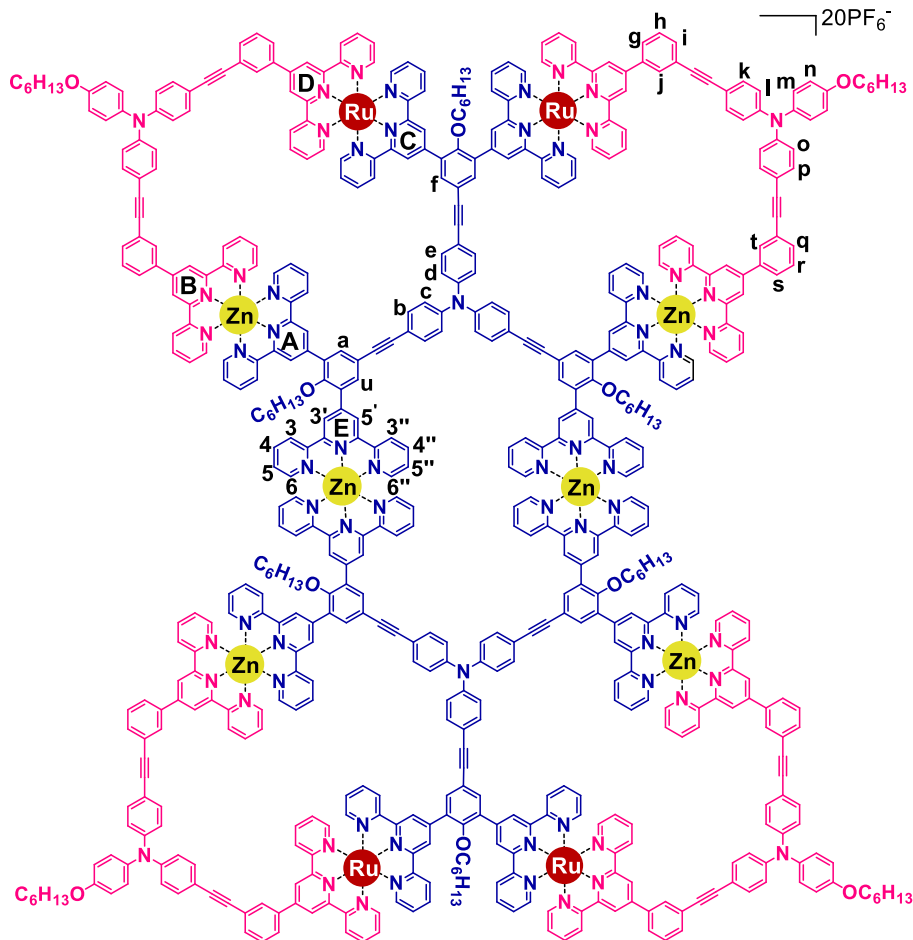

Complex **G3** [**Zn<sub>6</sub>LC<sub>2</sub>**]: To a solution of ligand **LC** (4.2 mg, 0.91  $\mu\text{mol}$ ) in  $\text{CHCl}_3$  (1.0 mL), a solution of  $\text{Zn}(\text{NO}_3)_2 \cdot 6\text{H}_2\text{O}$  (0.82 mg, 2.73  $\mu\text{mol}$ ) in MeOH (3.0 mL) was added slowly. The mixture was heated at 50  $^\circ\text{C}$  for 10 h and then cooled down to room temperature. The mixture was then added to a solution of  $\text{NH}_4\text{PF}_6$  (50 mg in 15 mL MeOH). After a while, precipitate was formed, washed with MeOH for three times by centrifugation, dried in vacuum to give the product as a red solid (4.4 mg, 94 % yield).  $^1\text{H}$  NMR (500 MHz,  $\text{CD}_3\text{CN}$ , 300 K)  $\delta$  9.40 – 9.18 (m, 24H,  $\text{tpy}^{\text{C}}\text{-H}^{3',5'}$ ,  $\text{tpy}^{\text{A}}\text{-H}^{3',5'}$ ,  $\text{tpy}^{\text{E}}\text{-H}^{3',5'}$ ), 9.06 (m, 16H,  $\text{tpy}^{\text{D}}\text{-H}^{3',5'}$ ,  $\text{tpy}^{\text{B}}\text{-H}^{3',5'}$ ), 8.84 – 8.59 (m, 40H,  $\text{tpy}^{\text{C}}\text{-H}^{3,3''}$ ,  $\text{tpy}^{\text{E}}\text{-H}^{3,3''}$ ,  $\text{tpy}^{\text{B}}\text{-H}^{3,3''}$ ,  $\text{tpy}^{\text{A}}\text{-H}^{3,3''}$ ,  $\text{tpy}^{\text{D}}\text{-H}^{3,3''}$ ), 8.40 (m, 8H,  $\text{Ph-H}^{\text{j}}$ ,  $\text{Ph-H}^{\text{t}}$ ), 8.33 (m, 12H,  $\text{Ph-H}^{\text{a}}$ ,  $\text{Ph-H}^{\text{f}}$ ,  $\text{Ph-H}^{\text{u}}$ ), 8.23 (br, 36 H,  $\text{tpy}^{\text{C}}\text{-H}^{4,4''}$ ,  $\text{tpy}^{\text{E}}\text{-H}^{4,4''}$ ,  $\text{tpy}^{\text{B}}\text{-H}^{4,4''}$ ,  $\text{Ph-H}^{\text{g}}$ ,  $\text{Ph-H}^{\text{s}}$ ,  $\text{Ph-H}^{\text{c}}$ ), 7.98 (m, 24H,  $\text{tpy}^{\text{A}}\text{-H}^{4,4''}$ ,  $\text{tpy}^{\text{D}}\text{-H}^{4,4''}$ ,  $\text{Ph-H}^{\text{q}}$ ,  $\text{Ph-H}^{\text{i}}$ ), 7.92 – 7.77 (m, 36H,  $\text{tpy}^{\text{C}}\text{-H}^{6,6''}$ ,  $\text{tpy}^{\text{E}}\text{-H}^{6,6''}$ ,  $\text{tpy}^{\text{B}}\text{-H}^{6,6''}$ ,  $\text{Ph-H}^{\text{h}}$ ,  $\text{Ph-H}^{\text{r}}$ ,  $\text{Ph-H}^{\text{d}}$ ), 7.66 (d,  $J = 7.9$  Hz, 8H,  $\text{Ph-H}^{\text{b}}$ ), 7.58 – 7.38 (m, 56H,  $\text{tpy}^{\text{A}}\text{-H}^{6,6''}$ ,  $\text{tpy}^{\text{D}}\text{-H}^{6,6''}$ ,  $\text{tpy}^{\text{C}}\text{-H}^{5,5''}$ ,  $\text{tpy}^{\text{E}}\text{-H}^{5,5''}$ ,  $\text{tpy}^{\text{B}}\text{-H}^{5,5''}$ ,  $\text{Ph-H}^{\text{k}}$ ,  $\text{Ph-H}^{\text{p}}$ ), 7.31 (m, d,  $J = 7.9$  Hz, 8H,  $\text{Ph-H}^{\text{e}}$ ), 7.23 (m, 16 H,  $\text{tpy}^{\text{A}}\text{-H}^{5,5''}$ ,  $\text{tpy}^{\text{D}}\text{-H}^{5,5''}$ ), 7.17 (d,  $J = 8.7$  Hz, 8H,  $\text{Ph-H}^{\text{m}}$ ), 7.11 (m, 16H,  $\text{Ph-H}^{\text{o}}$ ,  $\text{Ph-H}^{\text{l}}$ ), 6.94 (d,  $J = 8.7$  Hz,

8H, Ph- $H^a$ ), 4.02 (m, 8H), 3.89 (m, 4H), 3.77 (m, 8H), 1.79 (t,  $J = 7.2$  Hz, 8H), 1.57 – 1.14 (m, 66 H), 0.93 (t,  $J = 6.6$  Hz, 16H), 0.71 (m, 8H), 0.32 (m, 12H).  $^{13}\text{C}$  NMR (125 MHz,  $\text{CD}_3\text{CN}$ , 300 K)  $\delta$  159.14, 156.42, 156.15, 153.53, 150.86, 150.50, 139.14, 138.23, 137.66, 133.94, 133.59, 131.01, 129.41, 128.52, 125.37, 123.22, 122.69, 121.72, 118.26, 116.77, 100.91, 88.69, 69.18, 41.15, 32.25, 31.07, 30.82, 29.88, 26.90, 26.36, 23.28, 23.08, 23.01, 14.27, 13.89. ESI-TOF ( $m/z$ ): 1379.6 [ $\text{M}-8\text{PF}_6^-$ ] $^{8+}$  (calcd  $m/z$ : 1379.6), 1210.1 [ $\text{M}-9\text{PF}_6^-$ ] $^{9+}$  (calcd  $m/z$ : 1210.1), 1074.6 [ $\text{M}-10\text{PF}_6^-$ ] $^{10+}$  (calcd  $m/z$ : 1074.6), 963.8 [ $\text{M}-11\text{PF}_6^-$ ] $^{11+}$  (calcd  $m/z$ : 963.8), 871.4 [ $\text{M}-12\text{PF}_6^-$ ] $^{12+}$  (calcd  $m/z$ : 871.4), 793.2 [ $\text{M}-13\text{PF}_6^-$ ] $^{13+}$  (calcd  $m/z$ : 793.2), 726.2 [ $\text{M}-14\text{PF}_6^-$ ] $^{14+}$  (calcd  $m/z$ : 726.2), 668.1 [ $\text{M}-15\text{PF}_6^-$ ] $^{15+}$  (calcd  $m/z$ : 668.1).

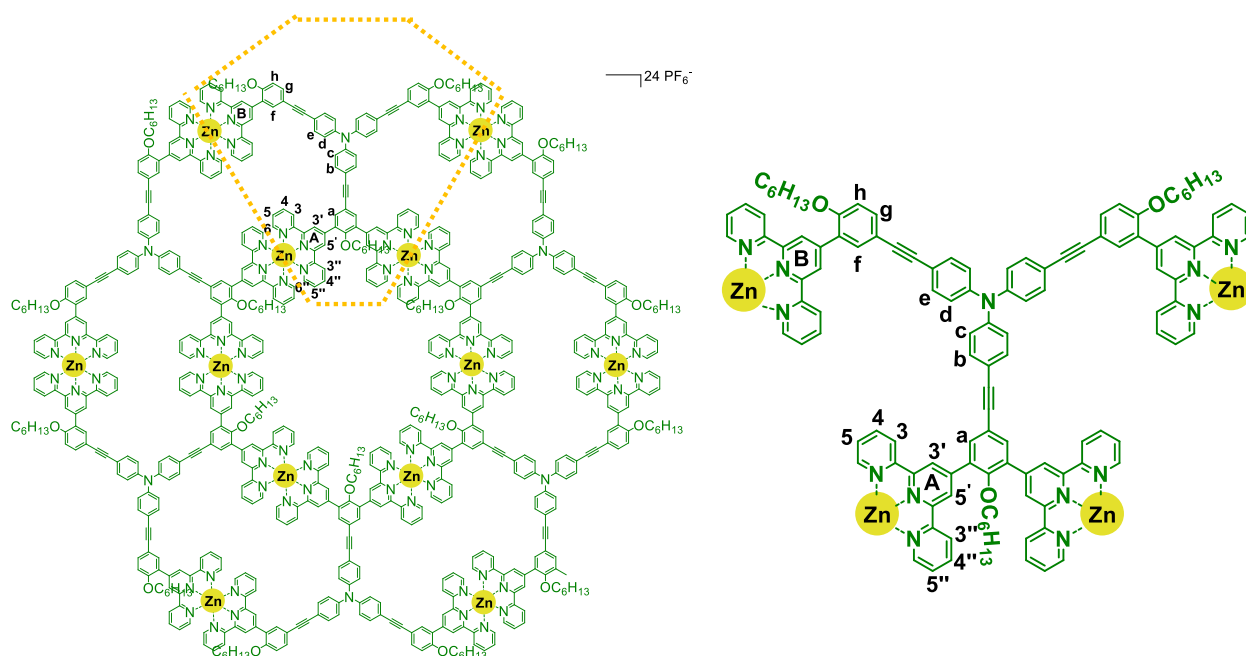

**Complex  $\text{G4} [\text{Zn}_6\text{LD}_6]$ :** To a solution of ligand **LD** (5.2 mg, 2.9  $\mu\text{mol}$ ) in  $\text{CHCl}_3$  (1.0 mL), a solution of  $\text{Zn}(\text{NO}_3)_2 \cdot 6\text{H}_2\text{O}$  (1.73 mg, 5.8  $\mu\text{mol}$ ) in MeOH (3.0 mL) was added dropwise. The mixture was heated at 50  $^\circ\text{C}$  for 8 h and then added to a solution of  $\text{NH}_4\text{PF}_6$  (70 mg in 20 mL MeOH). After a while, a precipitate was formed, washed with MeOH for three times by centrifugation, dried in vacuum to give the product as a yellow solid (6.9 mg, 96 % yield).  $^1\text{H}$  NMR (500 MHz,  $\text{CD}_3\text{CN}$ , 300 K)  $\delta$  9.27 (s, 24H,  $\text{tpy}^{\text{A}}\text{-H}^{3',5'}$ ), 9.07 (s, 24H,  $\text{tpy}^{\text{B}}\text{-H}^{3',5'}$ ), 8.81 (d,  $J = 8.1$  Hz, 24H,  $\text{tpy}^{\text{A}}\text{-H}^{3,3''}$ ), 8.66 (d,  $J = 8.5$  Hz, 24H,  $\text{tpy}^{\text{B}}\text{-H}^{3,3''}$ ), 8.36 (s, 12H, Ph- $H^a$ ), 8.23 (m, 48H,  $\text{tpy}^{\text{A}}\text{-H}^{4,4''}$ ,  $\text{tpy}^{\text{B}}\text{-H}^{4,4''}$ ), 8.08 (s, 12H, Ph- $H^f$ ), 7.99-7.81 (m, 60H,  $\text{tpy}^{\text{A}}\text{-H}^{6,6''}$ ,  $\text{tpy}^{\text{B}}\text{-H}^{6,6''}$ , Ph- $H^b$ ),

7.71 – 7.56 (m, 36H, Ph- $H^g$ , Ph- $H^e$ ), 7.46 (m, 48H, tpy<sup>A</sup>- $H^{5,5''}$ , tpy<sup>B</sup>- $H^{5,5''}$ ), 7.38 (d,  $J = 8.8$  Hz, 12H, Ph- $H^c$ ), 7.25 (m, 36H, Ph- $H^d$ , Ph- $H^h$ ), 4.54 – 4.07 (m, 24H), 3.90 – 3.40 (m, 12H), 1.93 – 1.87 (m, 24H), 1.51 (m, 24H), 1.26 (m, 48H), 1.14 – 1.01 (m, 24H), 0.95 – 0.80 (m, 12H), 0.61 (m, 36H), 0.36 (m, 18H), 0.24 (t,  $J = 7.5$  Hz, 12H). <sup>13</sup>C NMR (125 MHz, CD<sub>3</sub>CN, 300 K)  $\delta$  155.82, 152.97, 148.71, 148.28, 147.14, 147.00, 140.52, 132.08, 131.88, 128.32, 126.65, 126.09, 125.04, 123.57, 123.41, 122.20, 115.07, 112.49, 87.74, 87.31, 68.23, 66.06, 30.48, 30.36, 29.37, 28.13, 25.20, 24.95, 21.36, 21.11, 12.30, 12.01. ESI-TOF ( $m/z$ ): 1379.6 [M-8PF<sub>6</sub><sup>-</sup>]<sup>8+</sup> (calcd  $m/z$ : 1379.6), 1210.1 [M-9PF<sub>6</sub><sup>-</sup>]<sup>9+</sup> (calcd  $m/z$ : 1210.1), 1074.6 [M-10PF<sub>6</sub><sup>-</sup>]<sup>10+</sup> (calcd  $m/z$ : 1074.6), 963.8 [M-11PF<sub>6</sub><sup>-</sup>]<sup>11+</sup> (calcd  $m/z$ : 963.8), 871.4 [M-12PF<sub>6</sub><sup>-</sup>]<sup>12+</sup> (calcd  $m/z$ : 871.4), 793.2 [M-13PF<sub>6</sub><sup>-</sup>]<sup>13+</sup> (calcd  $m/z$ : 793.2), 726.2 [M-14PF<sub>6</sub><sup>-</sup>]<sup>14+</sup> (calcd  $m/z$ : 726.2), 668.1 [M-15PF<sub>6</sub><sup>-</sup>]<sup>15+</sup> (calcd  $m/z$ : 668.1).

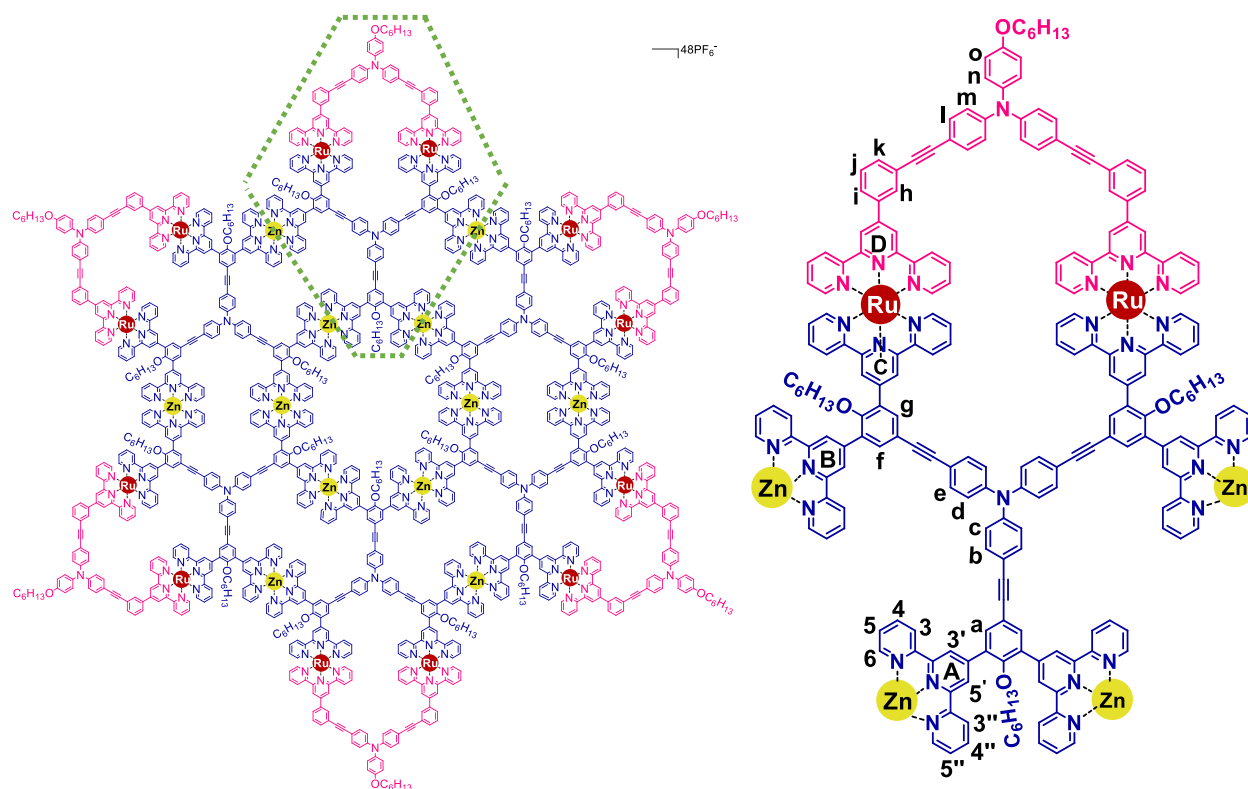

**Complex G5 [Zn<sub>6</sub>LE<sub>6</sub>]:** To a solution of ligand **LE** (7.1 mg, 2.0  $\mu$ mol) in CHCl<sub>3</sub> (1.5 mL), a solution of Zn(NO<sub>3</sub>)<sub>2</sub>•6H<sub>2</sub>O (1.18 mg, 4.0  $\mu$ mol) in MeOH (4.5 mL) was added dropwise. The mixture was heated at 50 °C for 10 h and then added to a solution of NH<sub>4</sub>PF<sub>6</sub> (80 mg in 20 mL MeOH). After a while, a precipitate was formed, washed with MeOH for three times by centrifugation, dried in vacuum to give the product as a red solid (9.0 mg, 96 % yield). <sup>1</sup>H NMR

(500 MHz, CD<sub>3</sub>CN, 300 K)  $\delta$  9.32-9.27 (m, 72H, tpy<sup>C</sup>-H<sup>3',5'</sup>, tpy<sup>A</sup>-H<sup>3',5'</sup>, tpy<sup>B</sup>-H<sup>3',5'</sup>), 9.13 (s, 24H, tpy<sup>D</sup>-H<sup>3',5'</sup>), 8.92 – 8.65 (m, 108H, tpy<sup>A</sup>-H<sup>3,3''</sup>, tpy<sup>C</sup>-H<sup>3,3''</sup>, tpy<sup>B</sup>-H<sup>3,3''</sup>, tpy<sup>D</sup>-H<sup>3,3''</sup>, Ph-H<sup>h</sup>), 8.41 (m, 48H, Ph-H<sup>a</sup>, Ph-H<sup>f</sup>, Ph-H<sup>g</sup>, Ph-H<sup>i</sup>), 8.35-8.27 (m, 72H, tpy<sup>A</sup>-H<sup>4,4''</sup>, tpy<sup>C</sup>-H<sup>4,4''</sup>, Ph-H<sup>j</sup>, Ph-H<sup>b</sup>), 8.07 – 7.95 (m, 108H, tpy<sup>A</sup>-H<sup>6,6''</sup>, tpy<sup>C</sup>-H<sup>6,6''</sup>, tpy<sup>B</sup>-H<sup>4,4''</sup>, tpy<sup>D</sup>-H<sup>4,4''</sup>, Ph-H<sup>k</sup>), 7.83 (d,  $J = 8.9$  Hz, 12H, Ph-H<sup>c</sup>), 7.73 (d,  $J = 8.9$  Hz, 24H, Ph-H<sup>e</sup>), 7.53-7.48 (m, 120H, tpy<sup>B</sup>-H<sup>6,6''</sup>, tpy<sup>D</sup>-H<sup>6,6''</sup>, tpy<sup>C</sup>-H<sup>5,5''</sup>, tpy<sup>A</sup>-H<sup>5,5''</sup>, Ph-H<sup>l</sup>), 7.36 (d,  $J = 8.9$  Hz, 24H, Ph-H<sup>d</sup>), 7.31 – 7.19 (m, 60H, tpy<sup>B</sup>-H<sup>5,5''</sup>, tpy<sup>D</sup>-H<sup>5,5''</sup>, Ph-H<sup>n</sup>), 7.15 (d,  $J = 8.1$  Hz, 24H, Ph-H<sup>m</sup>), 7.04 (d,  $J = 8.3$  Hz, 12H, Ph-H<sup>o</sup>), 4.06 (t,  $J = 6.7$  Hz, 12H), 3.80 (m, 36H), 1.64 – 1.18 (m, 84H), 1.06 – 0.83 (m, 48H), 0.68 (m, 60H), 0.30 (m, 72H). <sup>13</sup>C NMR (125MHz, CD<sub>3</sub>CN, 300 K)  $\delta$  159.06, 156.45, 156.21, 153.60, 153.31, 150.52, 148.85, 142.50, 139.18, 138.37, 133.99, 133.61, 129.46, 128.60, 125.72, 125.39, 125.18, 123.21, 116.81, 100.94, 91.41, 69.21, 49.85, 32.29, 32.24, 31.18, 29.92, 27.05, 26.40, 23.31, 23.04, 22.94, 14.30, 13.90, 13.85. ESI-TOF ( $m/z$ ): 1526.0 [M-17PF<sub>6</sub><sup>-</sup>]<sup>17+</sup> (calcd  $m/z$ : 1526.0), 1433.2 [M-18PF<sub>6</sub><sup>-</sup>]<sup>18+</sup> (calcd  $m/z$ : 1433.2), 1350.1 [M-19PF<sub>6</sub><sup>-</sup>]<sup>19+</sup> (calcd  $m/z$ : 1350.1), 1275.4 [M-20PF<sub>6</sub><sup>-</sup>]<sup>20+</sup> (calcd  $m/z$ : 1275.4), 1207.7 [M-21PF<sub>6</sub><sup>-</sup>]<sup>21+</sup> (calcd  $m/z$ : 1207.7), 1146.2 [M-22PF<sub>6</sub><sup>-</sup>]<sup>22+</sup> (calcd  $m/z$ : 1146.2).



## 5. ESI-MS spectra data of ligand LA-LE and complexes G1-G5.

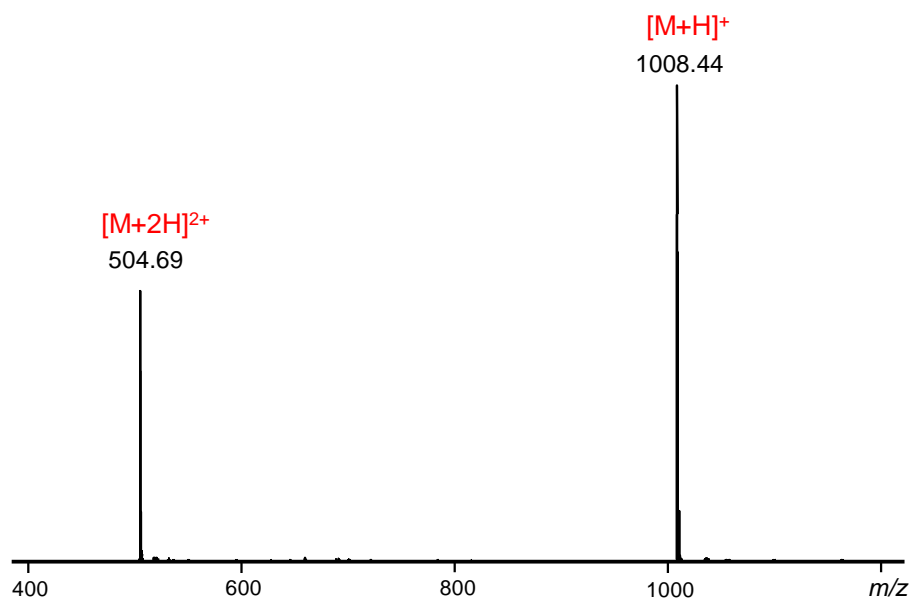

Figure S3. ESI-MS spectrum of LA.

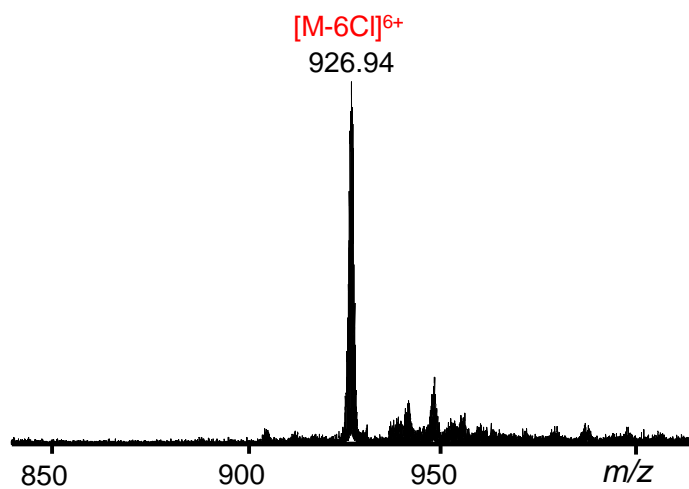

Figure S4. ESI-MS spectrum of LB.

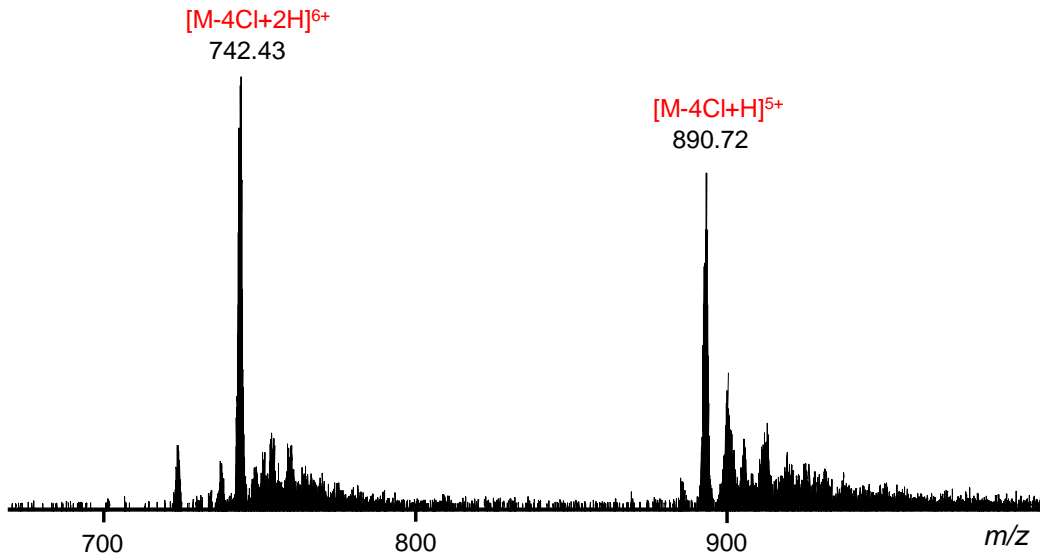

**Figure S5.** ESI-MS spectrum of LC.

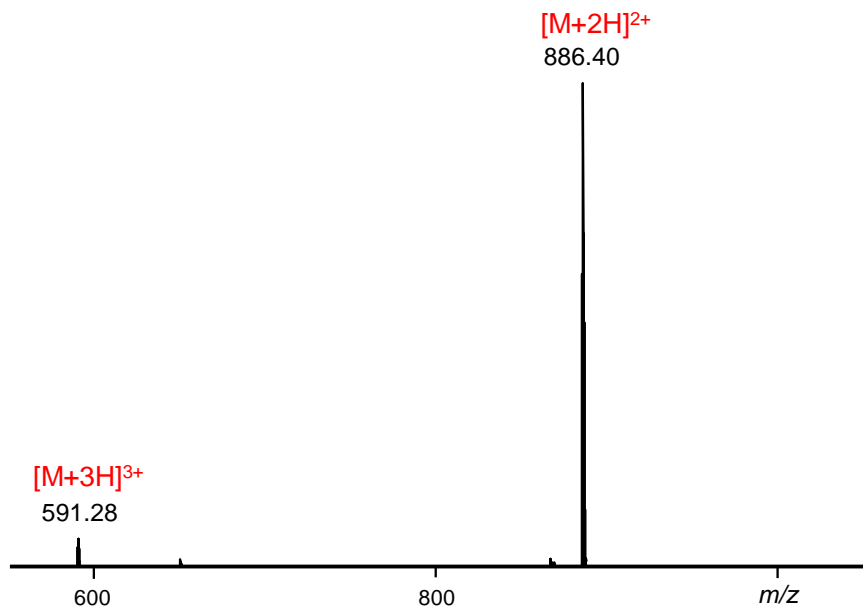

**Figure S6.** ESI-MS spectrum of LD.

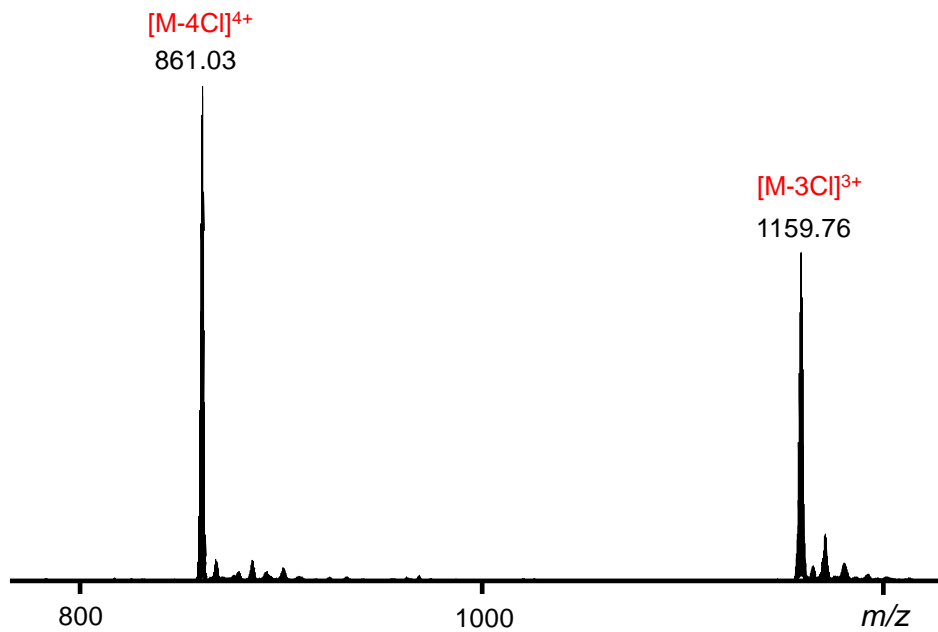

**Figure S7.** ESI-MS spectrum of LE.

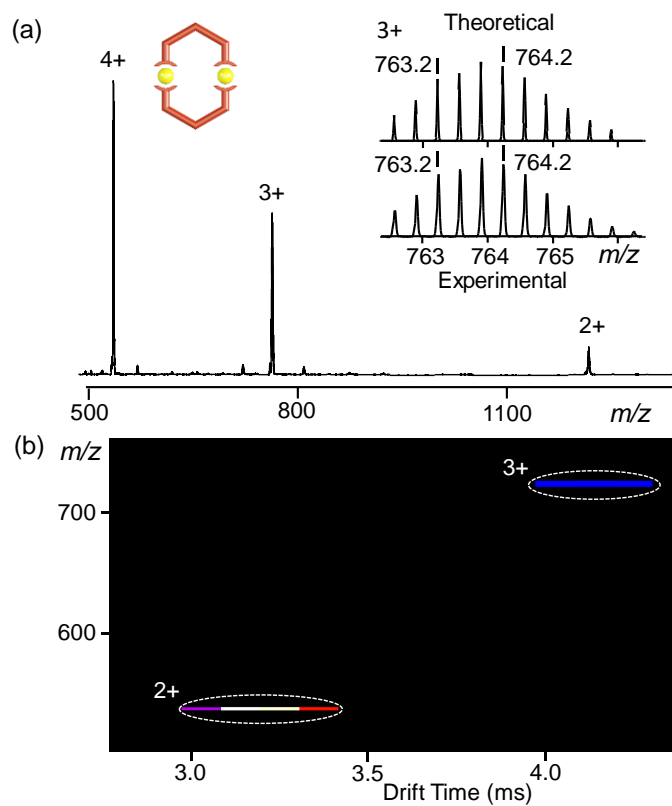

**Figure S8.** (a) ESI-MS and (b) TWIM-MS plot ( $m/z$  vs. drift time) of complex G1  $[LA_2Zn_2]$ .

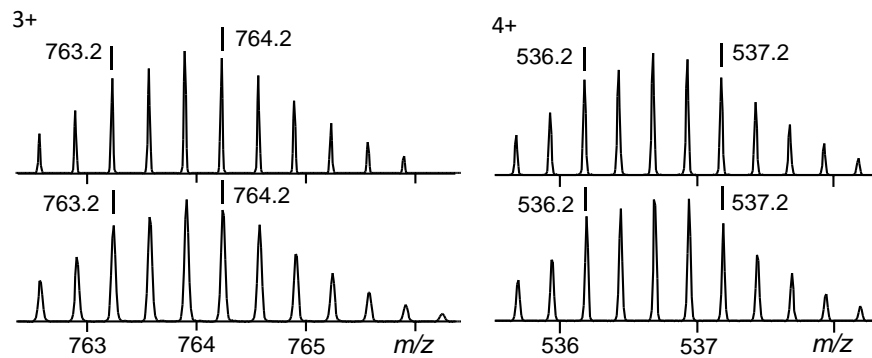

**Figure S9.** Calculated (top) and Measured (bottom) isotope patterns for different charge states observed from **G1** ( $\text{PF}_6^-$  as counterion).

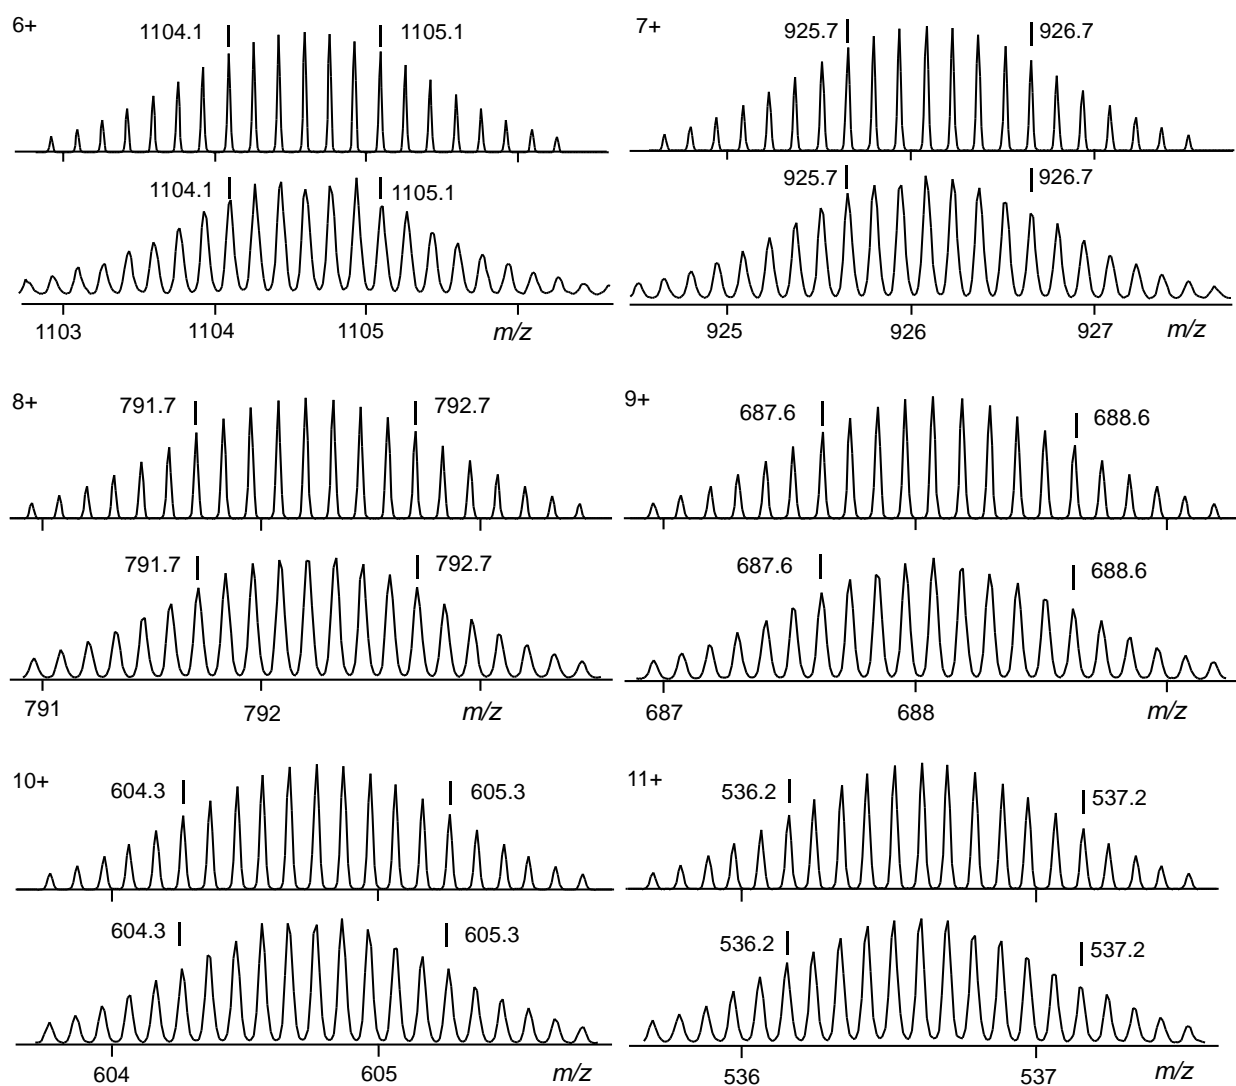

**Figure S10.** Calculated (top) and Measured (bottom) isotope patterns for different charge states observed from **G2[LBZn<sub>3</sub>]** ( $\text{PF}_6^-$  as counterion).

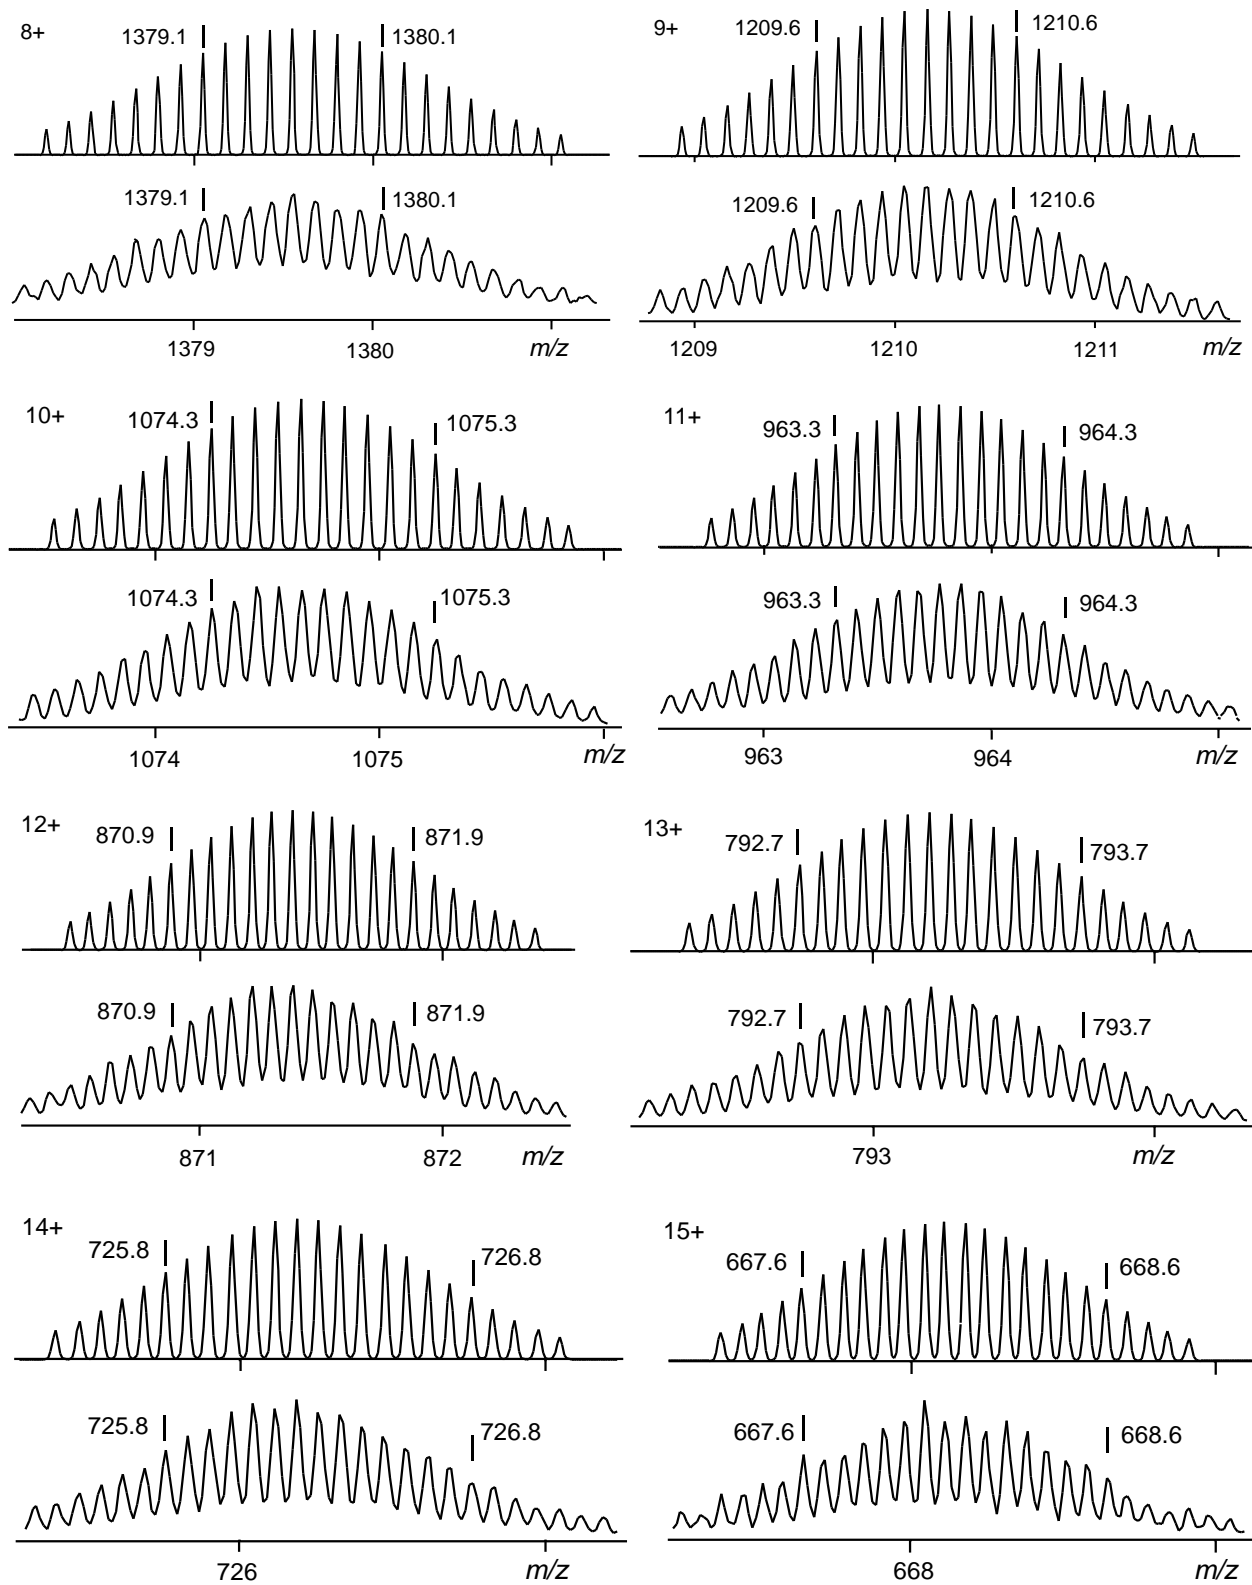

**Figure S11.** Calculated (top) and Measured (bottom) isotope patterns for different charge states observed from  $G3 [LC_2Zn_6]$ . ( $PF_6^-$  as counterion).

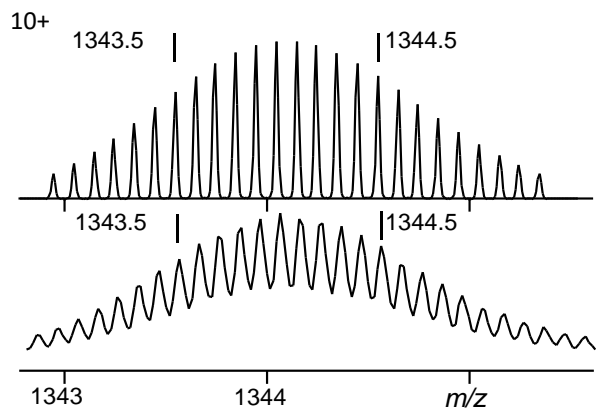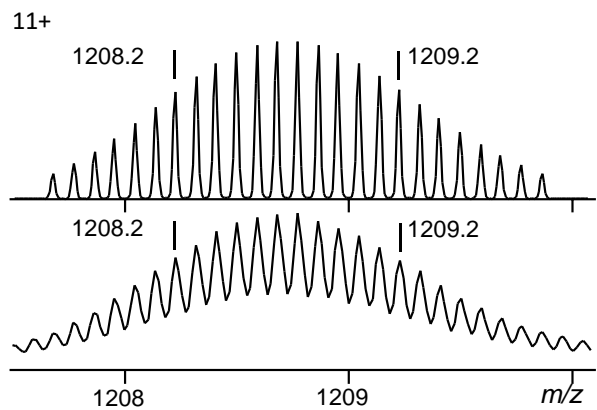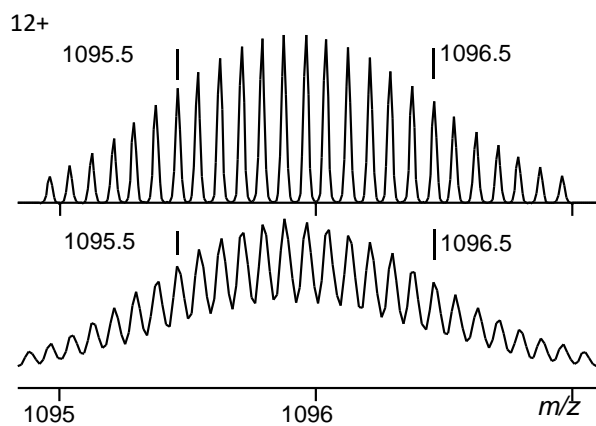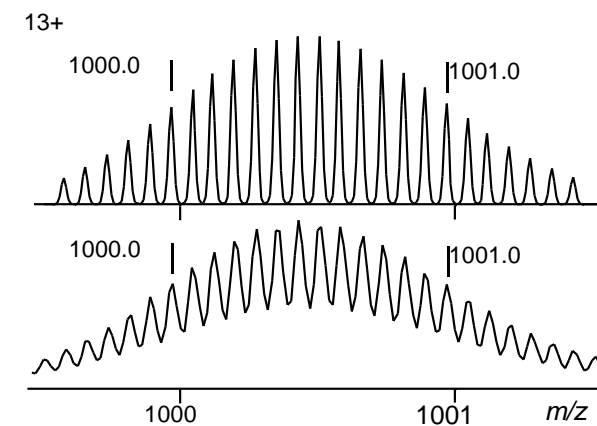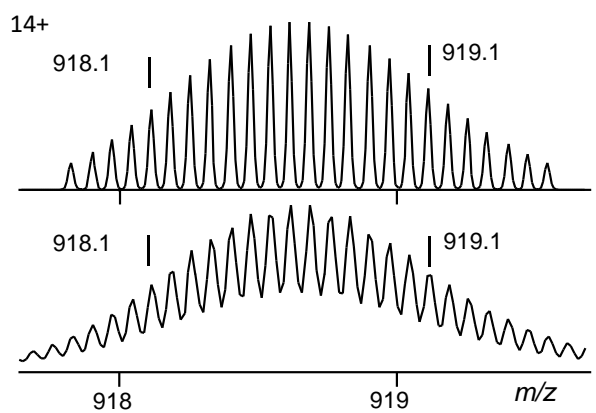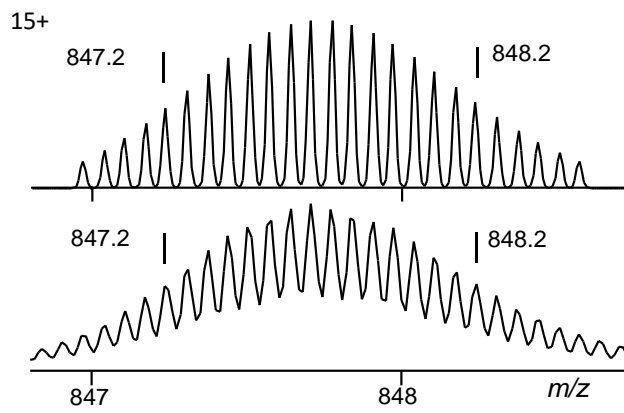

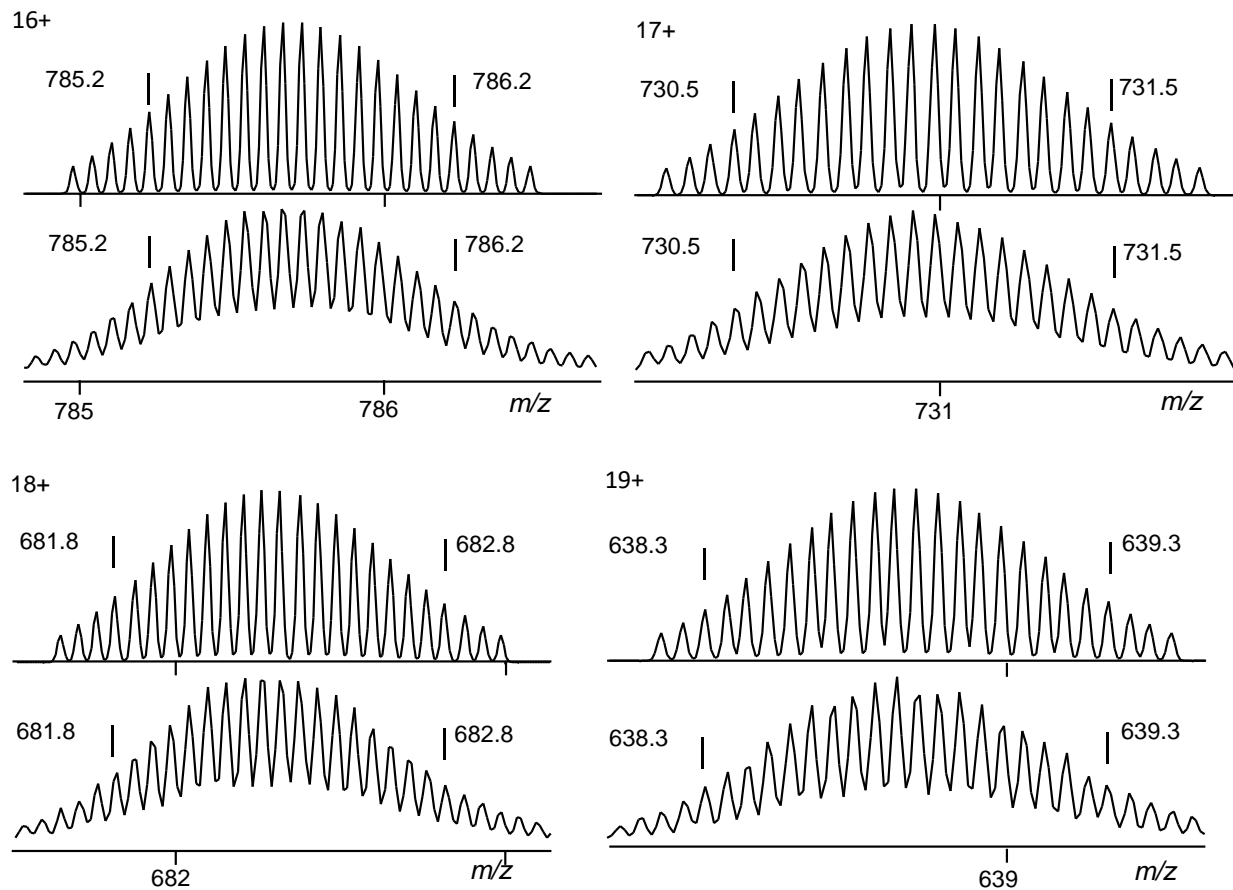

**Figure S12.** Calculated (top) and Measured (bottom) isotope patterns for different charge states observed from **G4 [LD<sub>6</sub>Zn<sub>12</sub>]**. ( $\text{PF}_6^-$  as counterion).

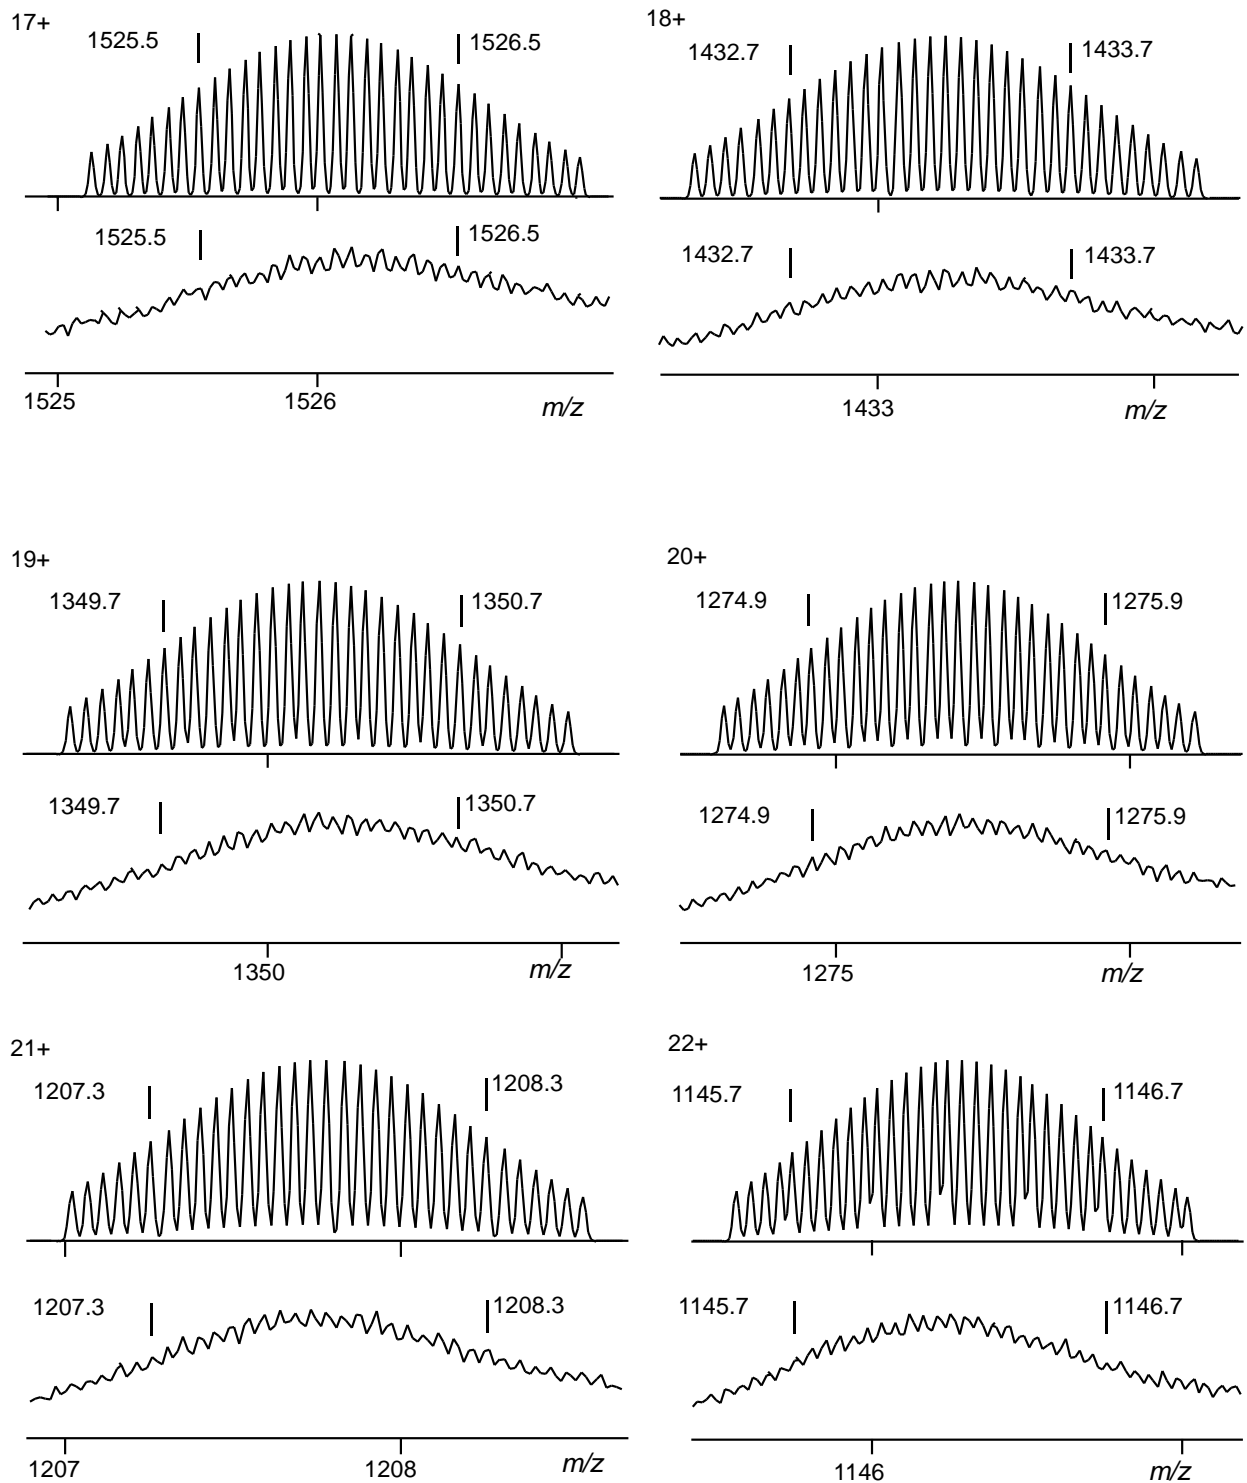

**Figure S13.** Calculated (top) and Measured (bottom) isotope patterns for different charge states observed from **G5** [**LE<sub>6</sub>Zn<sub>12</sub>**]. ( $\text{PF}_6^-$  as counterion).



6.  $^1\text{H}$  NMR,  $^{13}\text{C}$  NMR, 2D COSY NMR, 2D NOESY NMR spectra

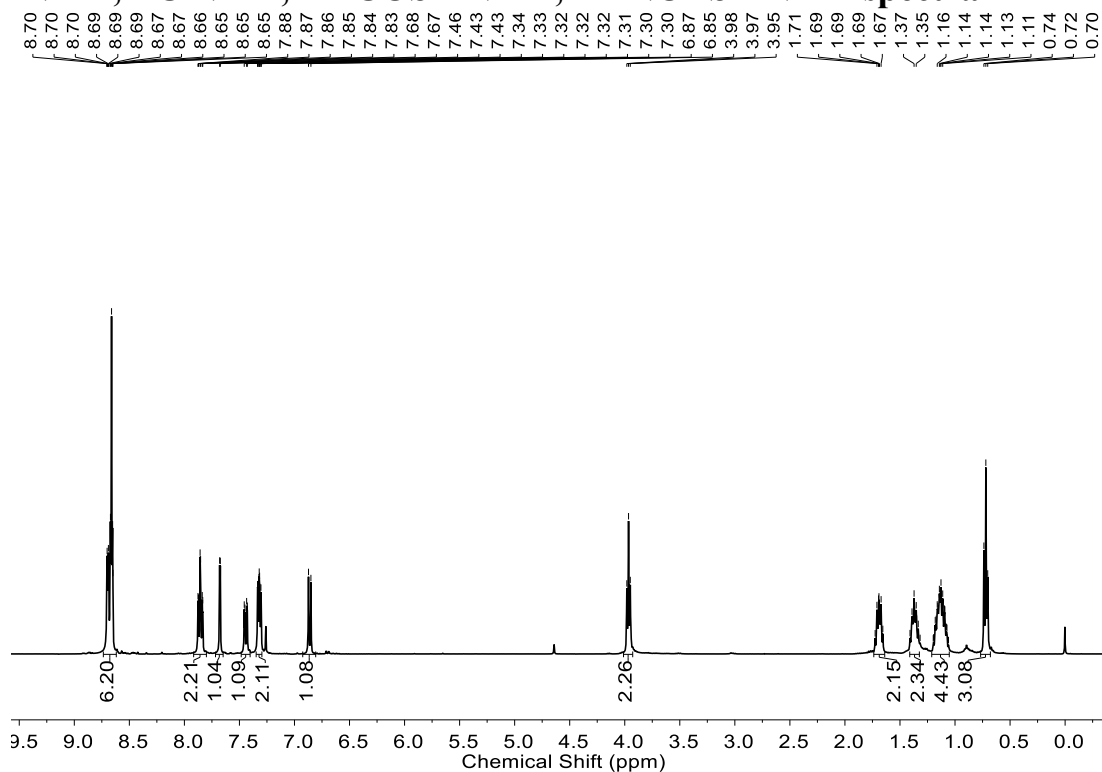

Figure S14.  $^1\text{H}$  NMR (400 MHz,  $\text{CDCl}_3$ ) spectrum of S-4.

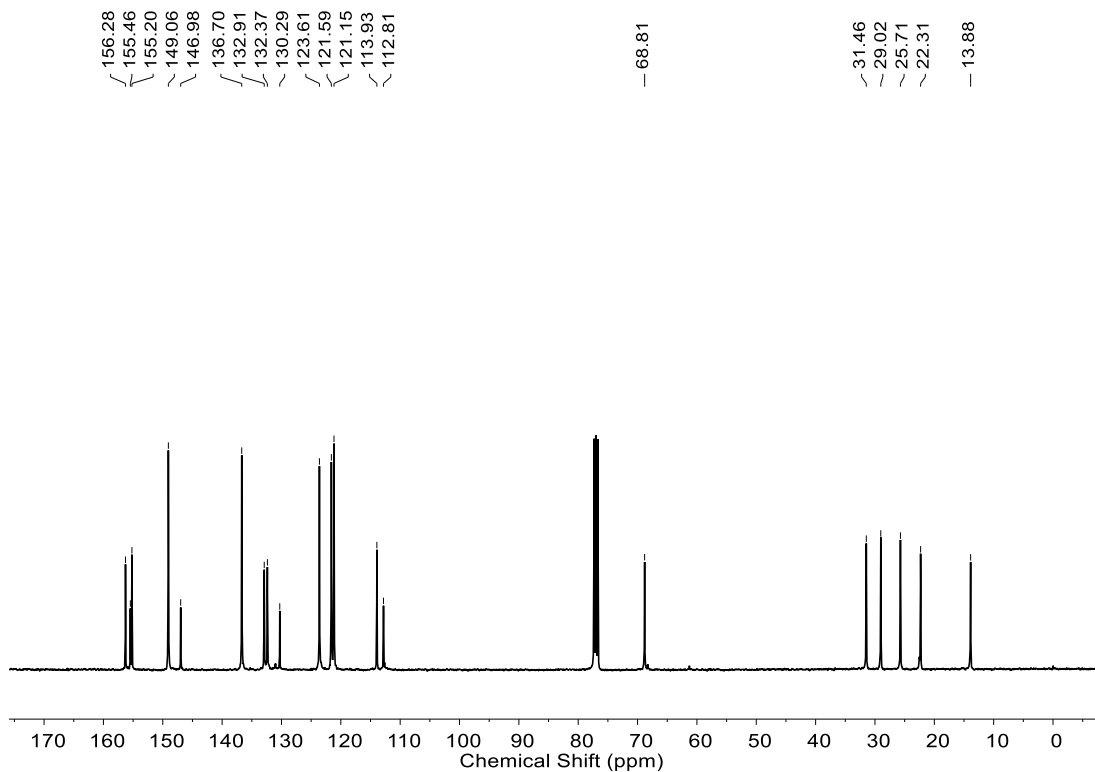

Figure S15.  $^{13}\text{C}$  NMR (100 MHz,  $\text{CDCl}_3$ ) spectrum of ligand S-4.

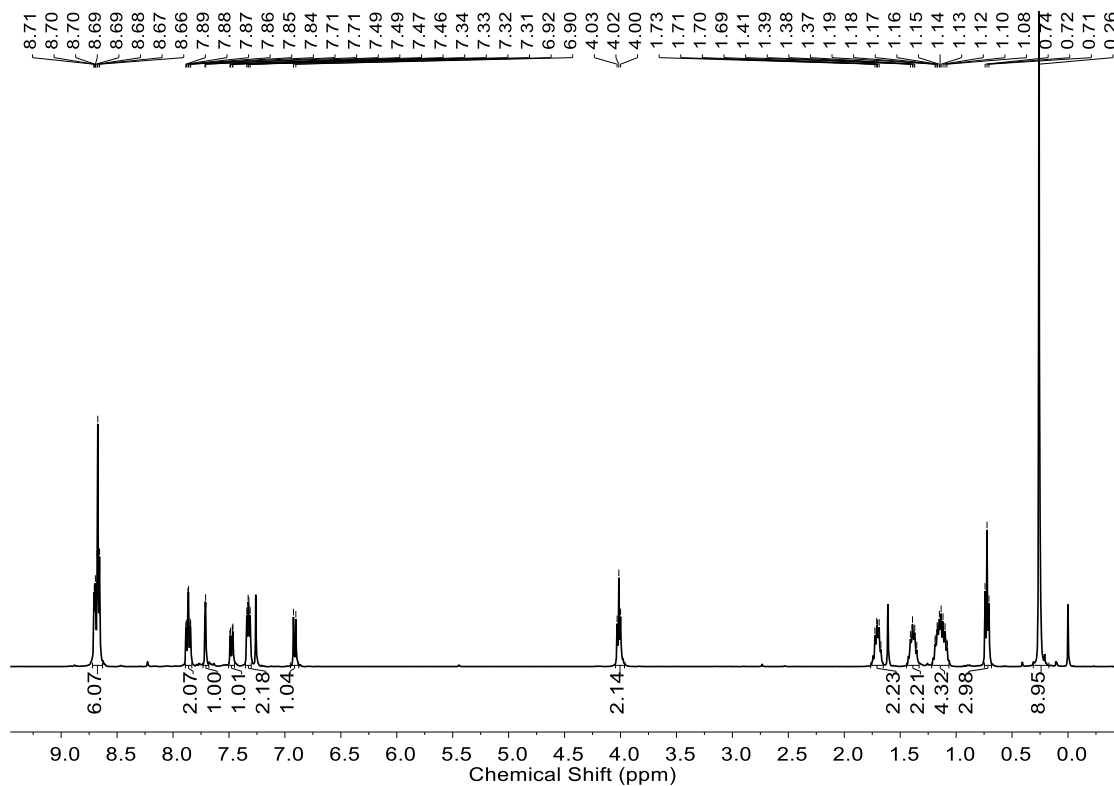

**Figure S16.**  $^1\text{H}$  NMR (400 MHz,  $\text{CDCl}_3$ ) spectrum of **S-5**.

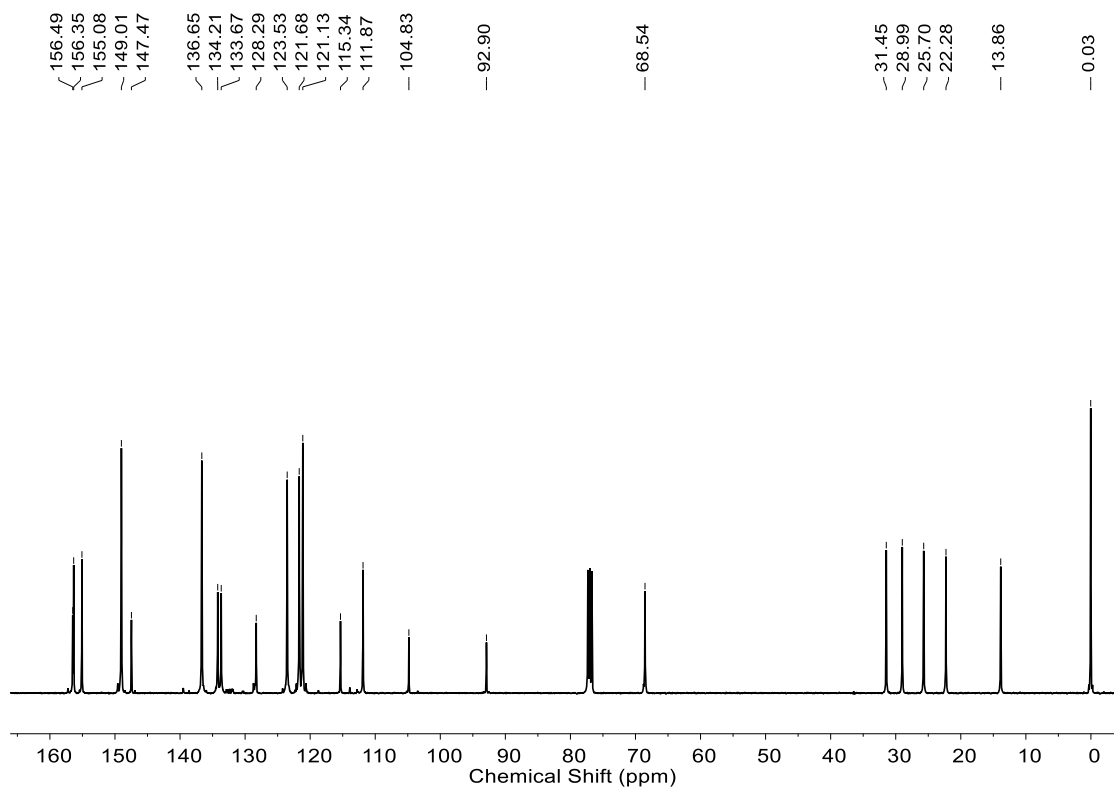

**Figure S17.**  $^{13}\text{C}$  NMR (100 MHz,  $\text{CDCl}_3$ ) spectrum of ligand **S-5**.

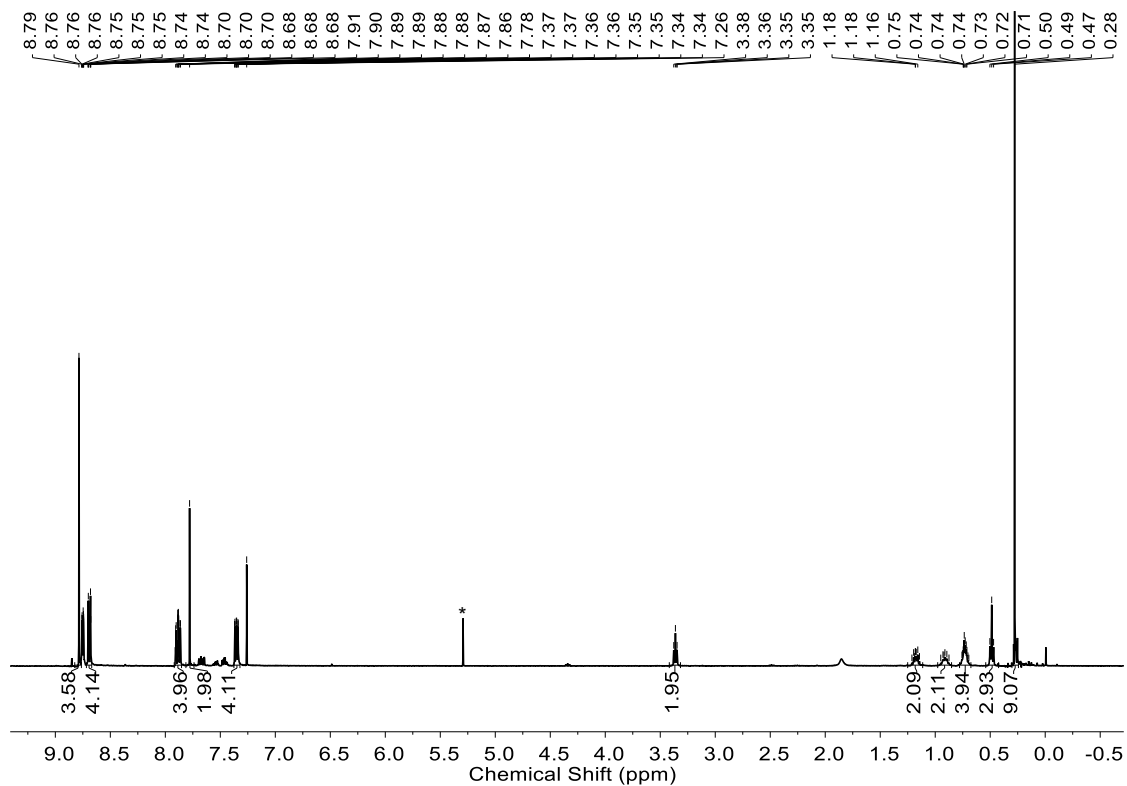

**Figure S18.**  $^1\text{H}$  NMR (400 MHz,  $\text{CDCl}_3$ ) spectrum of **S-8** (asterisk represent  $\text{CH}_2\text{Cl}_2$ ).

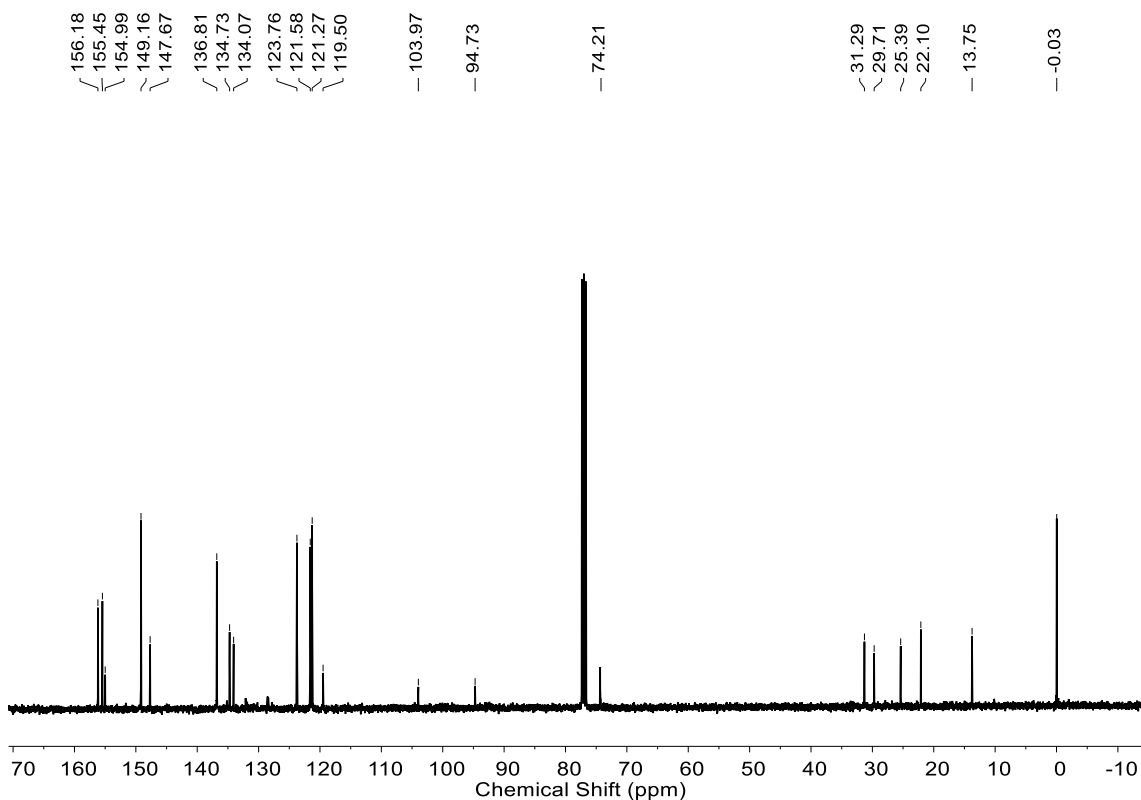

**Figure S19.**  $^{13}\text{C}$  NMR (100 MHz,  $\text{CDCl}_3$ ) spectrum of ligand **S-8**.

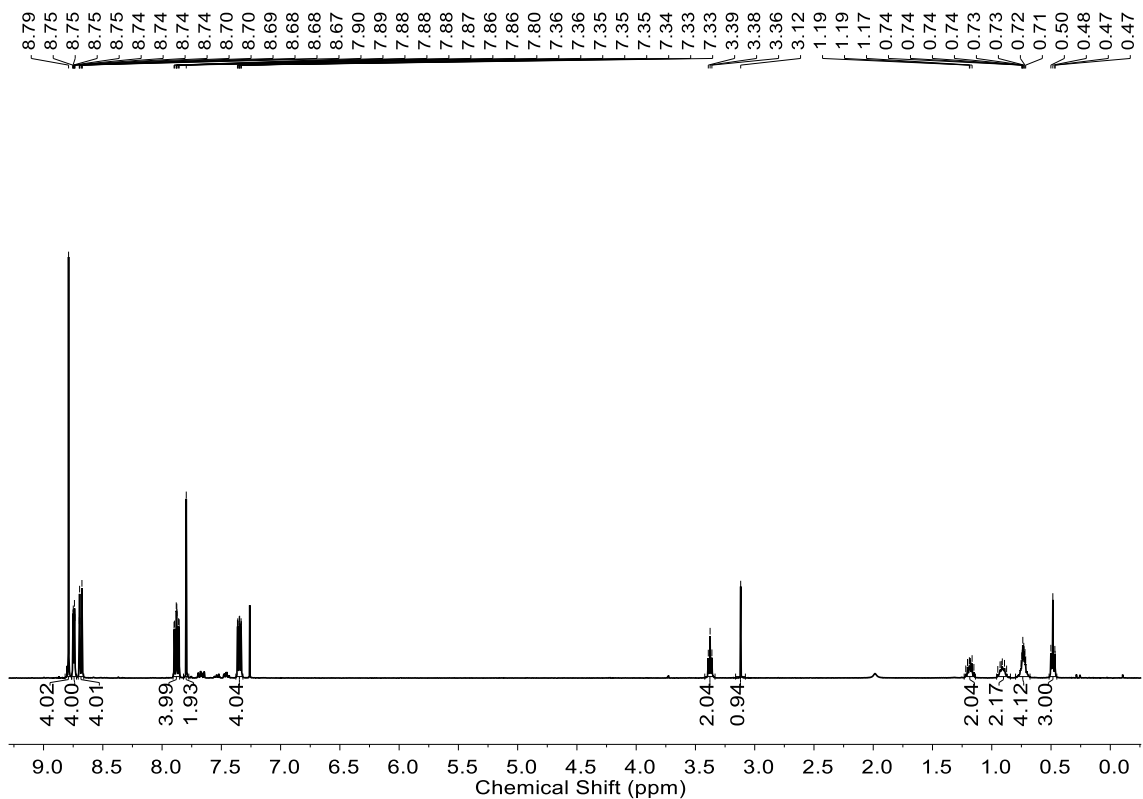

**Figure S20.**  $^1\text{H}$  NMR (400 MHz,  $\text{CDCl}_3$ ) spectrum of **S-9**.

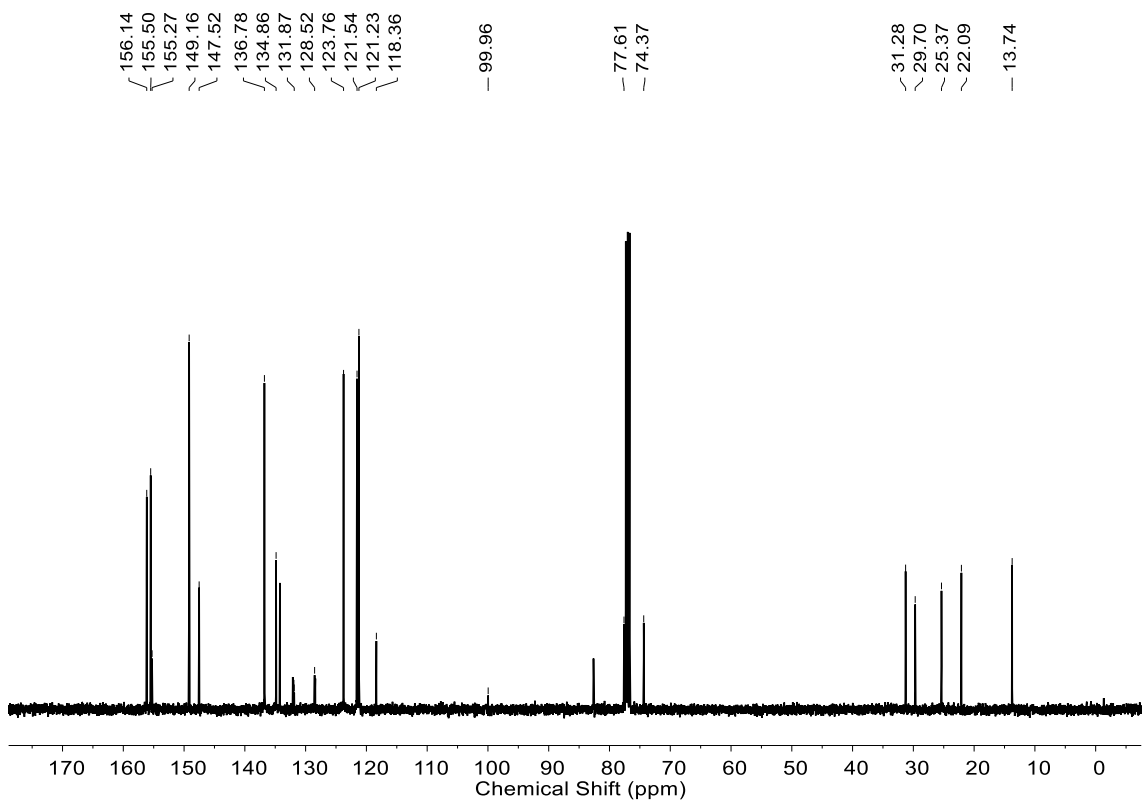

**Figure S21.**  $^{13}\text{C}$  NMR (100 MHz,  $\text{CDCl}_3$ ) spectrum of ligand **S-9**.

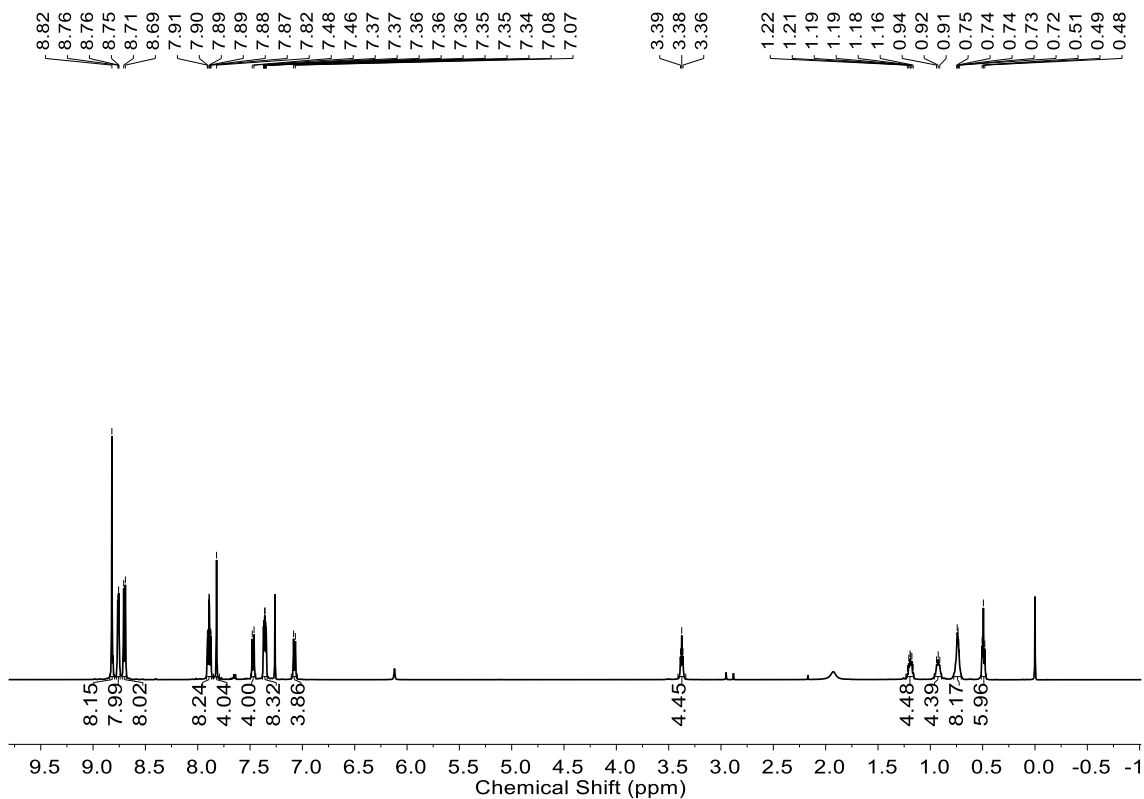

**Figure S22.**  $^1\text{H}$  NMR (500 MHz,  $\text{CDCl}_3$ ) spectrum of **S-12**.

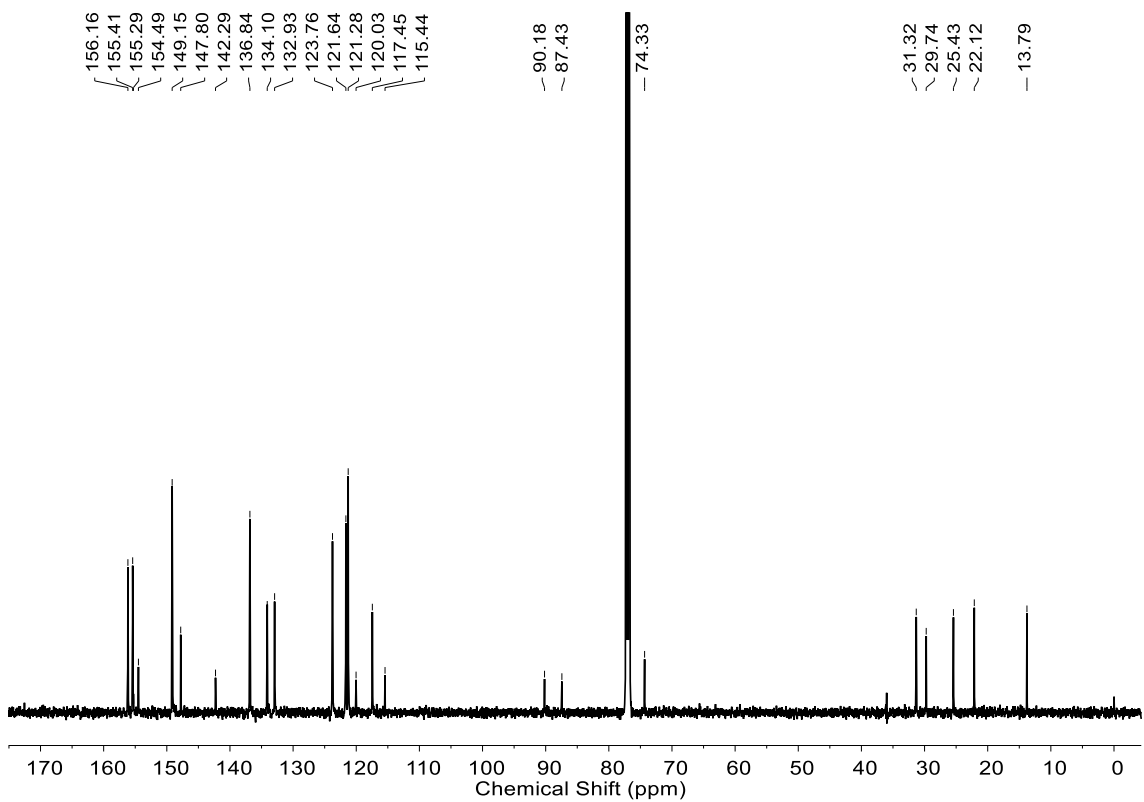

**Figure S23.**  $^{13}\text{C}$  NMR (125 MHz,  $\text{CDCl}_3$ ) spectrum of **S-12**.

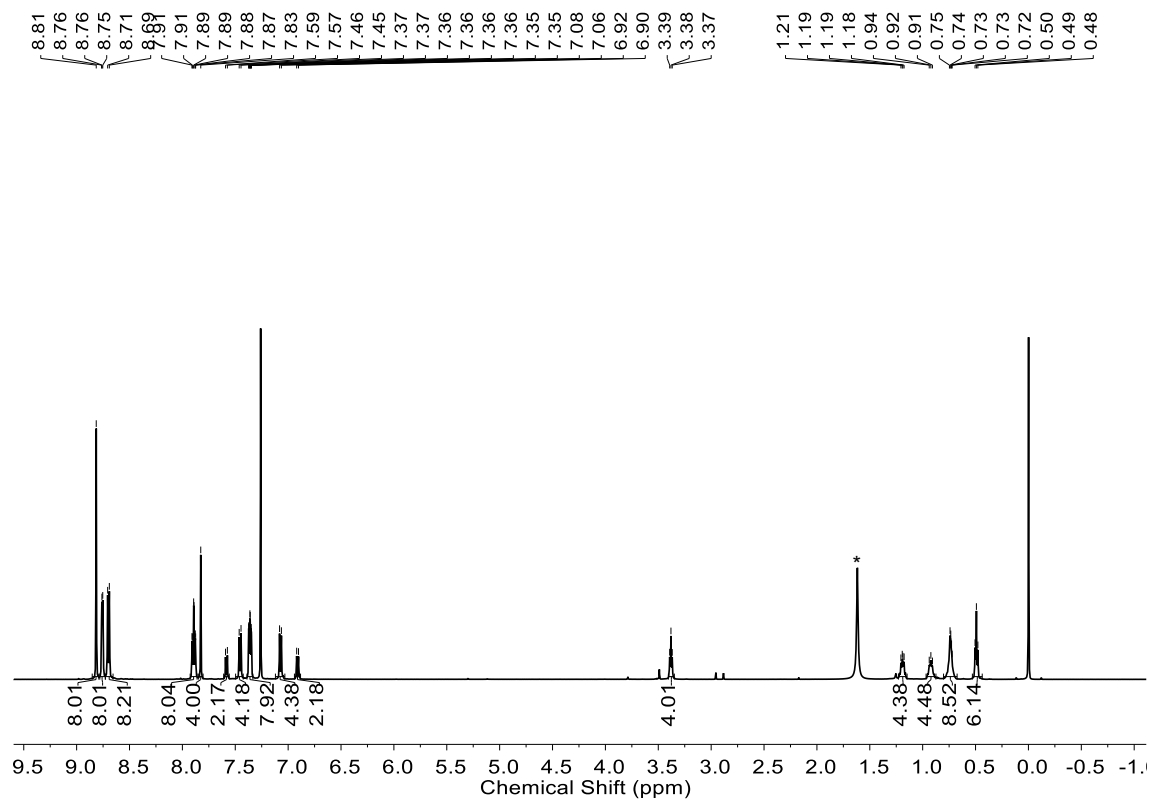

**Figure S24.**  $^1\text{H}$  NMR (500 MHz,  $\text{CDCl}_3$ ) spectrum of **S-13** (asterisk represent  $\text{H}_2\text{O}$ ).

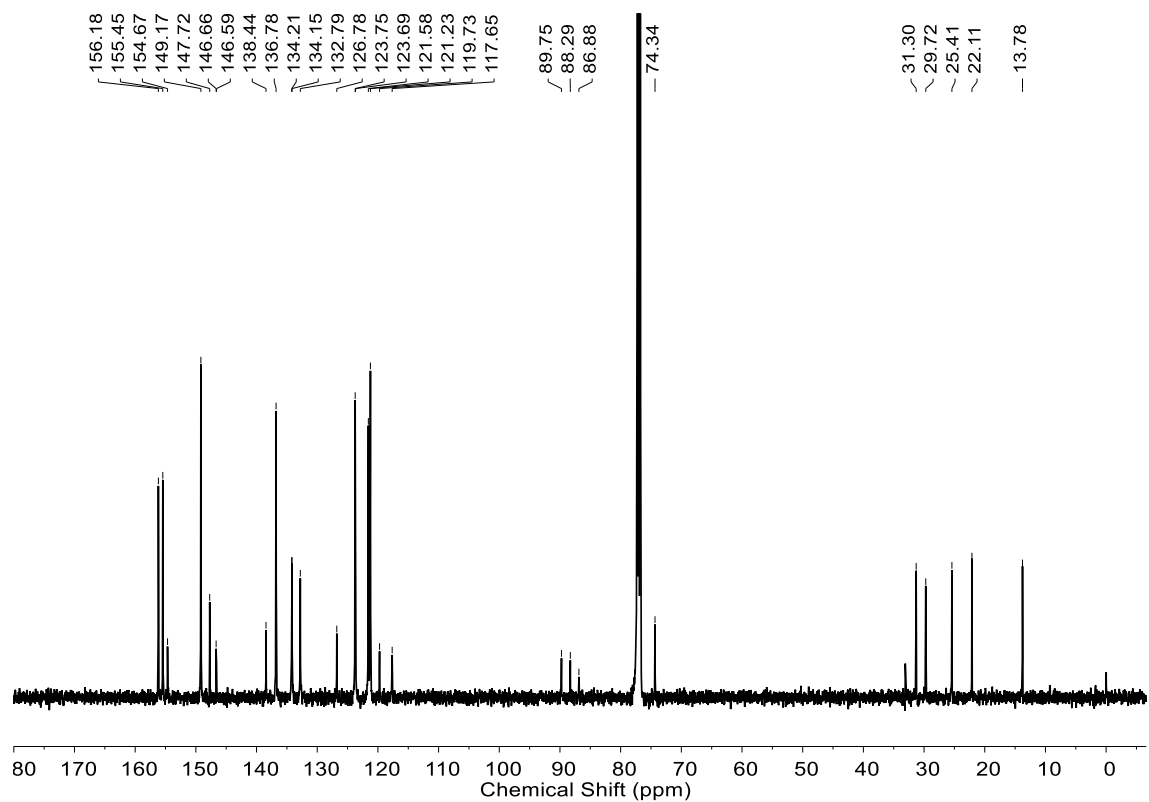

**Figure S25.**  $^{13}\text{C}$  NMR (125 MHz,  $\text{CDCl}_3$ ) spectrum of **S-13**.

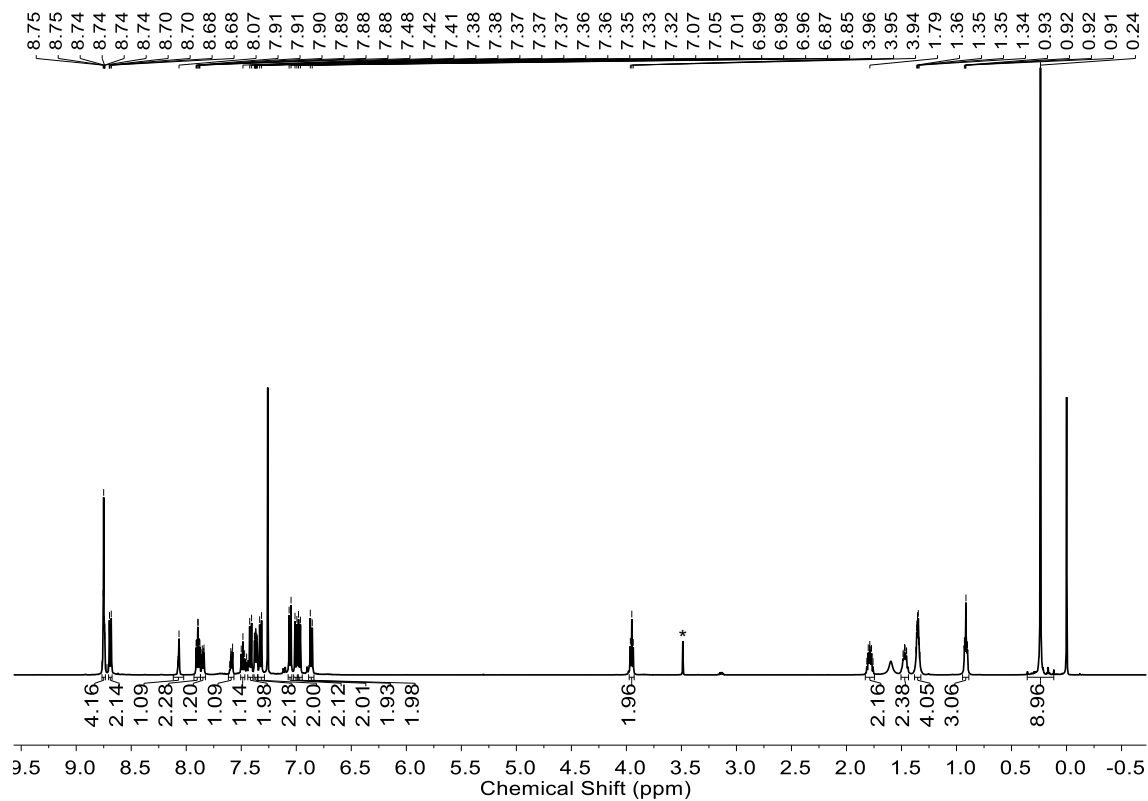

Figure S26.  $^1\text{H}$  NMR (500 MHz,  $\text{CDCl}_3$ ) spectrum of **S-14** (asterisk represent  $\text{CH}_3\text{OH}$ ).

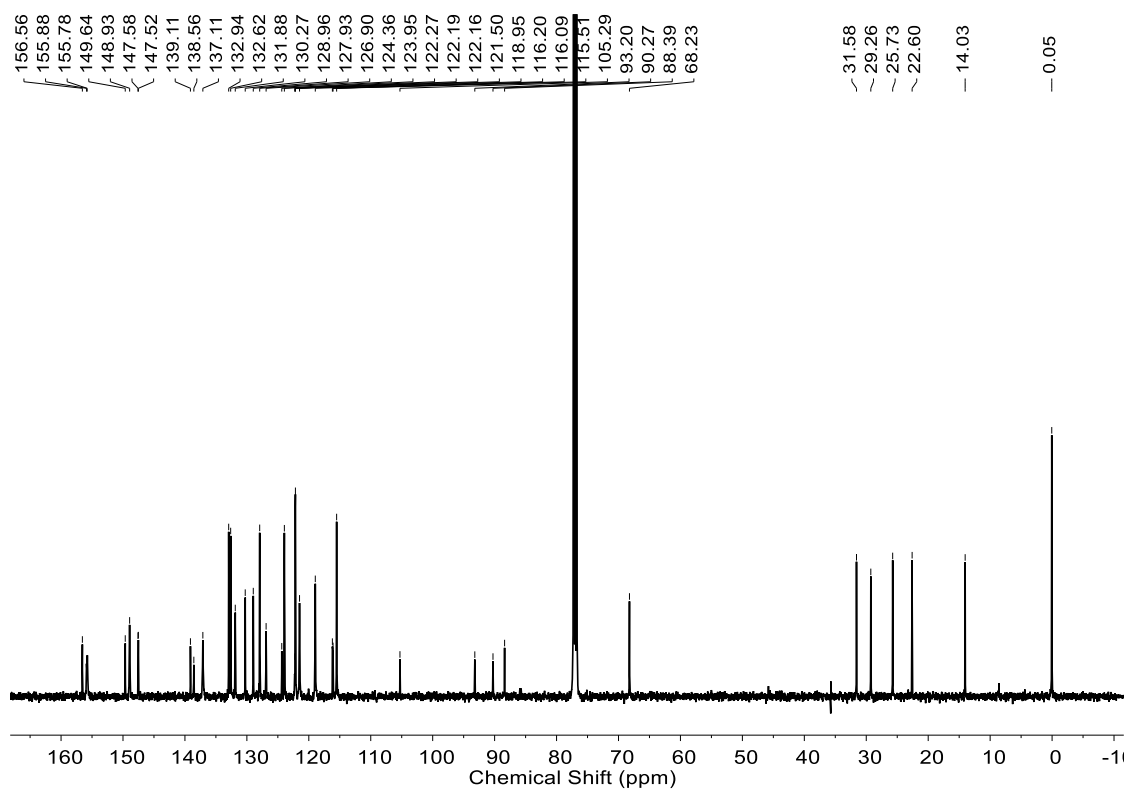

Figure S27.  $^{13}\text{C}$  NMR (125 MHz,  $\text{CDCl}_3$ ) spectrum of **S-14**.

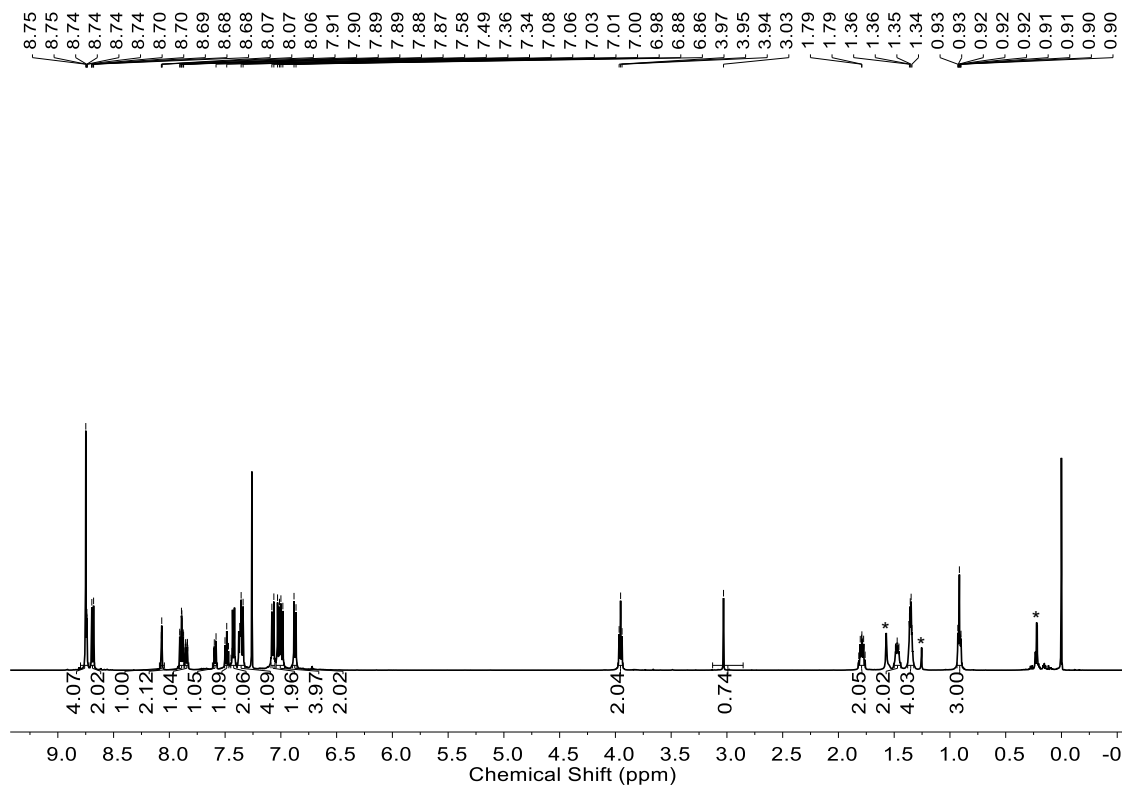

**Figure S28.** <sup>1</sup>H NMR (500 MHz, CDCl<sub>3</sub>) spectrum of S-15 (asterisk represent H<sub>2</sub>O, grease, grease, from left to right).

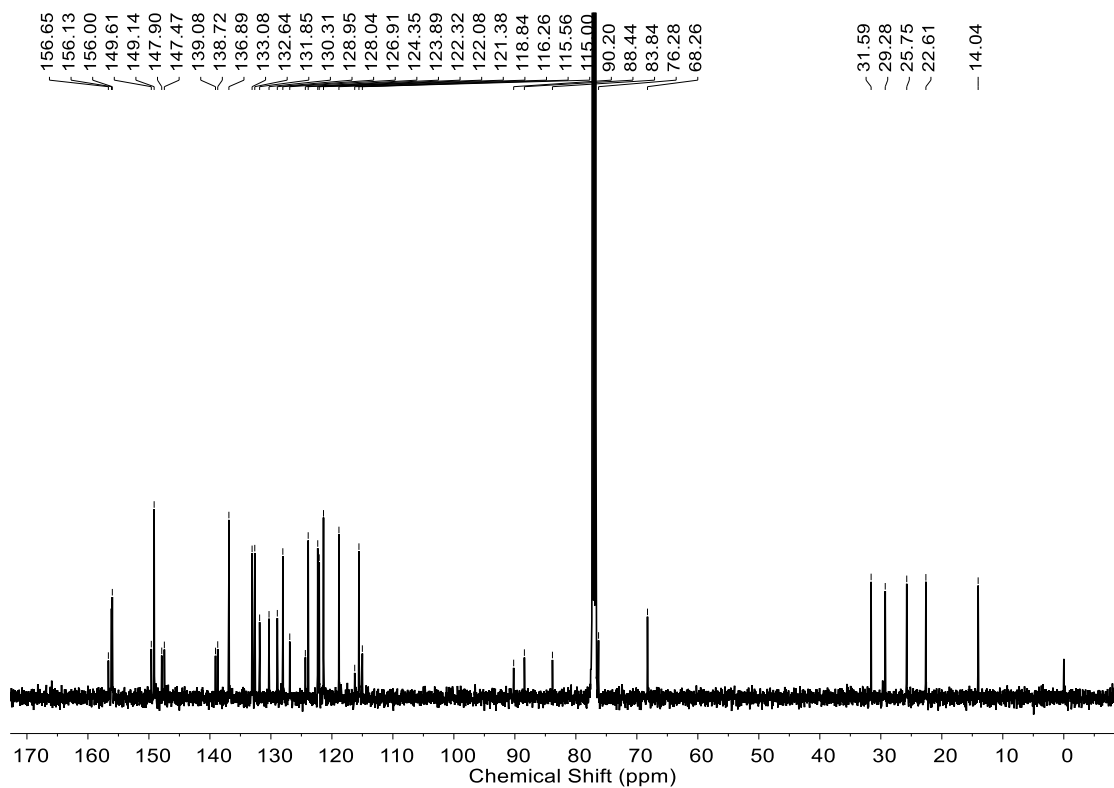

**Figure S29.** <sup>13</sup>C NMR (125 MHz, CDCl<sub>3</sub>) spectrum of S-15.



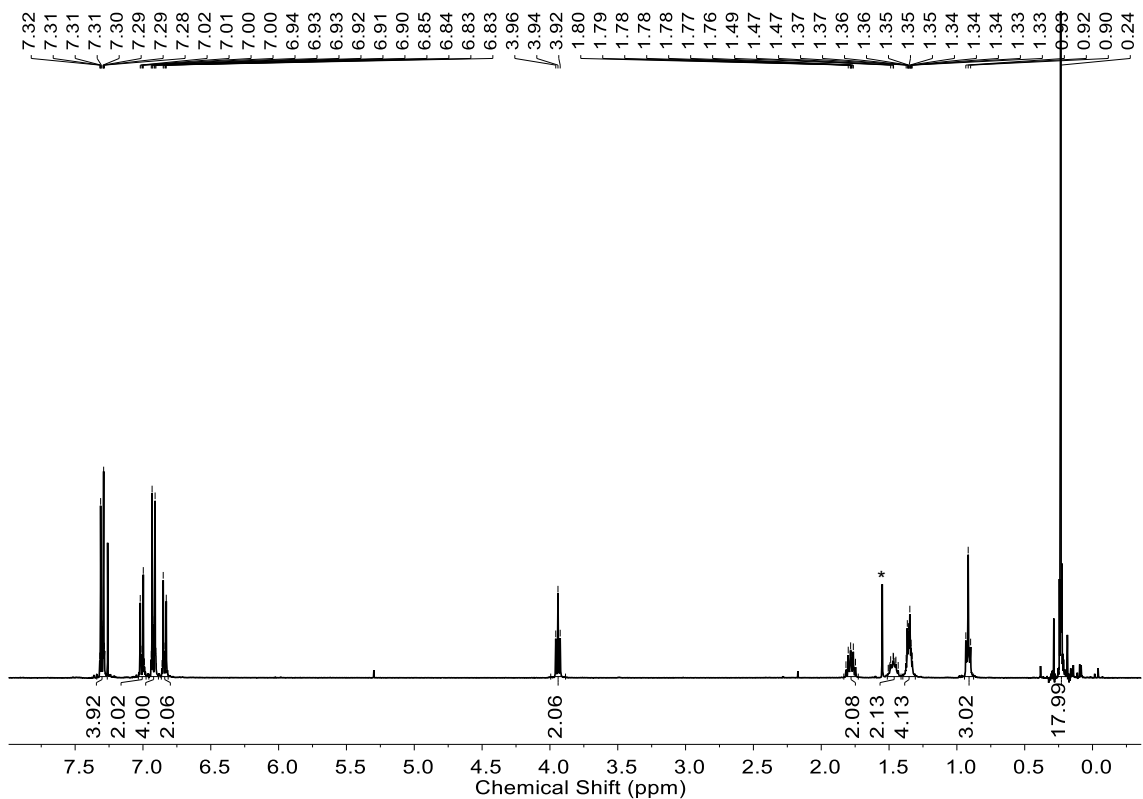

**Figure S30.**  $^1\text{H}$  NMR (400 MHz,  $\text{CDCl}_3$ ) spectrum of **4** (asterisk represent  $\text{H}_2\text{O}$ ).

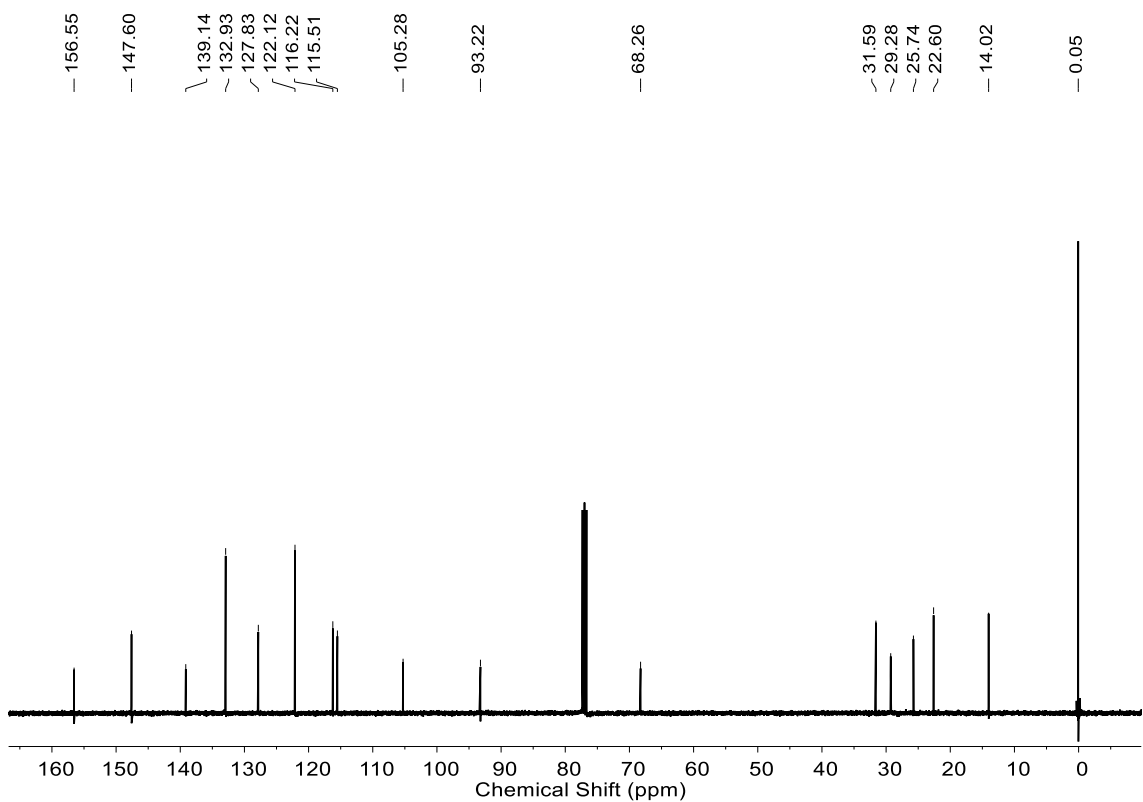

**Figure S31.**  $^{13}\text{C}$  NMR (100 MHz,  $\text{CDCl}_3$ ) spectrum of **4**.

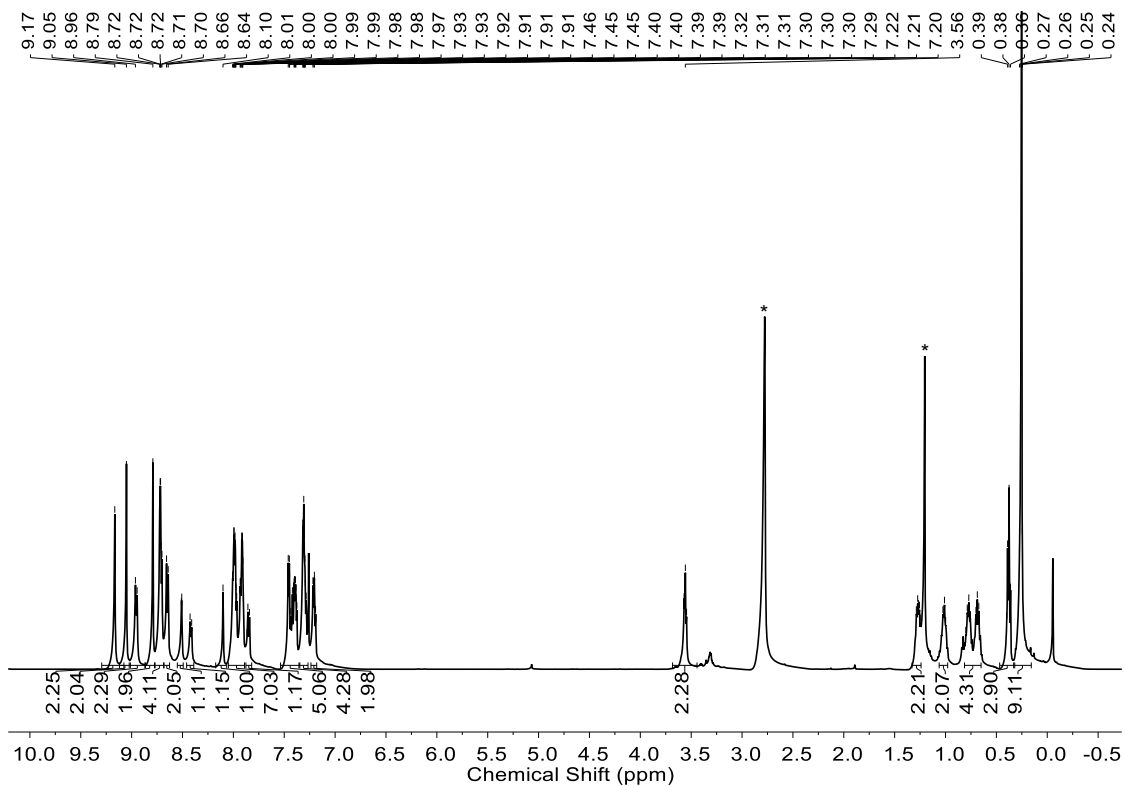

**Figure S32.**  $^1\text{H}$  NMR (500 MHz,  $\text{CDCl}_3 + 3\% \text{CD}_3\text{OD}$ ) spectrum of **S-18** (asterisks represent residual solvent).

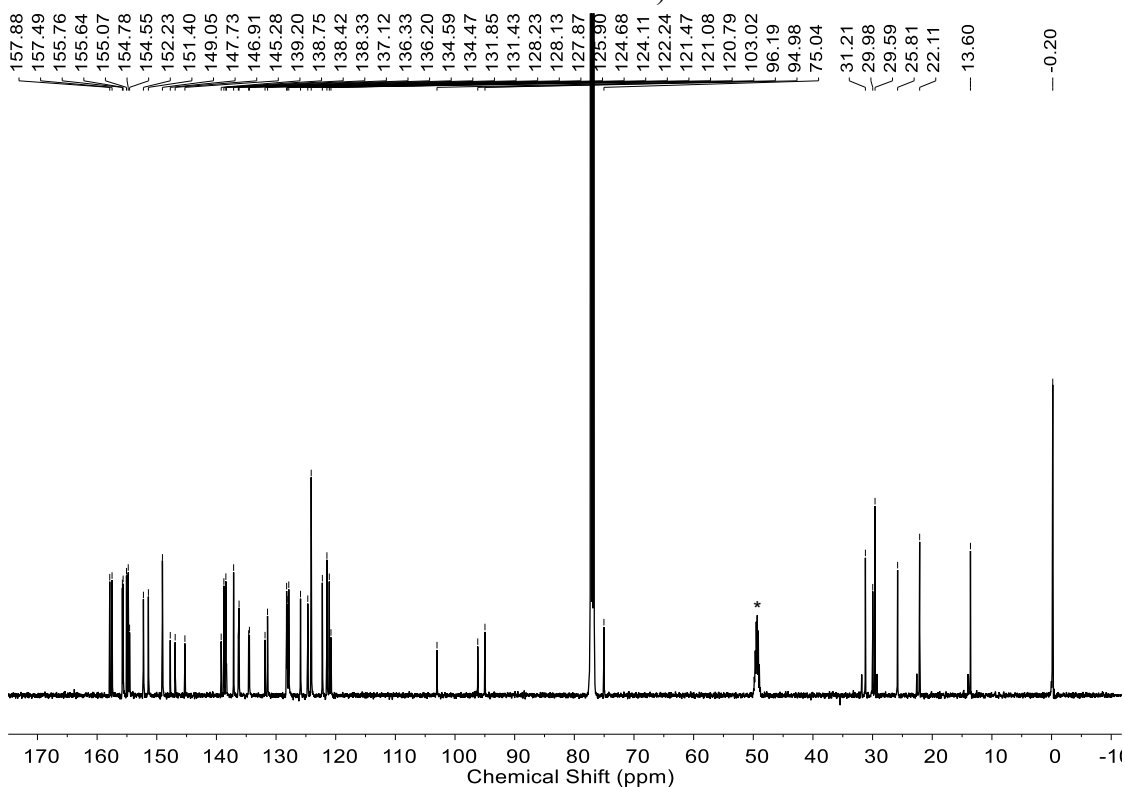

**Figure S33.**  $^{13}\text{C}$  NMR (125 MHz,  $\text{CDCl}_3 + 3\% \text{CD}_3\text{OD}$ ) spectrum of **S-18** (asterisk represents residual solvent).

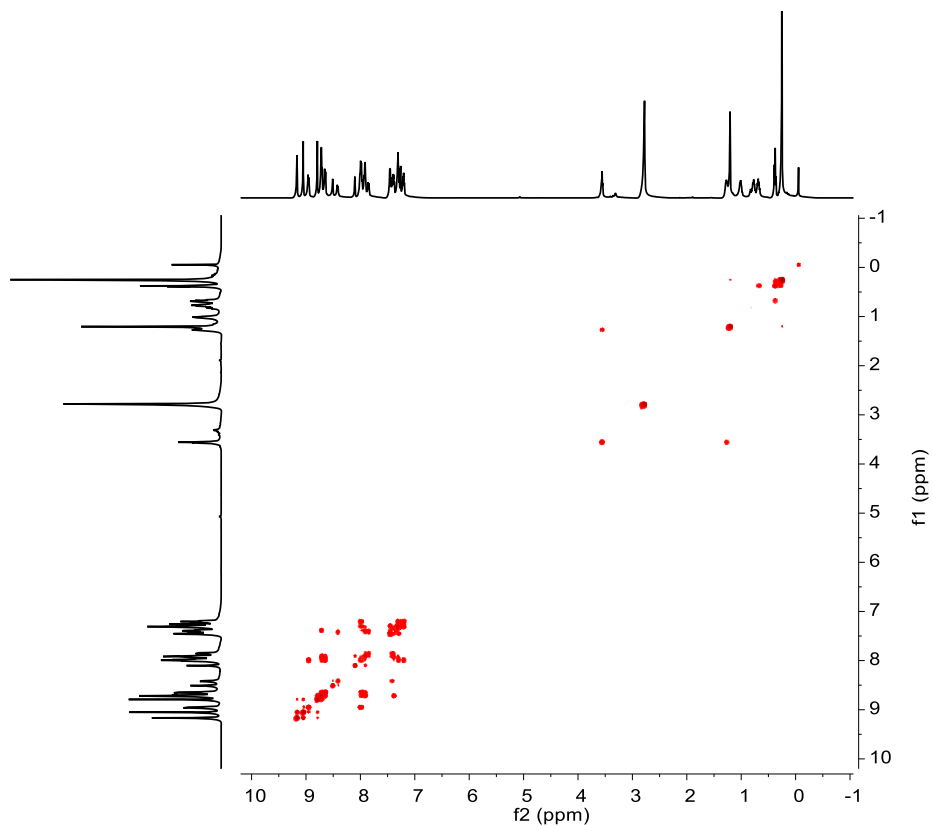

**Figure S34.** 2D COSY NMR (500 MHz,  $\text{CDCl}_3+3\% \text{CD}_3\text{OD}$ ) spectrum of **S-18**.

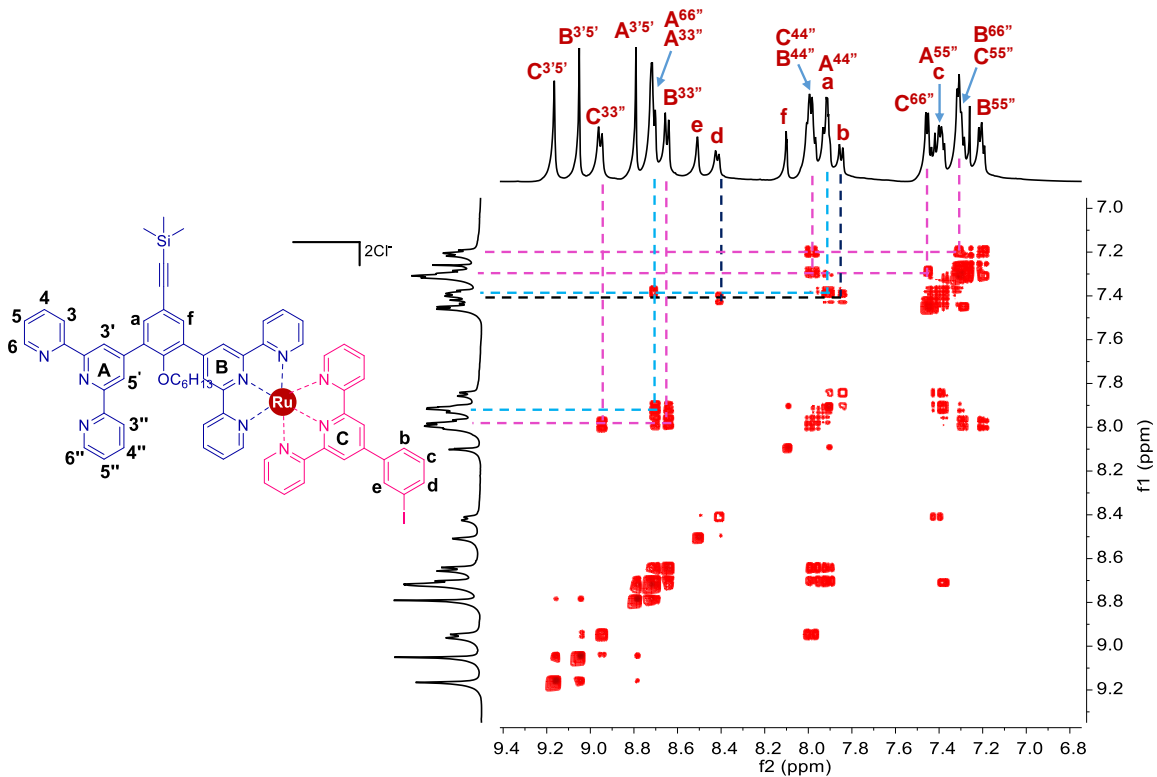

**Figure S35.** 2D COSY NMR (500 MHz,  $\text{CDCl}_3+3\% \text{CD}_3\text{OD}$ ) spectrum of **S-18** (aromatic region).

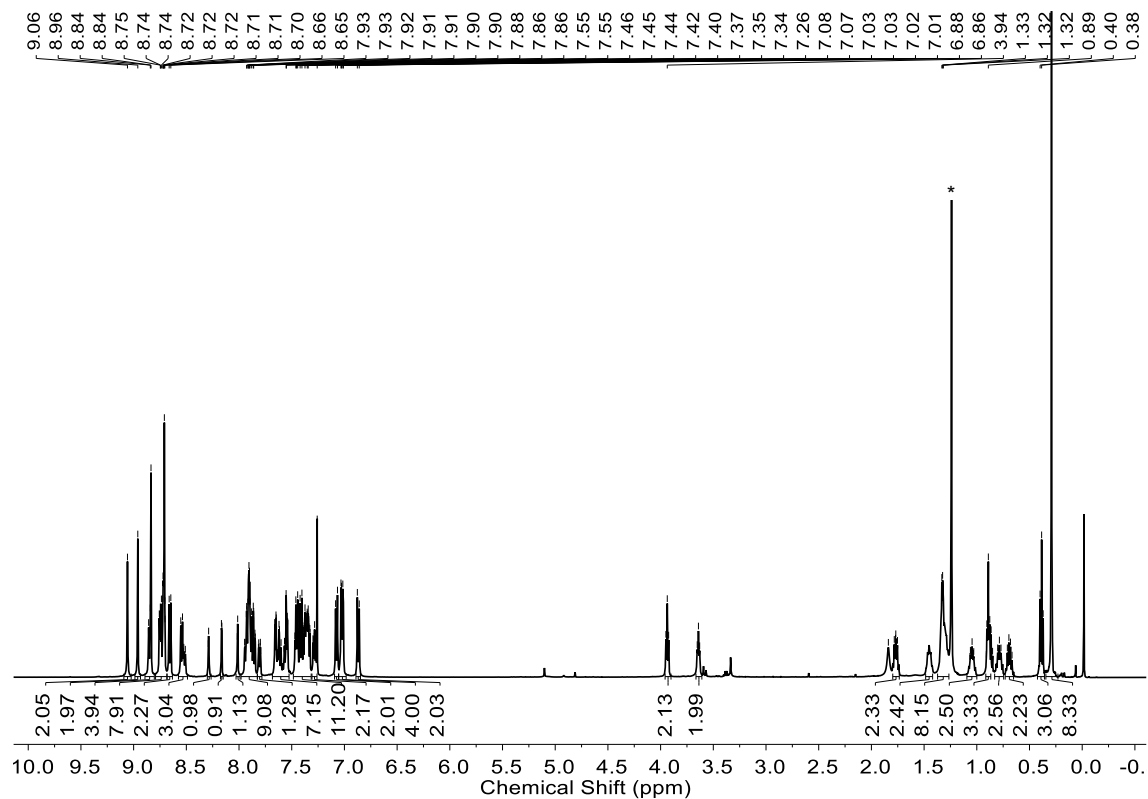

**Figure S36.**  $^1\text{H}$  NMR (500 MHz,  $\text{CDCl}_3+3\% \text{CD}_3\text{OD}$ ) spectrum of **S-19** (asterisk represents residual solvent).

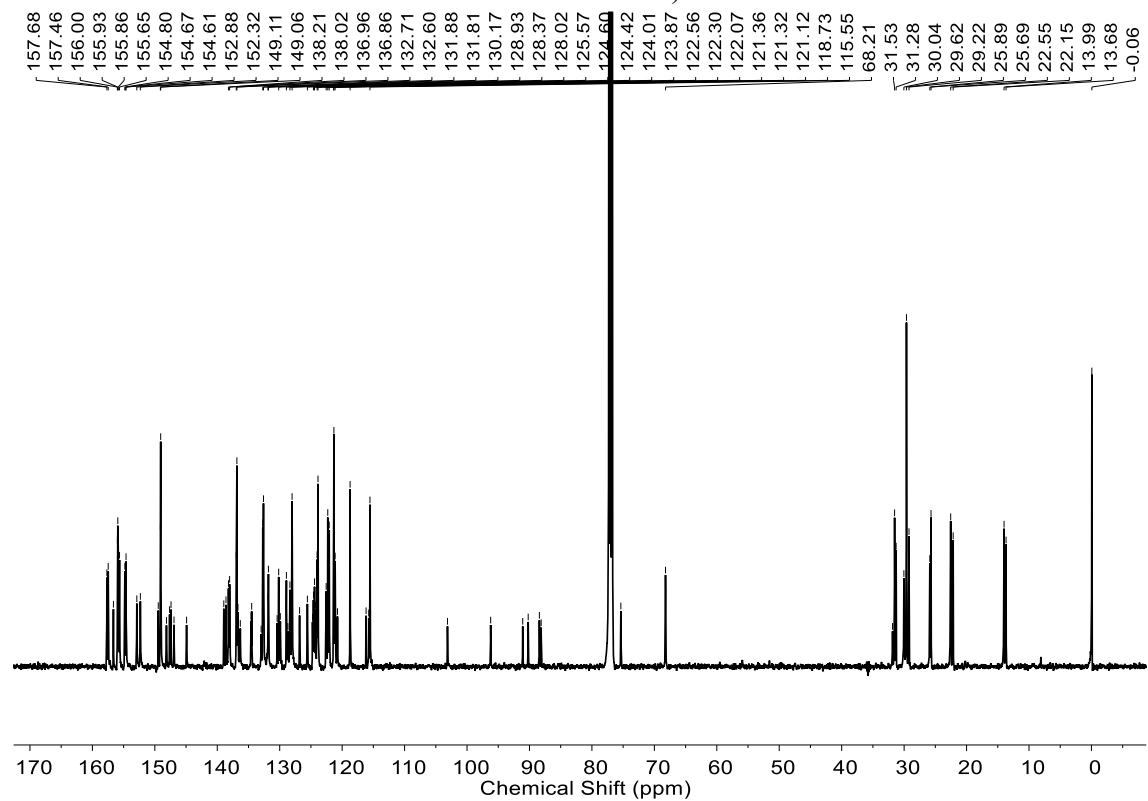

**Figure S37.**  $^{13}\text{C}$  NMR (125 MHz,  $\text{CDCl}_3+3\% \text{CD}_3\text{OD}$ ) spectrum of **S-19**.

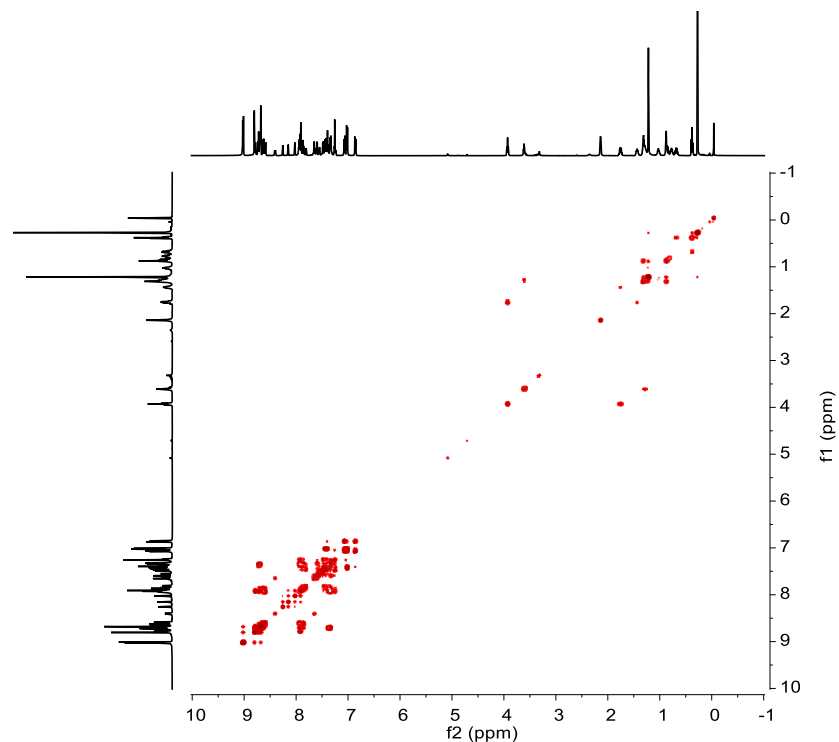

Figure S38. 2D COSY NMR (500 MHz,  $\text{CDCl}_3+3\% \text{CD}_3\text{OD}$ ) spectrum of S-19.

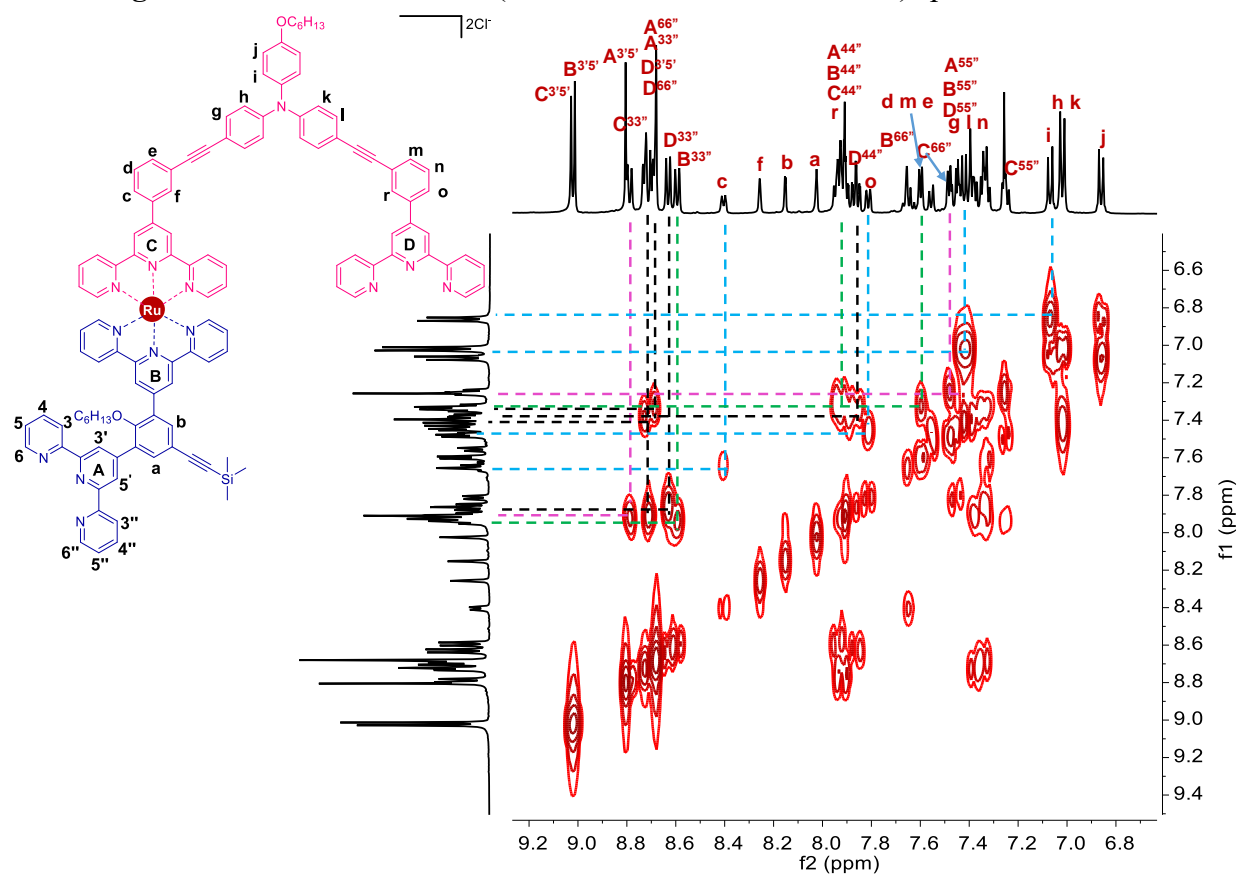

Figure S39. 2D COSY NMR (500 MHz,  $\text{CDCl}_3+3\% \text{CD}_3\text{OD}$ ) spectrum of S-19 (aromatic region).

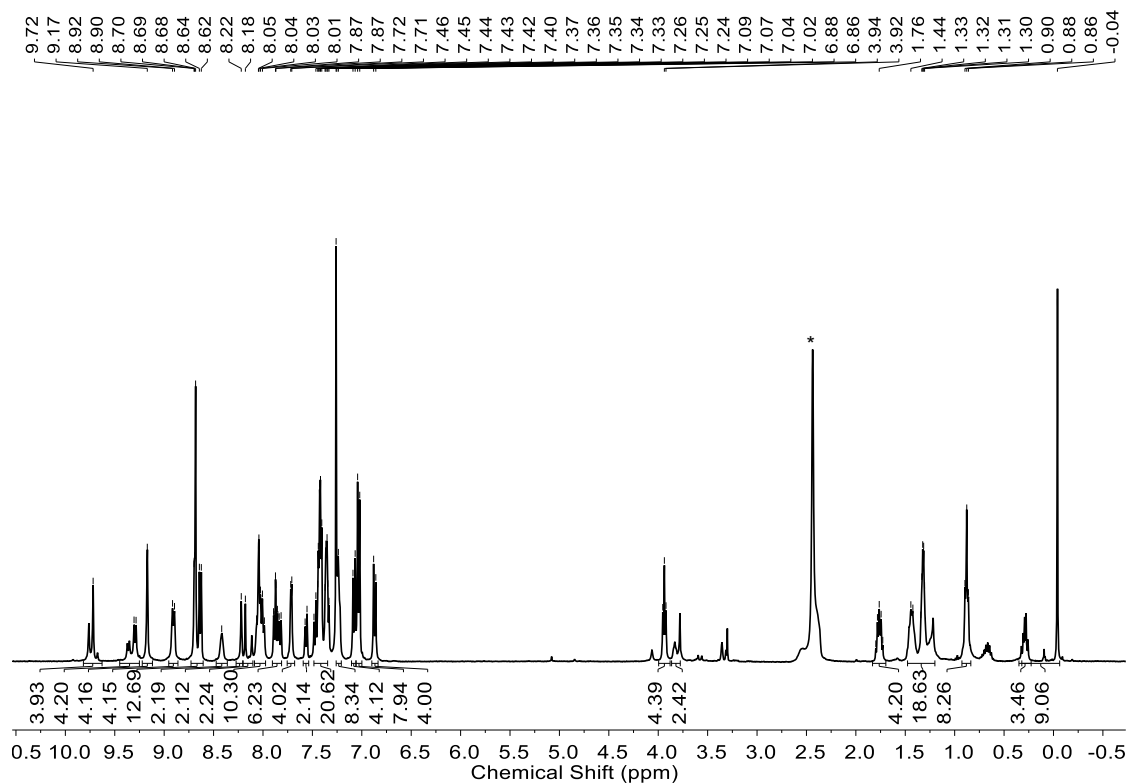

**Figure S40.**  $^1\text{H}$  NMR (500 MHz,  $\text{CDCl}_3+3\% \text{CD}_3\text{OD}$ ) spectrum of **S-21** (asterisk represents residual solvent).

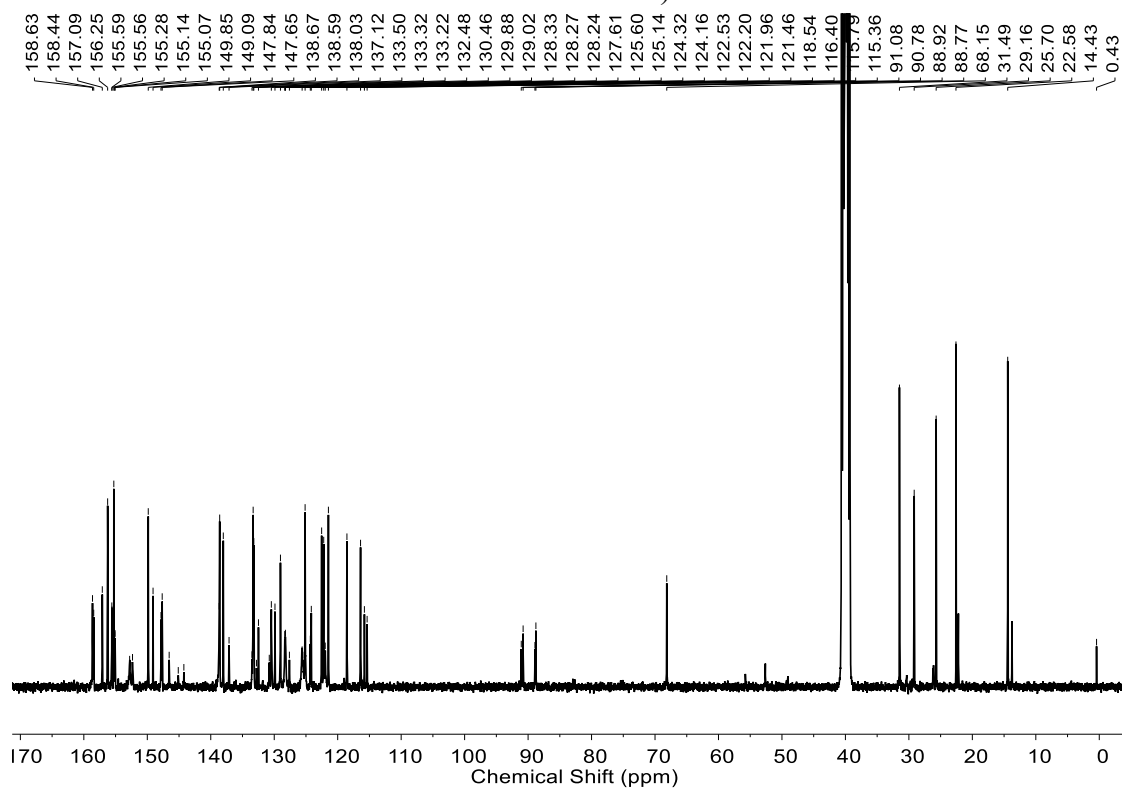

**Figure S41.**  $^{13}\text{C}$  NMR (100 MHz,  $\text{DMSO-}d_6$ ) spectrum of **S-21**.

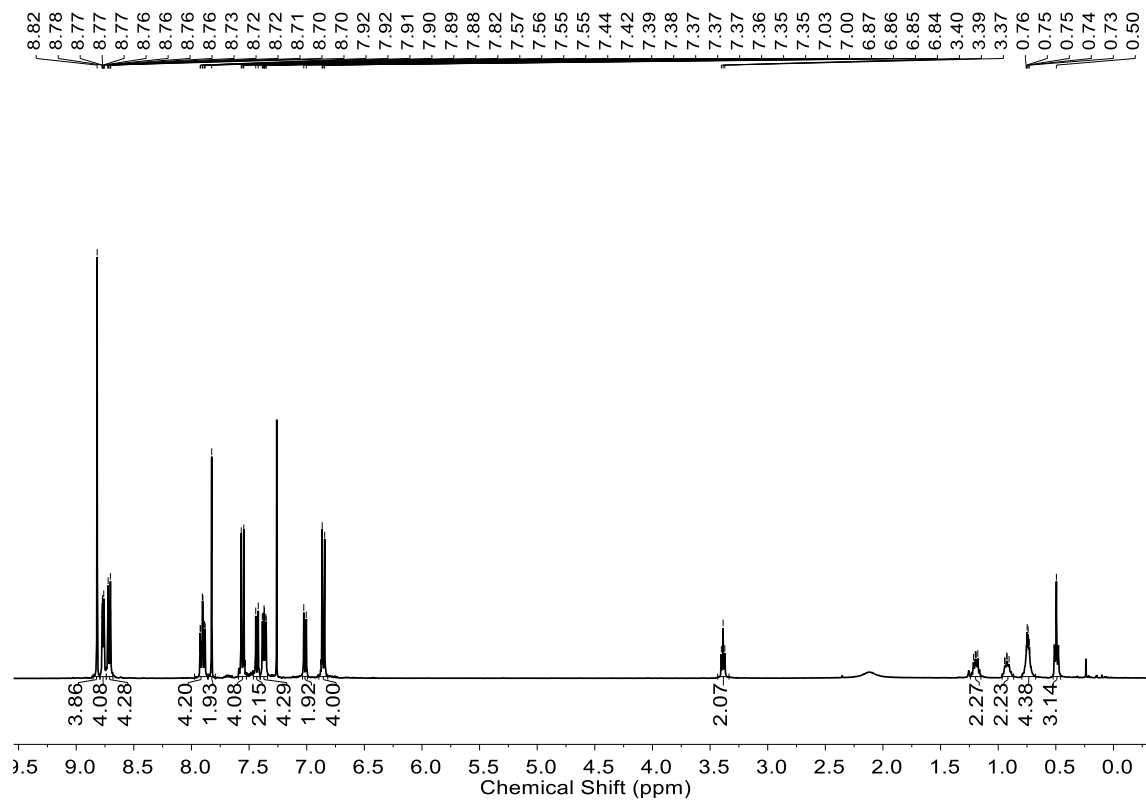

Figure S42.  $^1\text{H}$  NMR (400 MHz,  $\text{CDCl}_3$ ) spectrum of S-22.

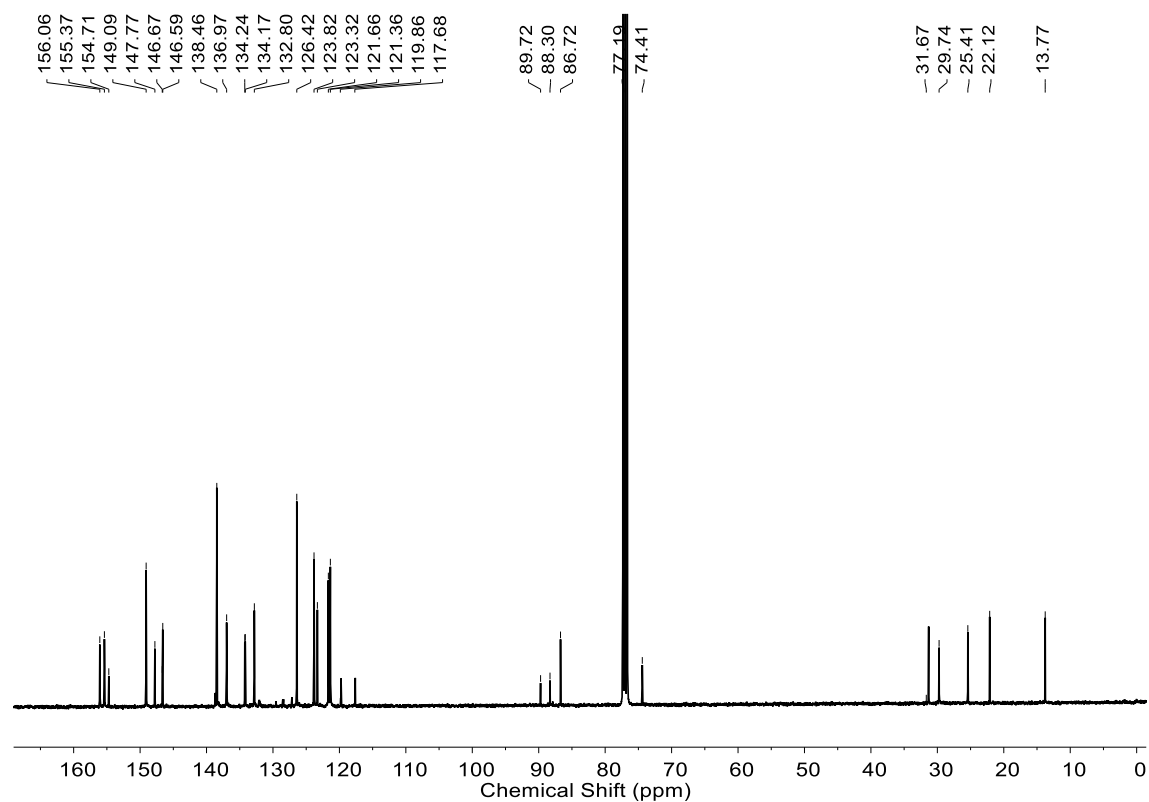

Figure S43.  $^{13}\text{C}$  NMR (100 MHz,  $\text{CDCl}_3$ ) spectrum of S-22.

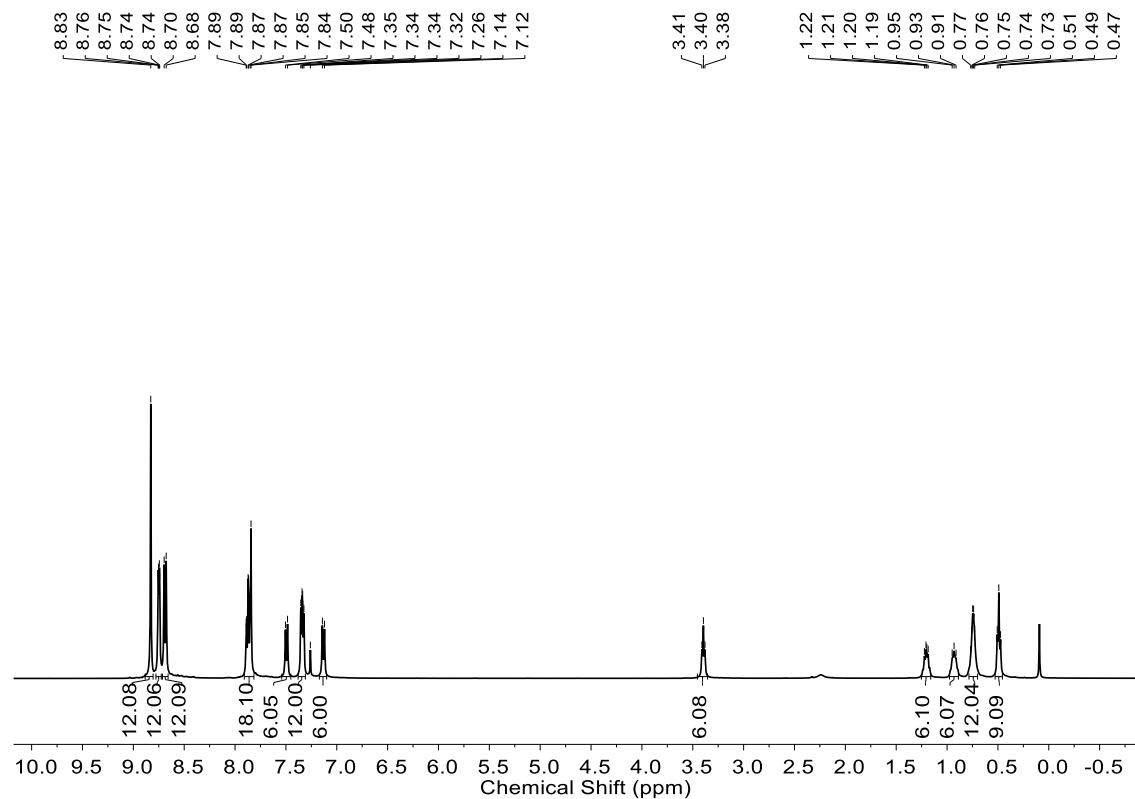

**Figure S44.**  $^1\text{H}$  NMR (400 MHz,  $\text{CDCl}_3$ ) spectrum of **L**.

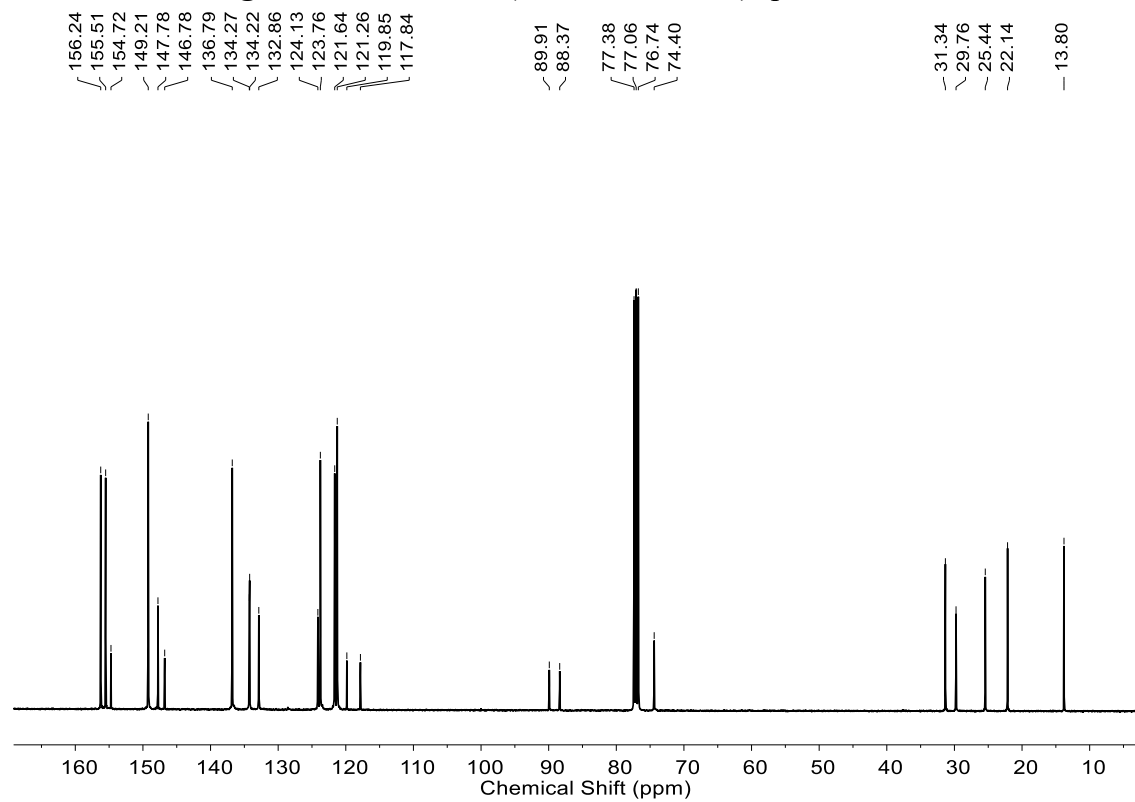

**Figure S45.**  $^{13}\text{C}$  NMR (100 MHz,  $\text{CDCl}_3$ ) spectrum of **L**.



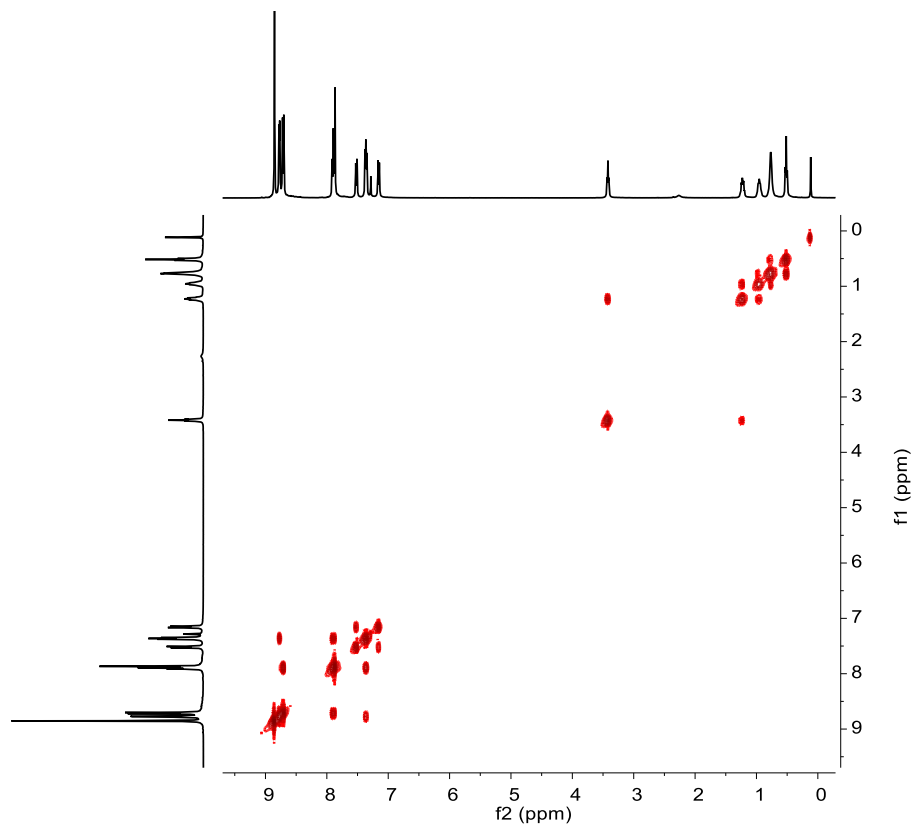

Figure S46. 2D COSY NMR (400 MHz,  $\text{CDCl}_3$ ) spectrum of compound L.

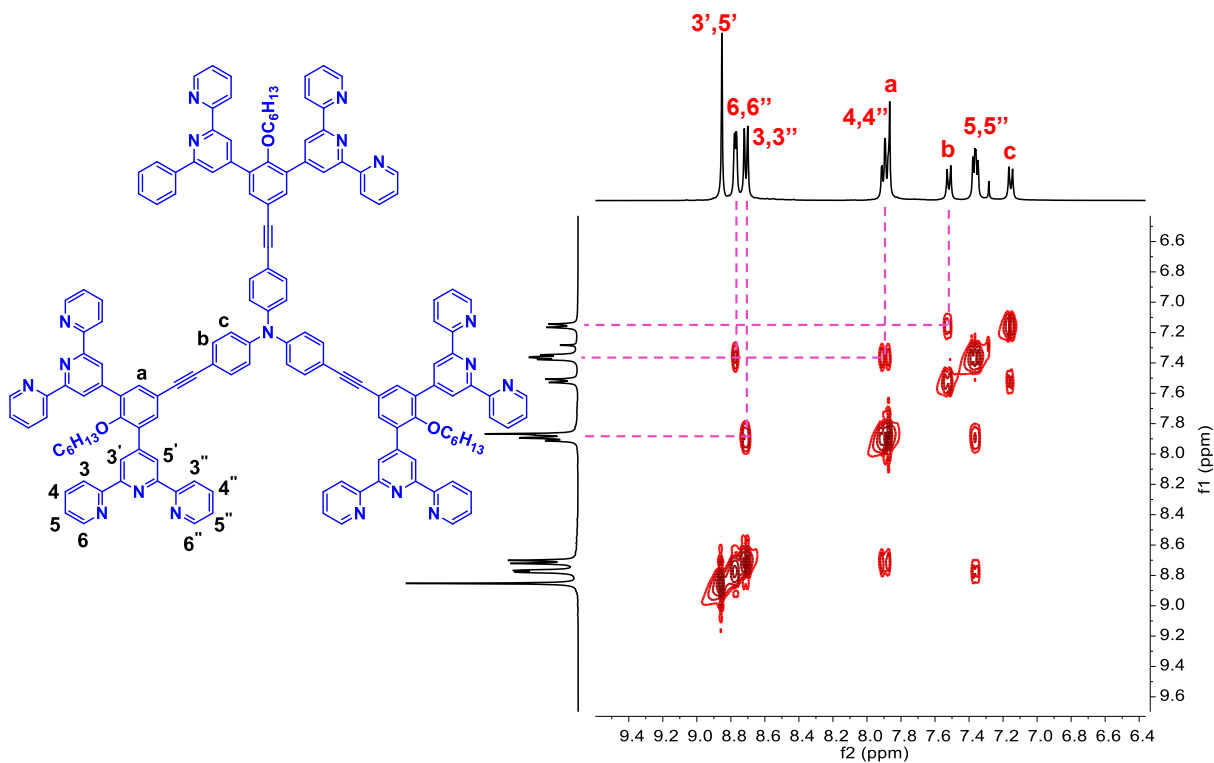

Figure S47. 2D COSY NMR (400 MHz,  $\text{CDCl}_3$ ) spectrum of compound L (aromatic region).

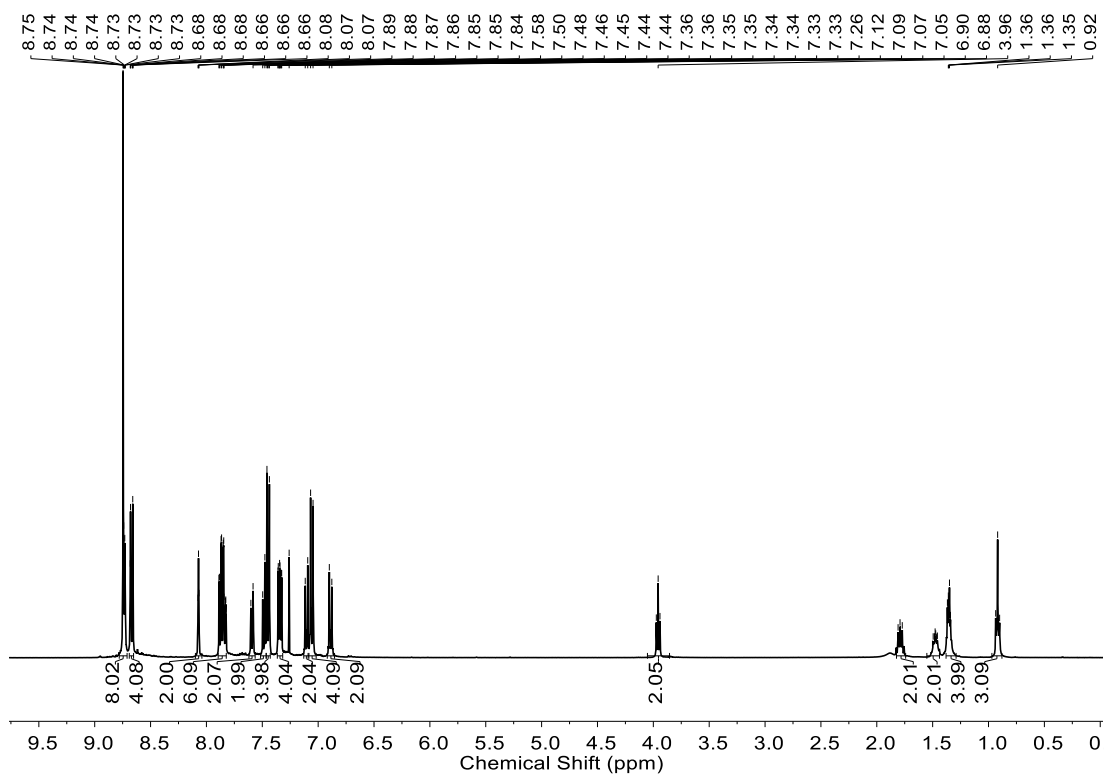

**Figure S48.**  $^1\text{H}$  NMR (400 MHz,  $\text{CDCl}_3$ ) spectrum of ligand LA.

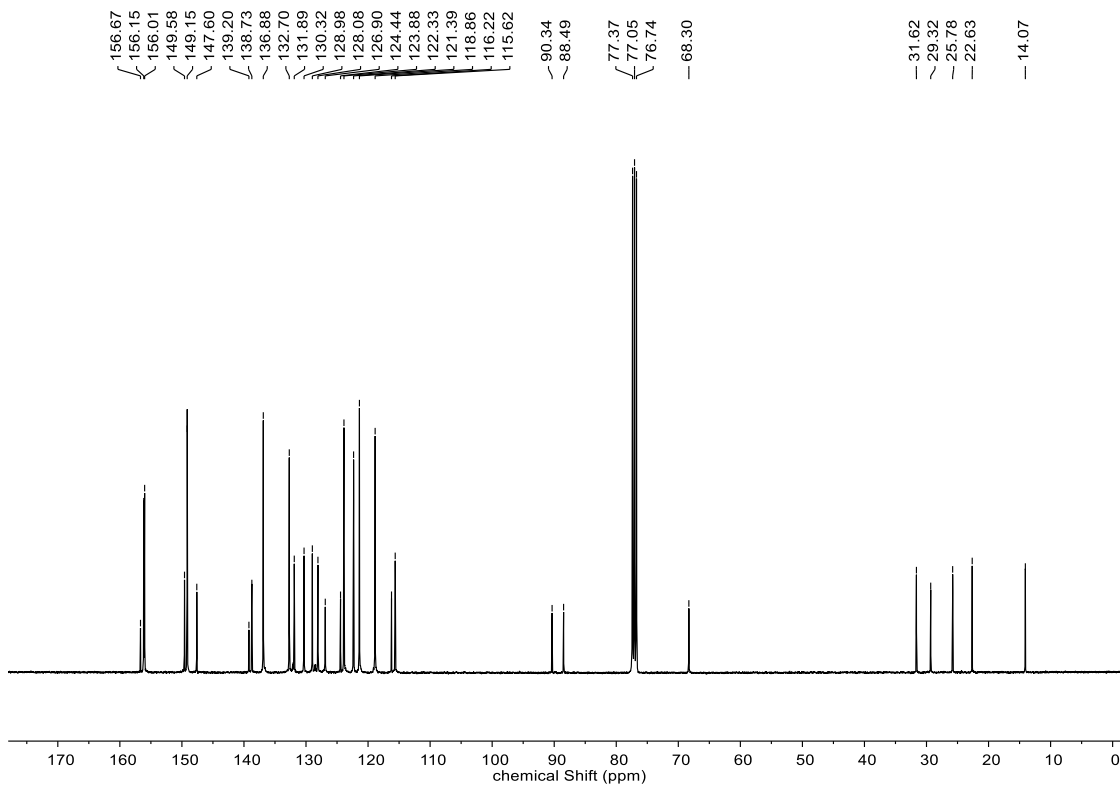

**Figure S49.**  $^{13}\text{C}$  NMR (100 MHz,  $\text{CDCl}_3$ ) spectrum of ligand LA.

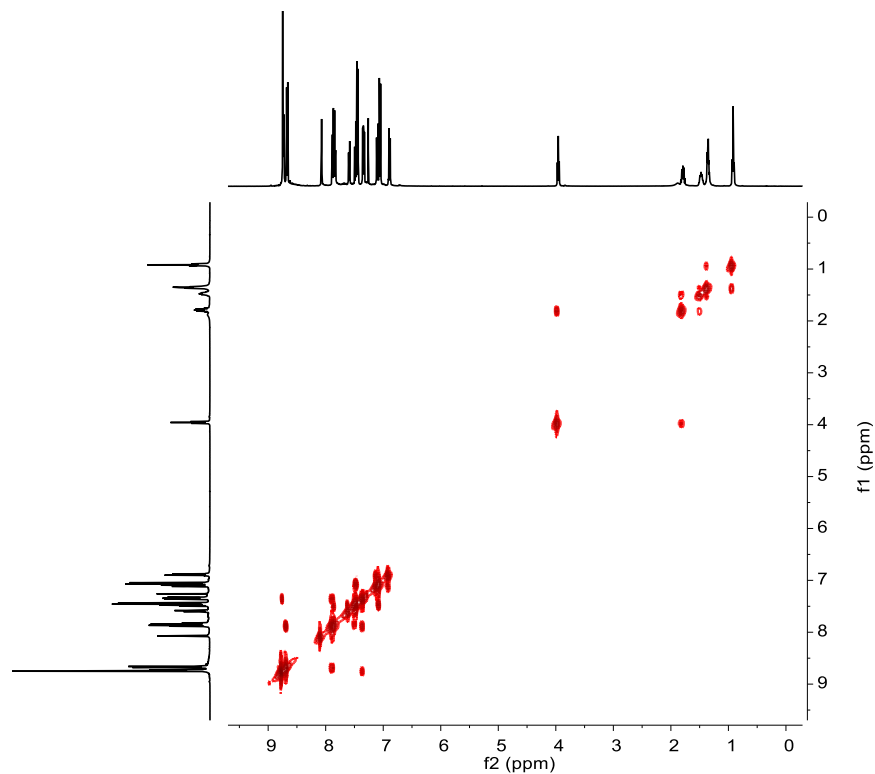

Figure S50. 2D COSY NMR (400 MHz, CDCl<sub>3</sub>) spectrum of ligand LA.

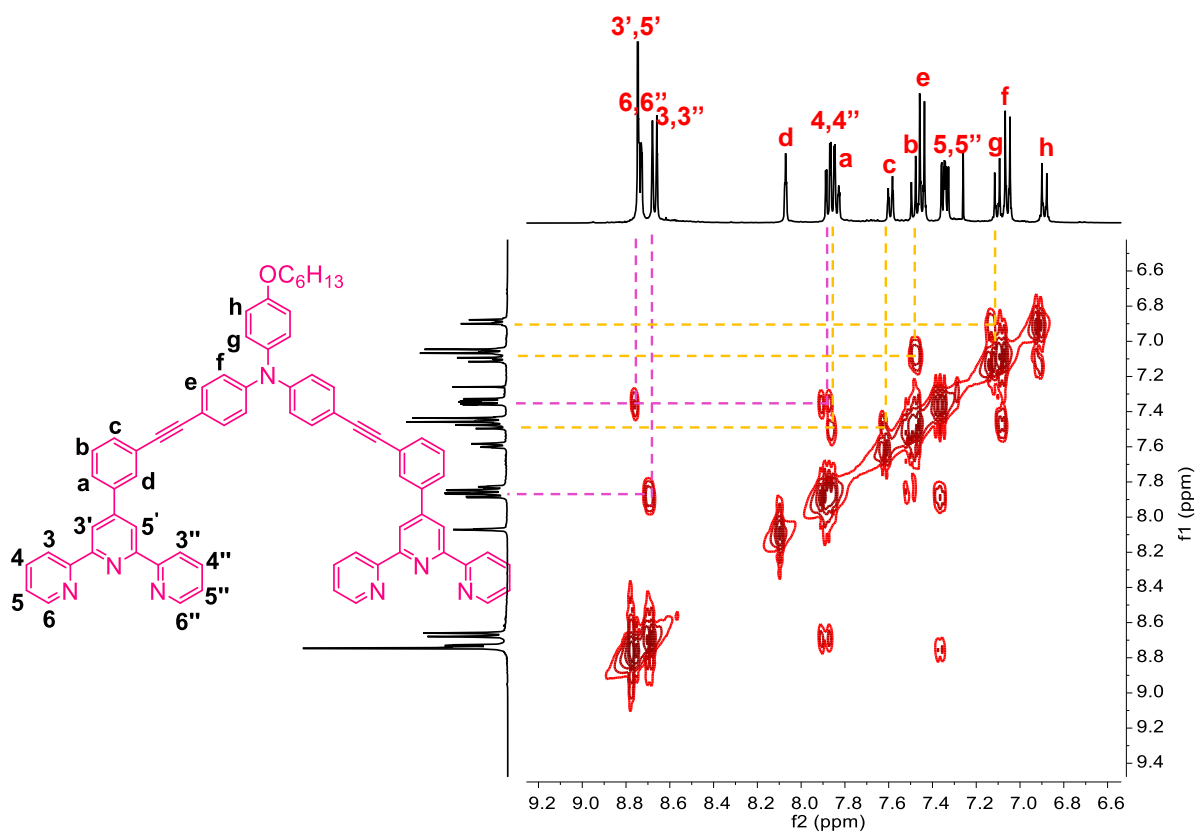

Figure S51. 2D COSY NMR (400 MHz, CDCl<sub>3</sub>) spectrum of ligand LA (aromatic region).

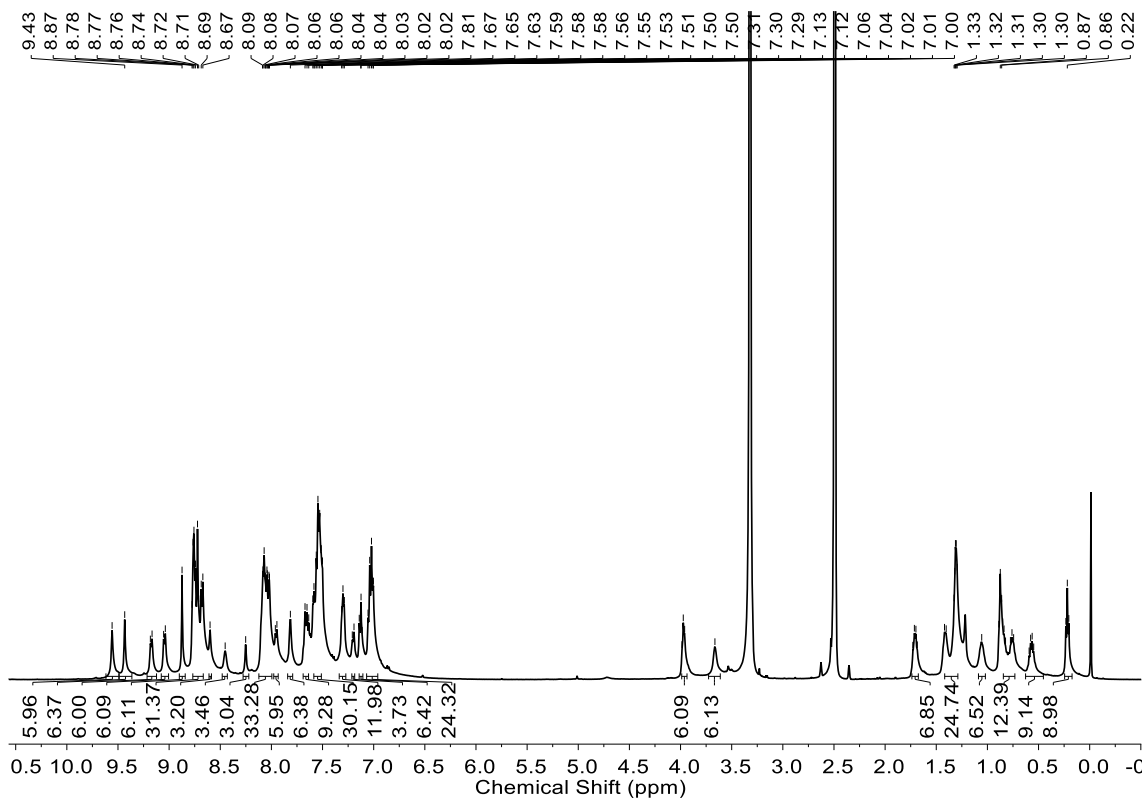

Figure S52.  $^1\text{H}$  NMR (500 MHz,  $\text{DMSO-}d_6$ ) spectrum of ligand **LB**.

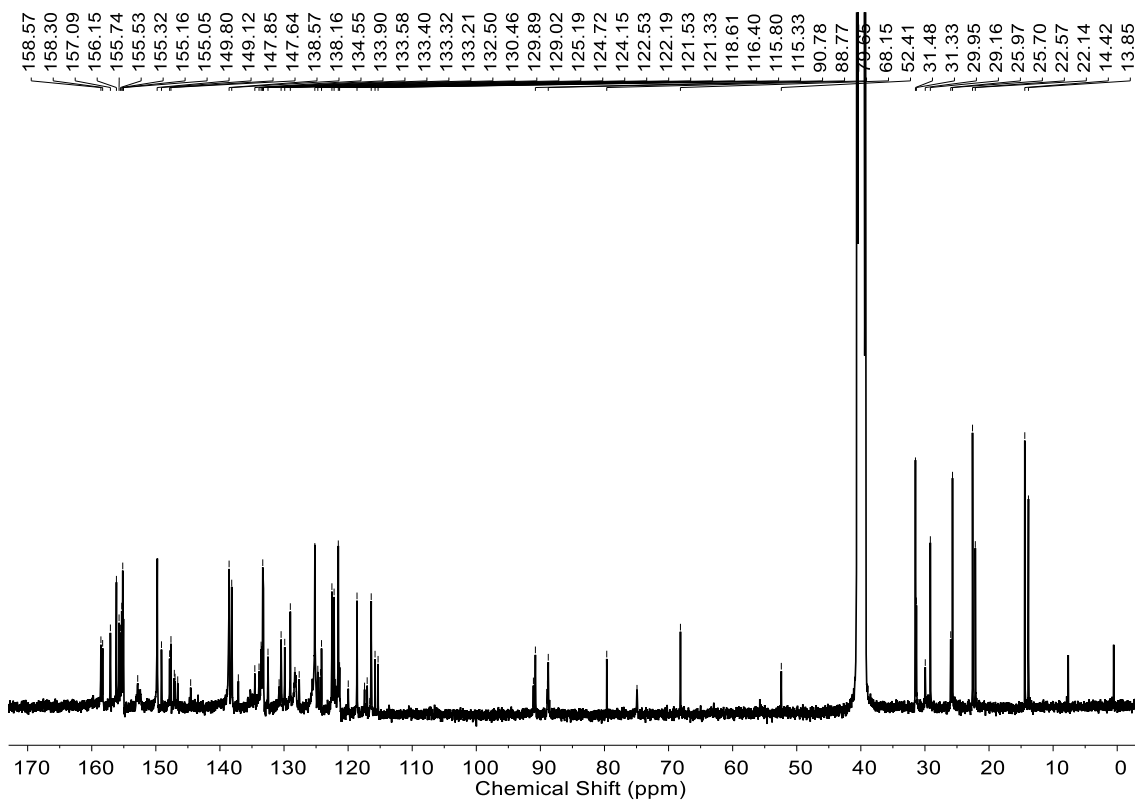

Figure S53.  $^{13}\text{C}$  NMR (100 MHz,  $\text{DMSO-}d_6$ ) spectrum of ligand **LB**.

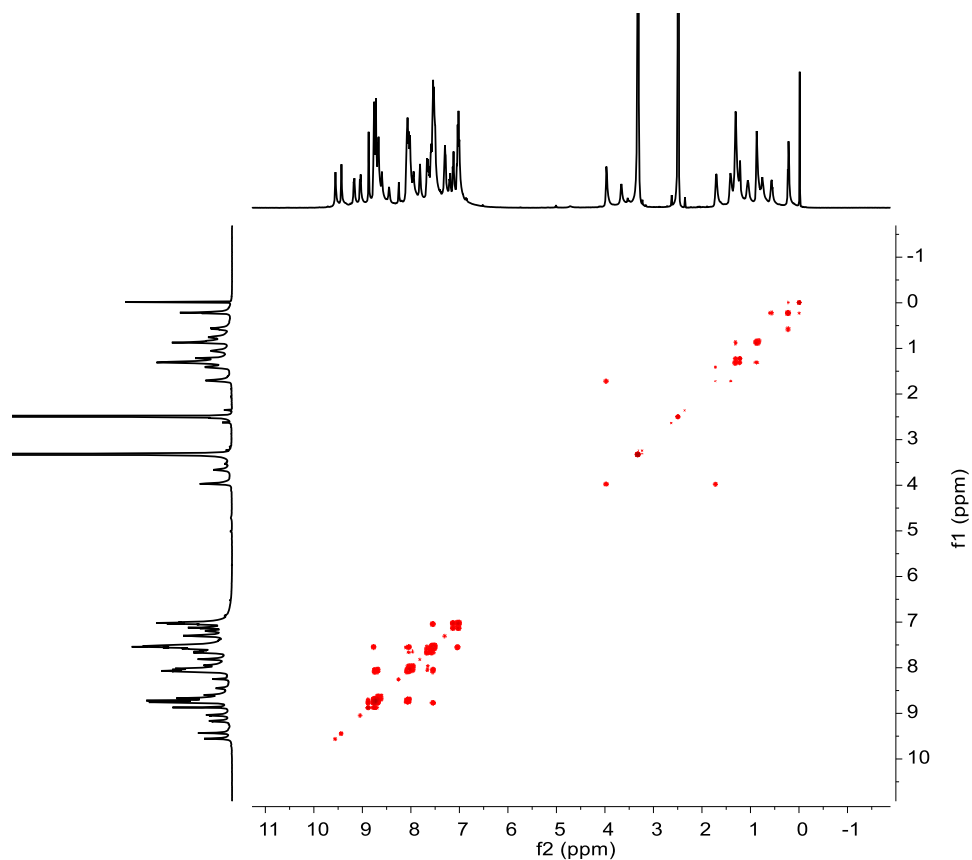

Figure S54. 2D COSY NMR (500 MHz, DMSO-*d*<sub>6</sub>) spectrum of ligand **LB**.

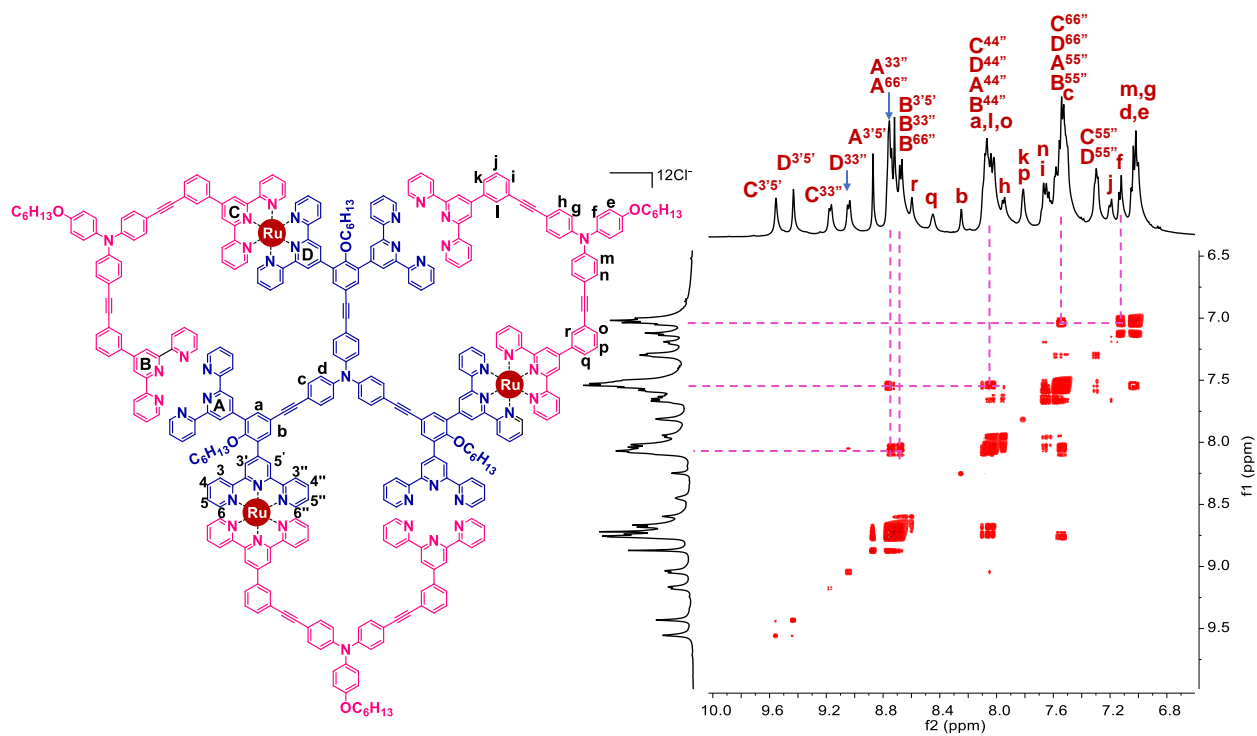

Figure S55. 2D COSY NMR (500 MHz, DMSO-*d*<sub>6</sub>) spectrum of ligand **LB** (aromatic region).

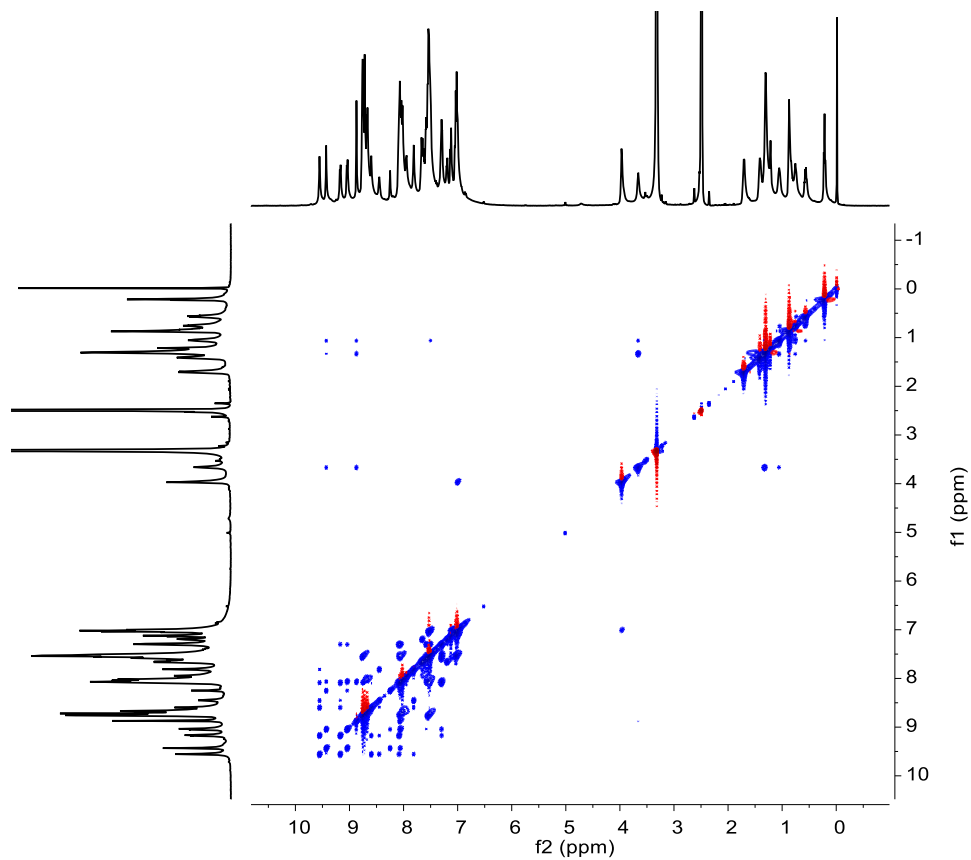

Figure S56. 2D NOESY NMR (500 MHz, DMSO- $d_6$ ) spectrum of ligand **LB**.

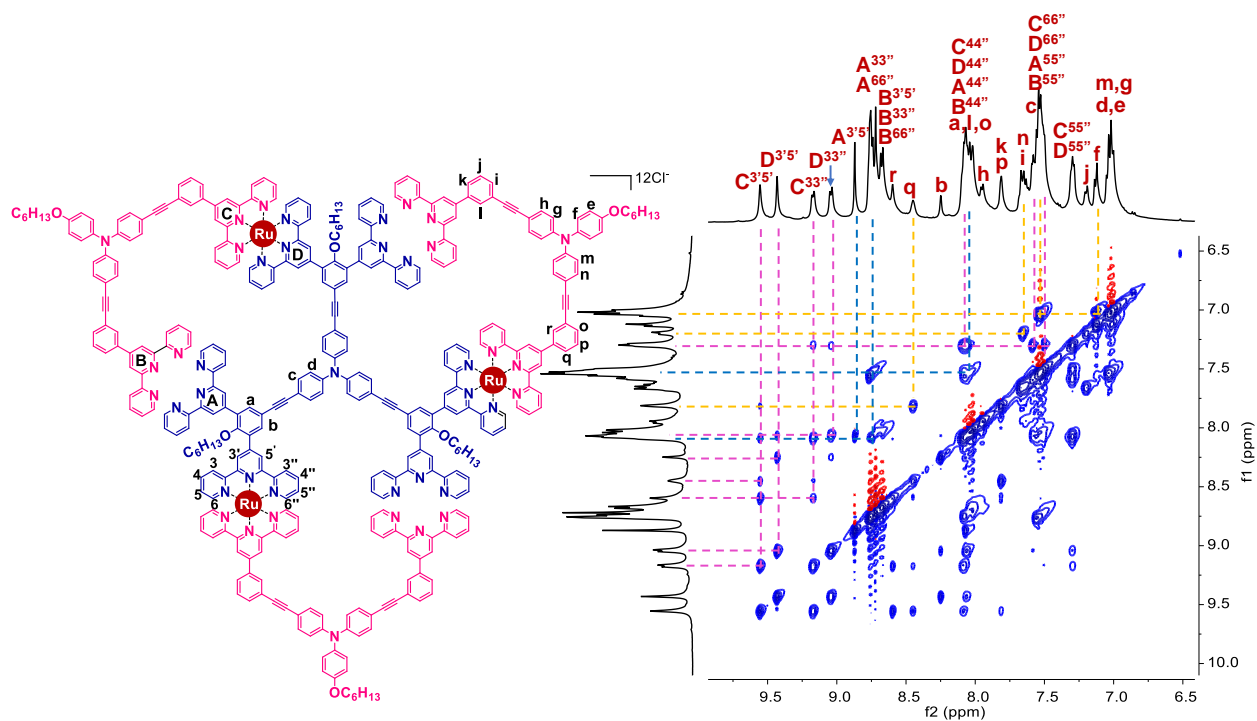

Figure S57. 2D NOESY NMR (500 MHz, DMSO- $d_6$ ) spectrum of ligand **LB** (aromatic region).

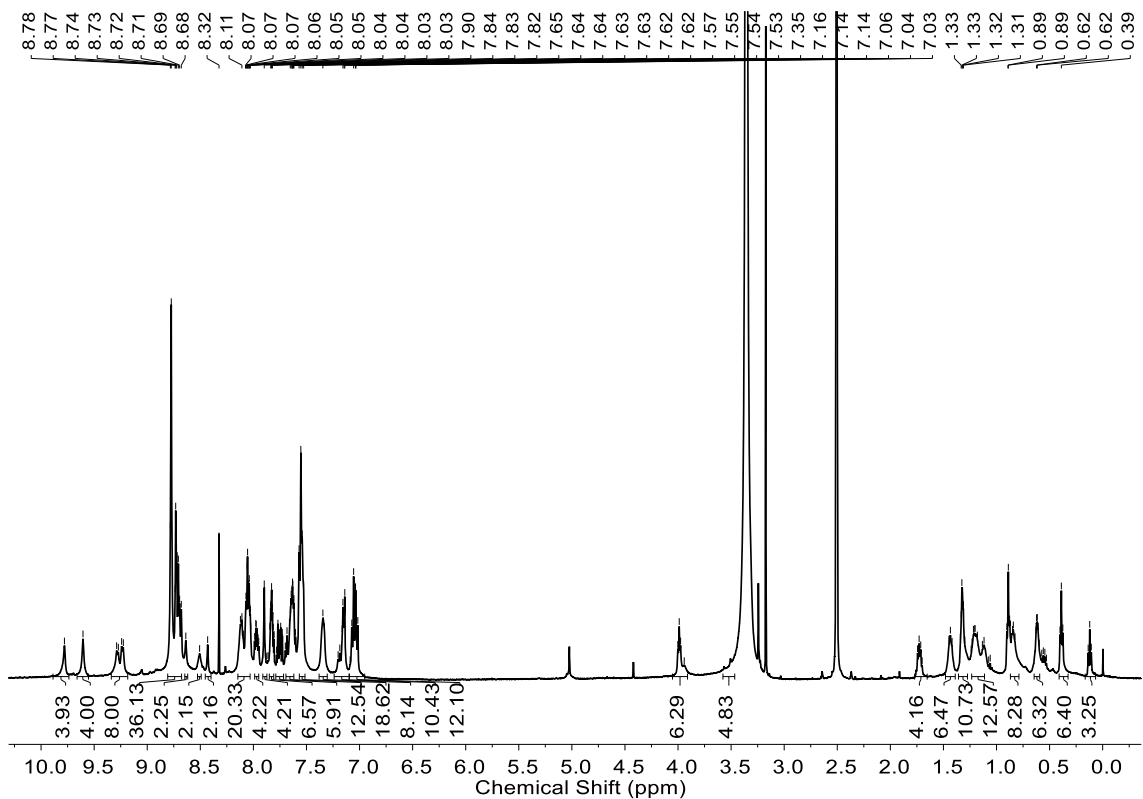

Figure S58.  $^1\text{H}$  NMR (500 MHz,  $\text{DMSO-}d_6$ ) spectrum of ligand LC.

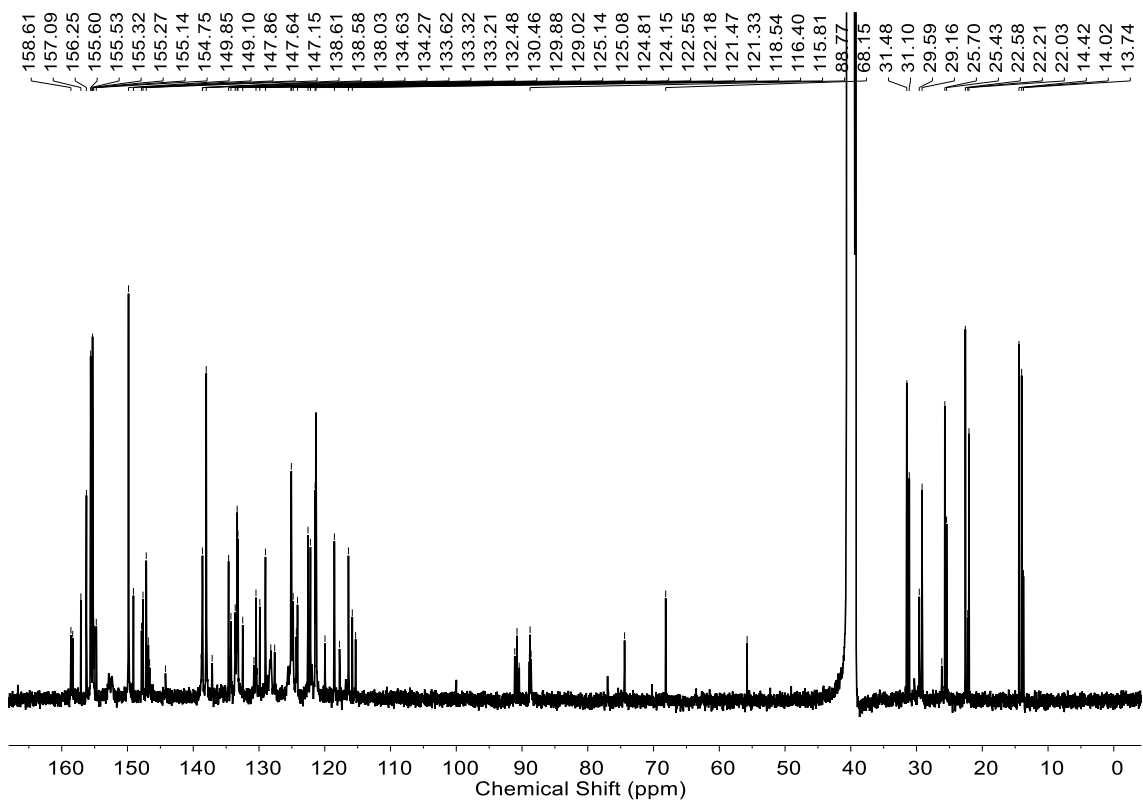

Figure S59.  $^{13}\text{C}$  NMR (100 MHz,  $\text{DMSO-}d_6$ ) spectrum of ligand LC.

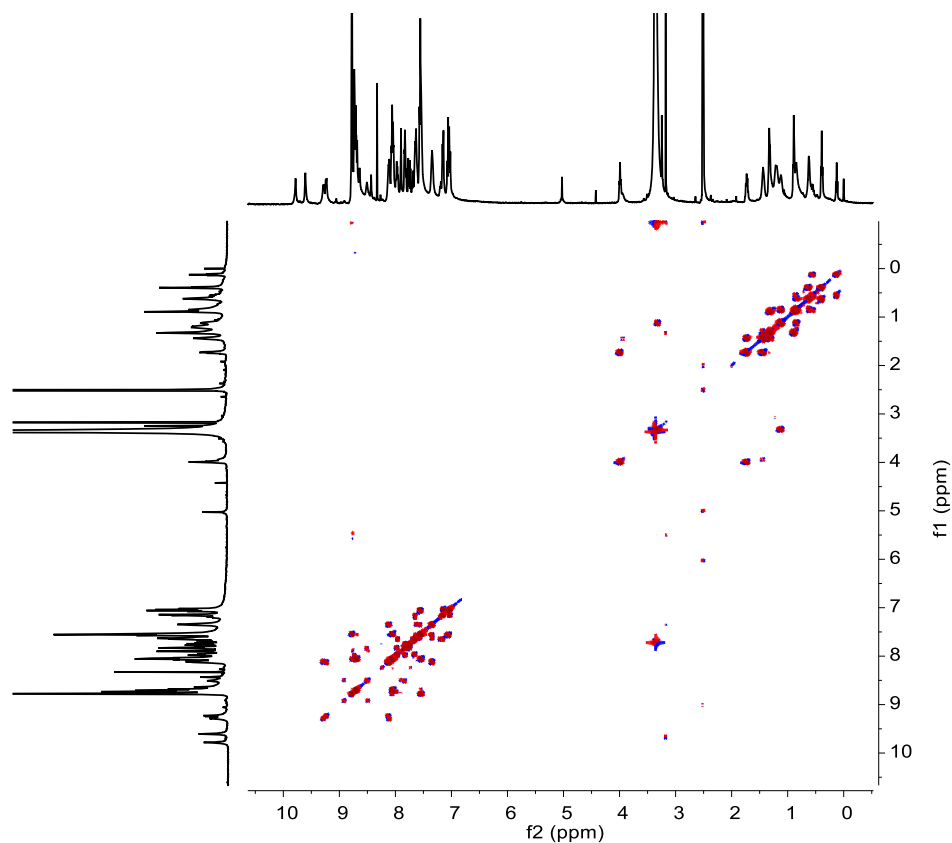

**Figure S60.** 2D COSY NMR (500 MHz, DMSO- $d_6$ ) spectrum of ligand LC (on a Bruker 500-MHz spectrometer).

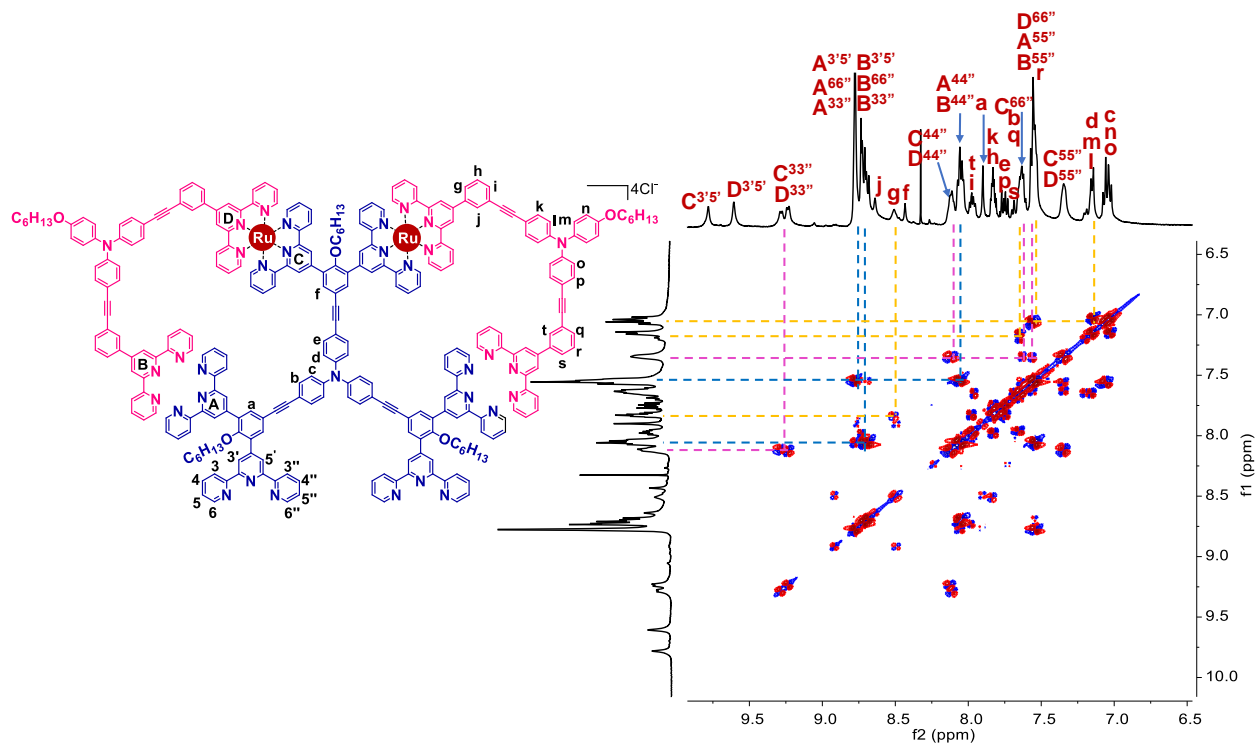

**Figure S61.** 2D COSY NMR (500 MHz, DMSO- $d_6$ ) spectrum of ligand LC (aromatic region, on a Bruker 500-MHz spectrometer).



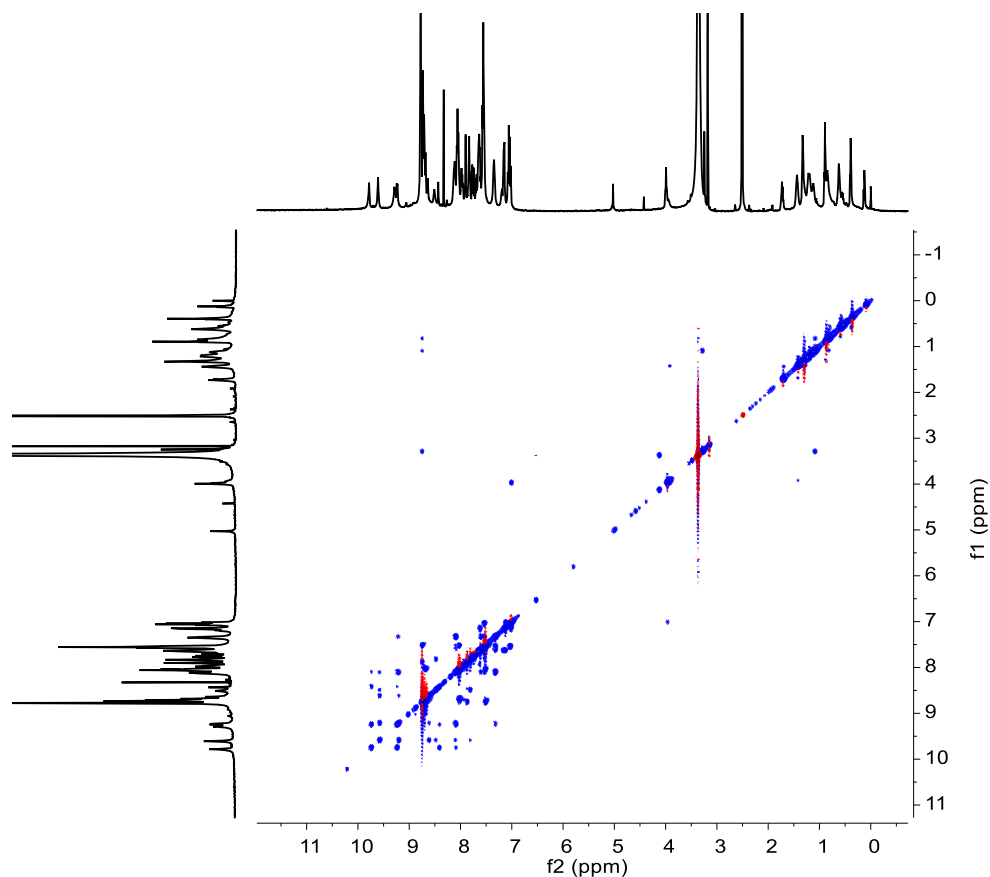

Figure S62. 2D NOESY NMR (500 MHz, DMSO- $d_6$ ) spectrum of ligand LC.

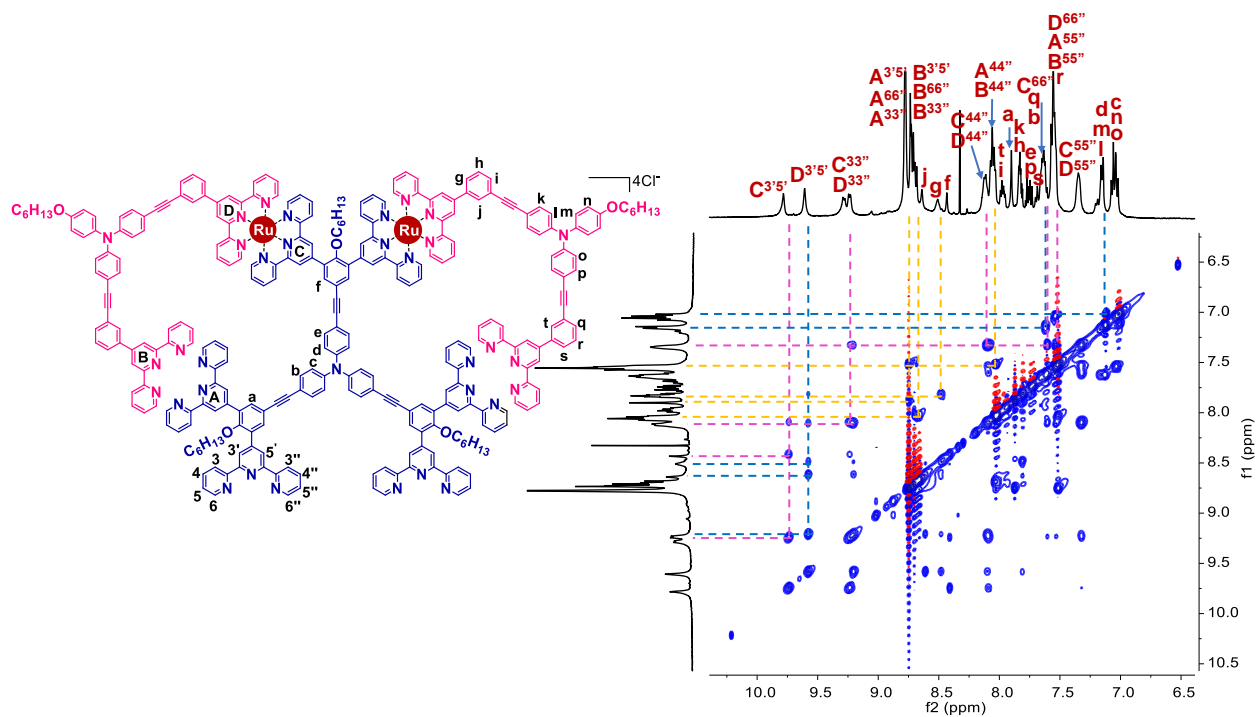

Figure S63. 2D NOESY NMR (500 MHz, DMSO- $d_6$ ) spectrum of ligand LC (aromatic region).

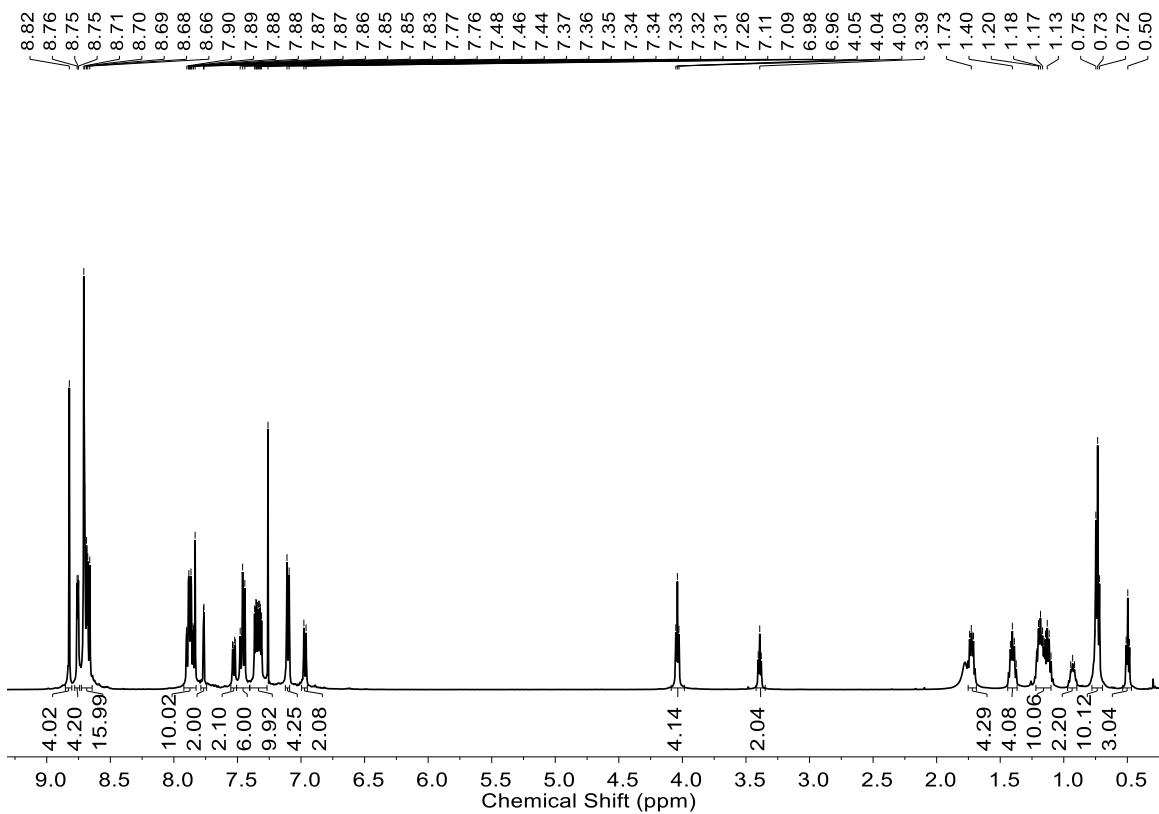

**Figure S64.**  $^1\text{H}$  NMR (500 MHz,  $\text{CDCl}_3$ ) spectrum of ligand LD.

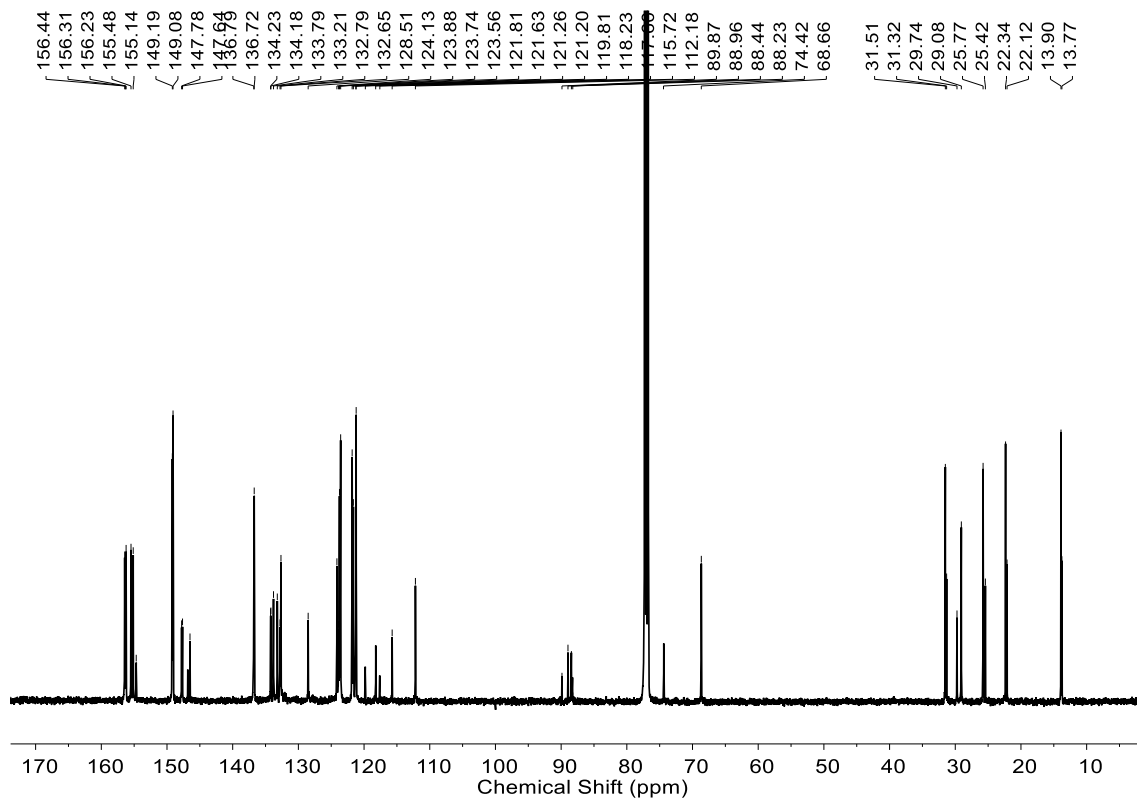

**Figure S65.**  $^{13}\text{C}$  NMR (125 MHz,  $\text{CDCl}_3$ ) spectrum of ligand LD.

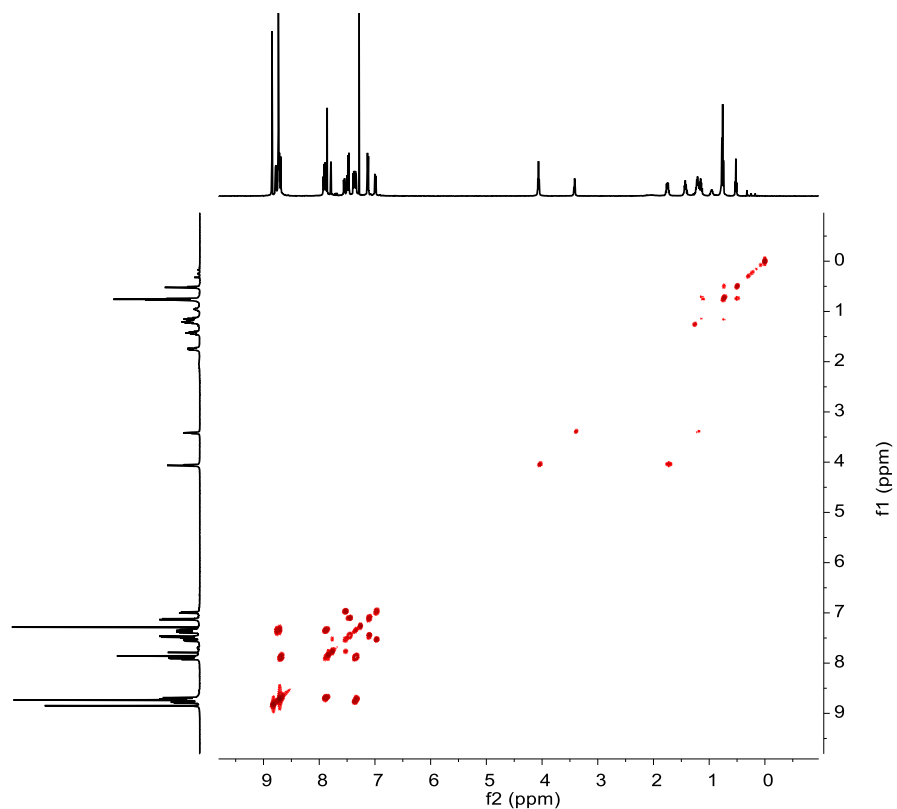

Figure S66. 2D COSY NMR (500 MHz,  $\text{CDCl}_3$ ) spectrum of ligand LD.

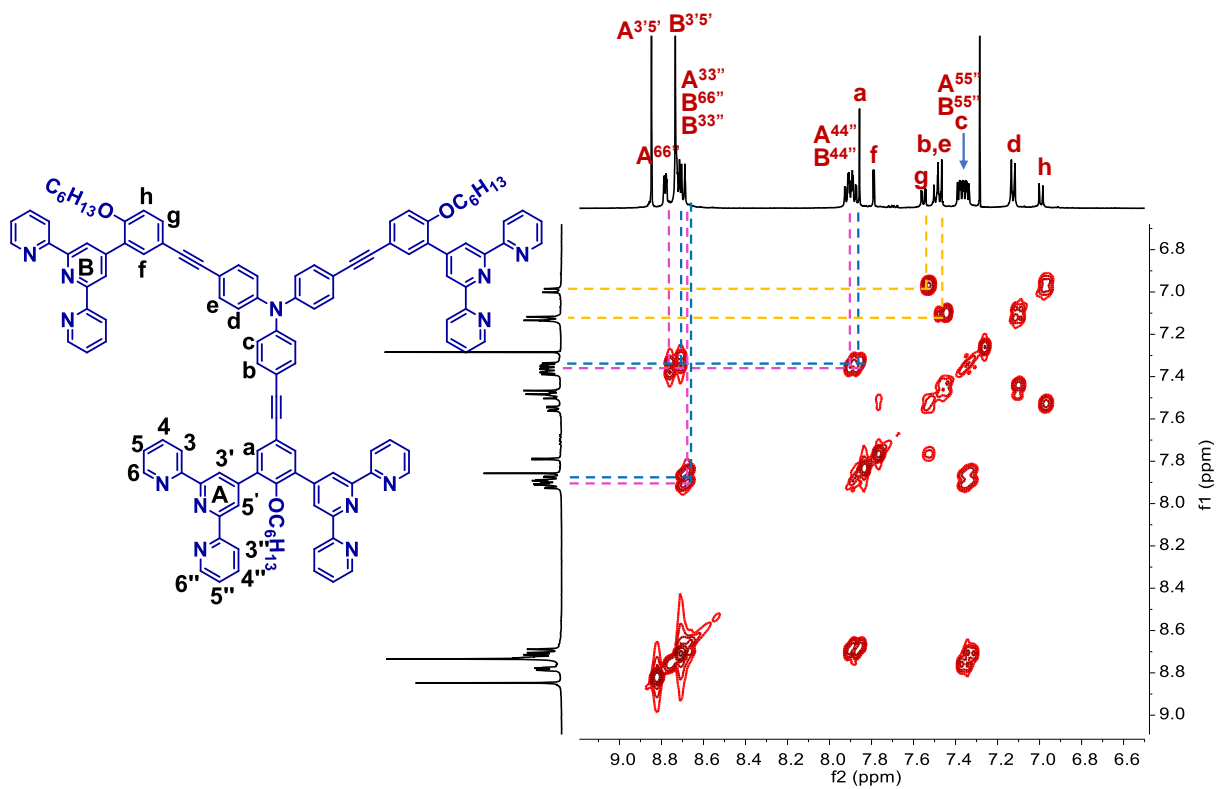

Figure S67. 2D COSY NMR (500 MHz,  $\text{CDCl}_3$ ) spectrum of ligand LD (aromatic region).

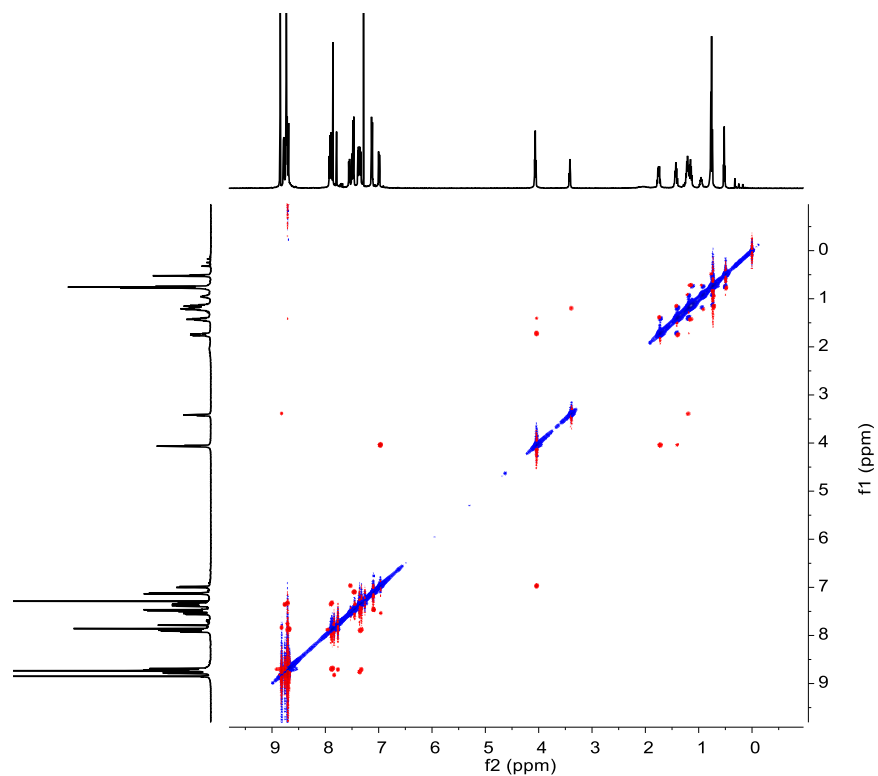

Figure S68. 2D NOESY NMR (500 MHz,  $\text{CDCl}_3$ ) spectrum of ligand LD.

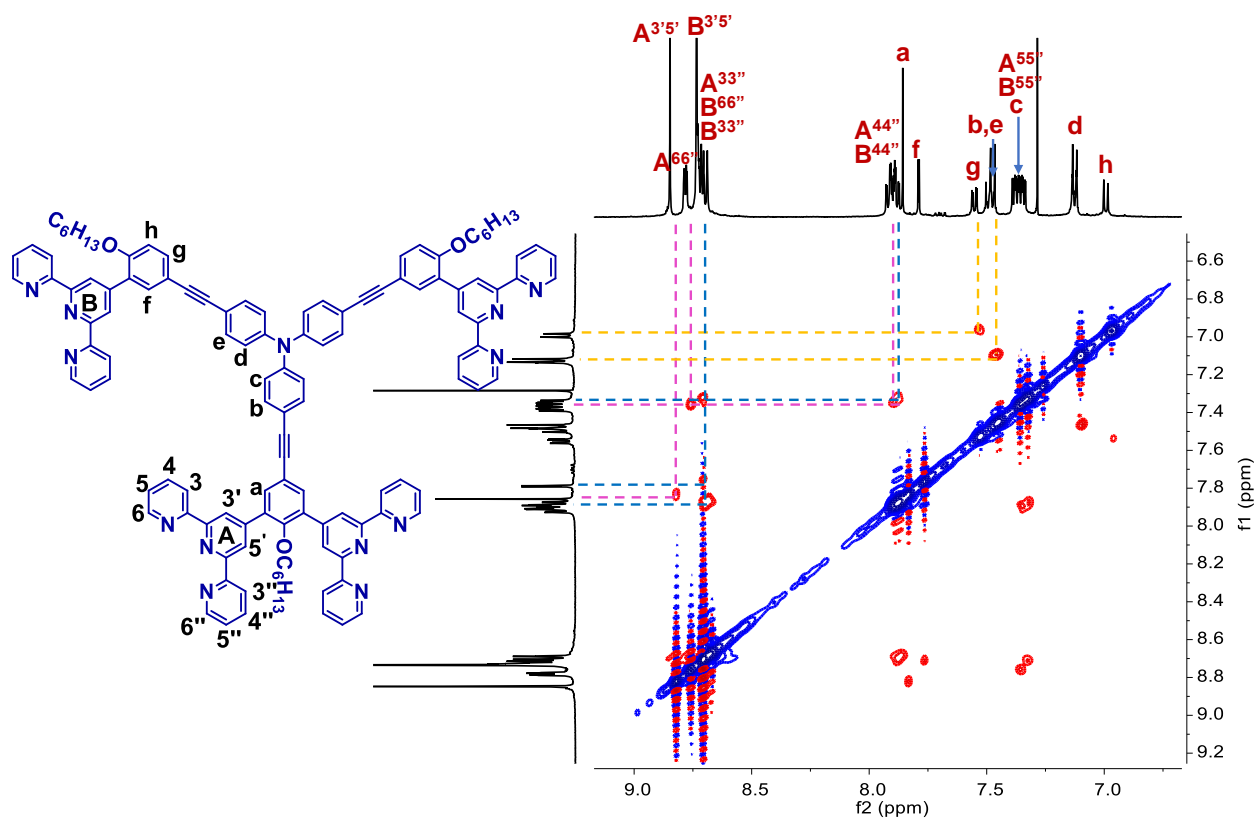

Figure S69. 2D NOESY NMR (500 MHz,  $\text{CDCl}_3$ ) spectrum of ligand LD (aromatic region).

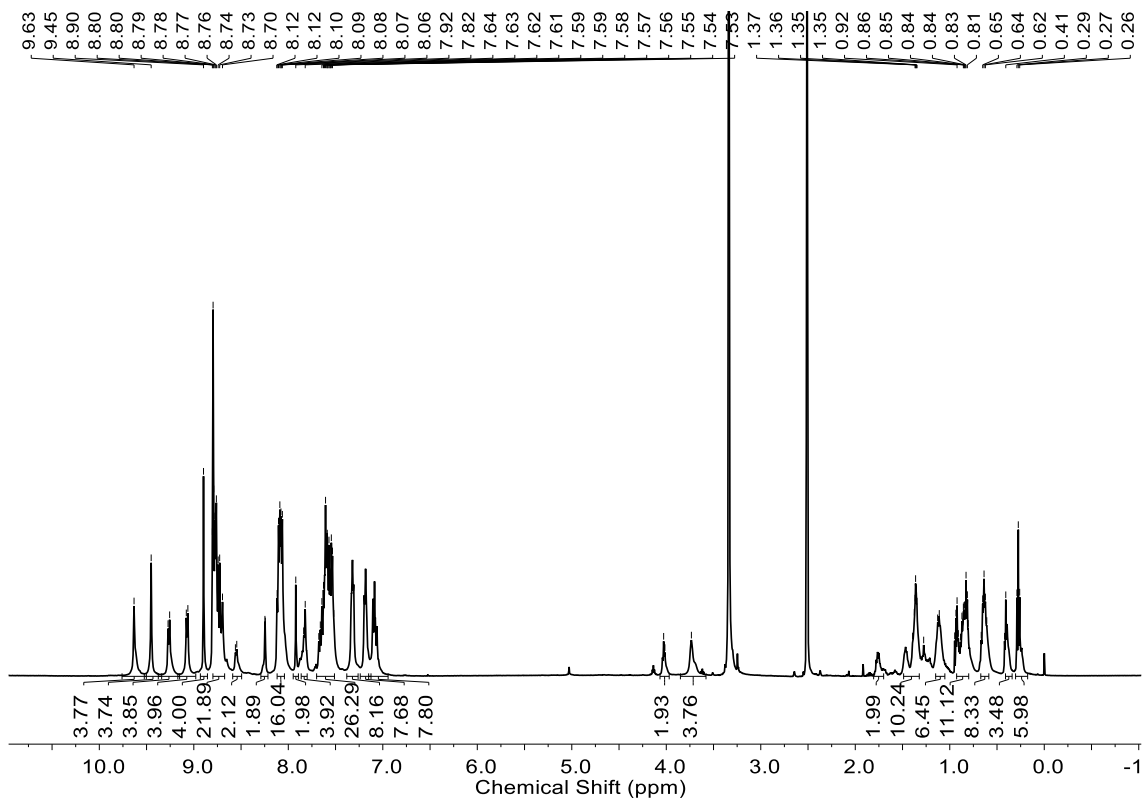

**Figure S70.**  $^1\text{H}$  NMR (500 MHz,  $\text{DMSO-}d_6$ ) spectrum of ligand **LE**.

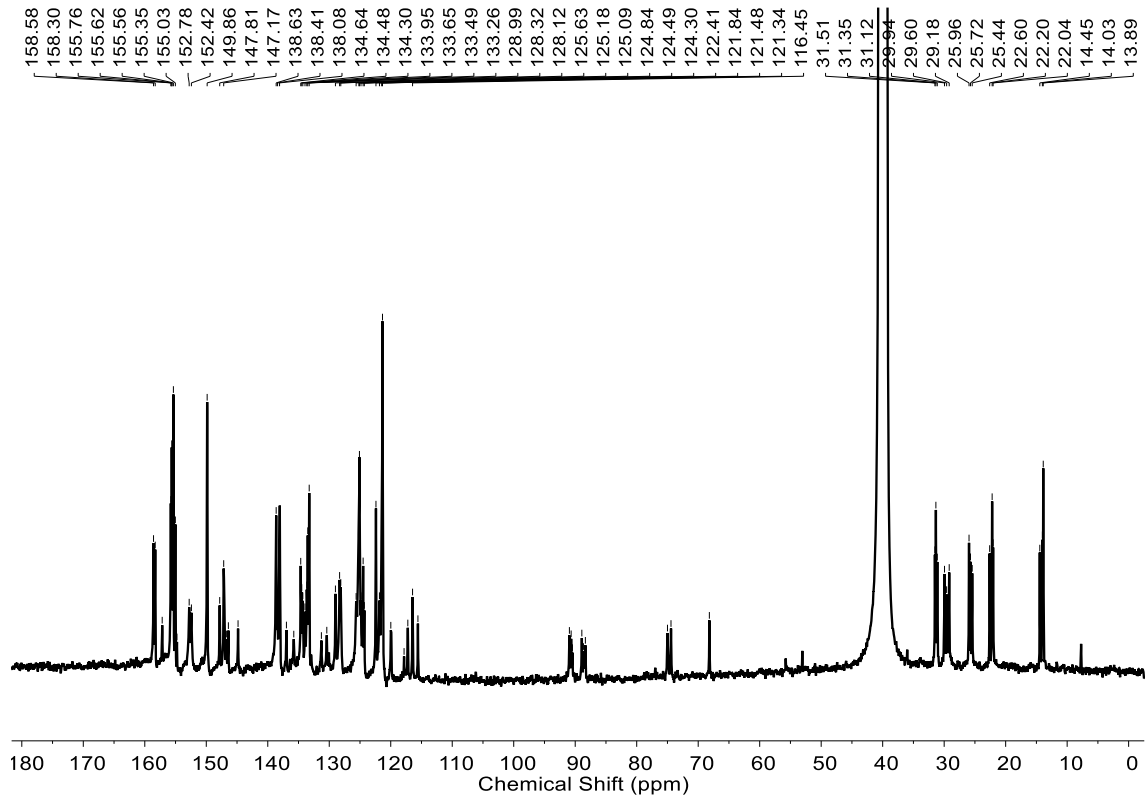

**Figure S71.**  $^{13}\text{C}$  NMR (100 MHz,  $\text{DMSO-}d_6$ ) spectrum of ligand **LE**.

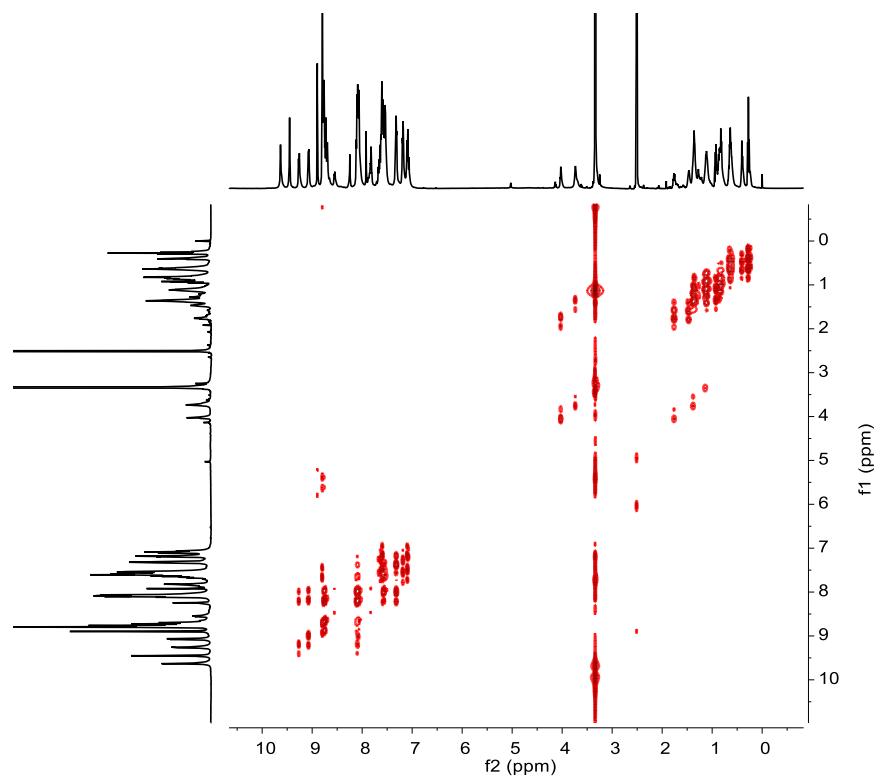

Figure S72. 2D COSY NMR (500 MHz, DMSO-*d*<sub>6</sub>) spectrum of ligand LE.

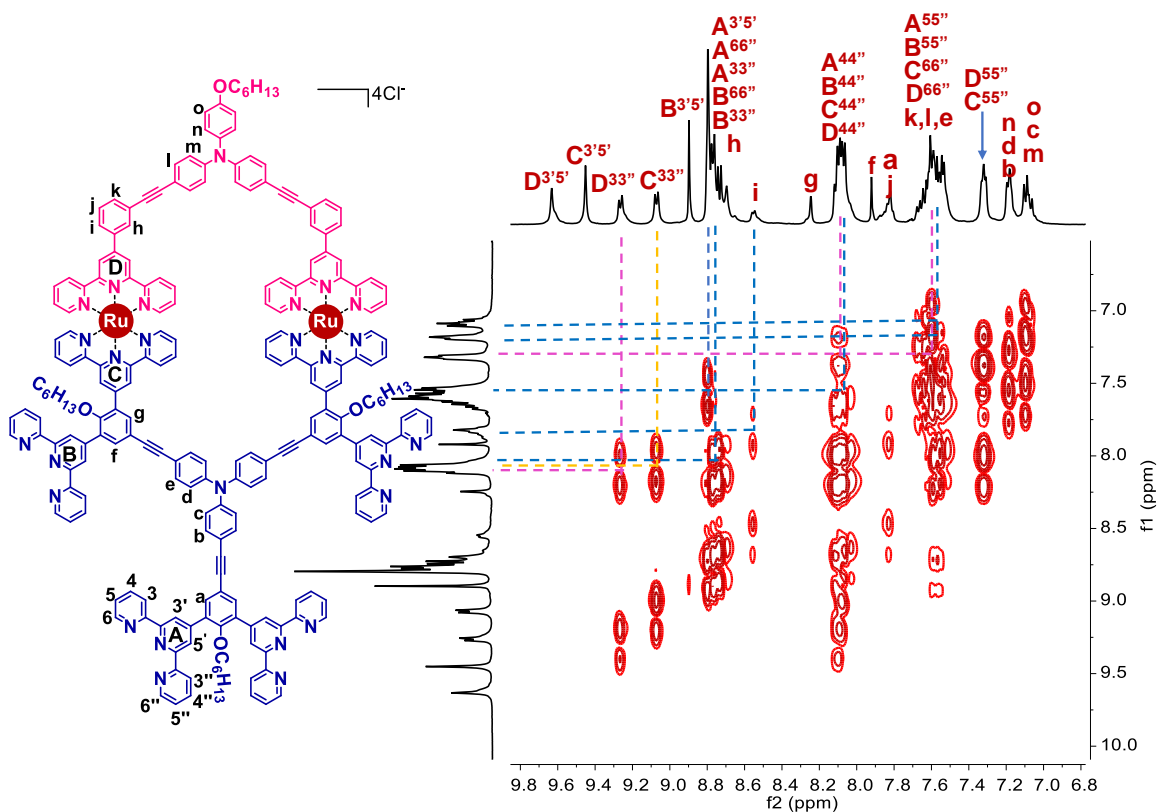

Figure S73. 2D COSY NMR (500 MHz, DMSO-*d*<sub>6</sub>) spectrum of ligand LE (aromatic region).

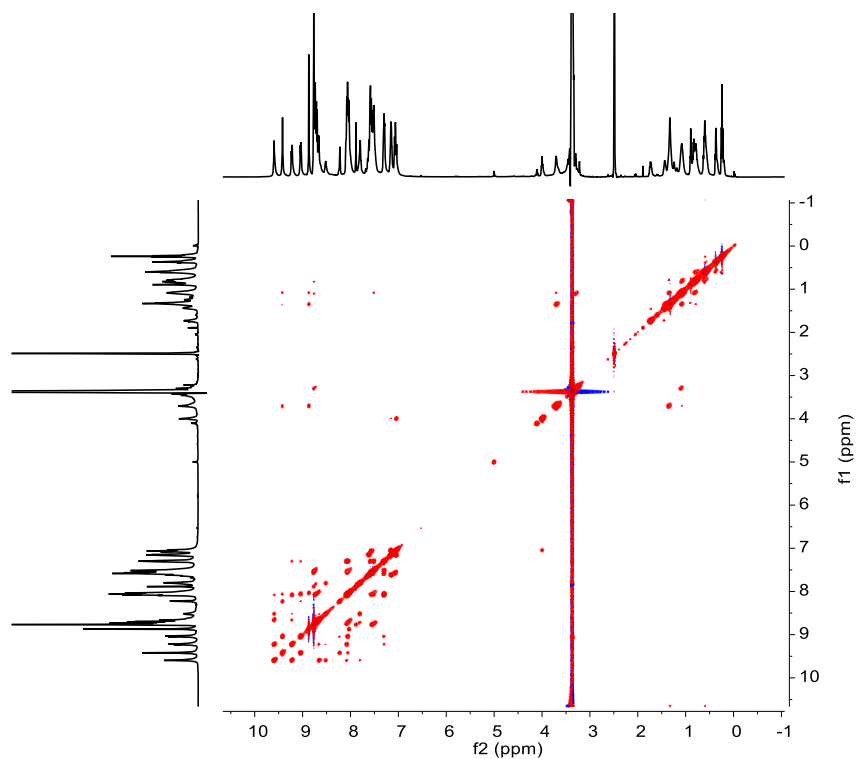

Figure S74. 2D NOESY NMR (500 MHz, DMSO-*d*<sub>6</sub>) spectrum of ligand LE.

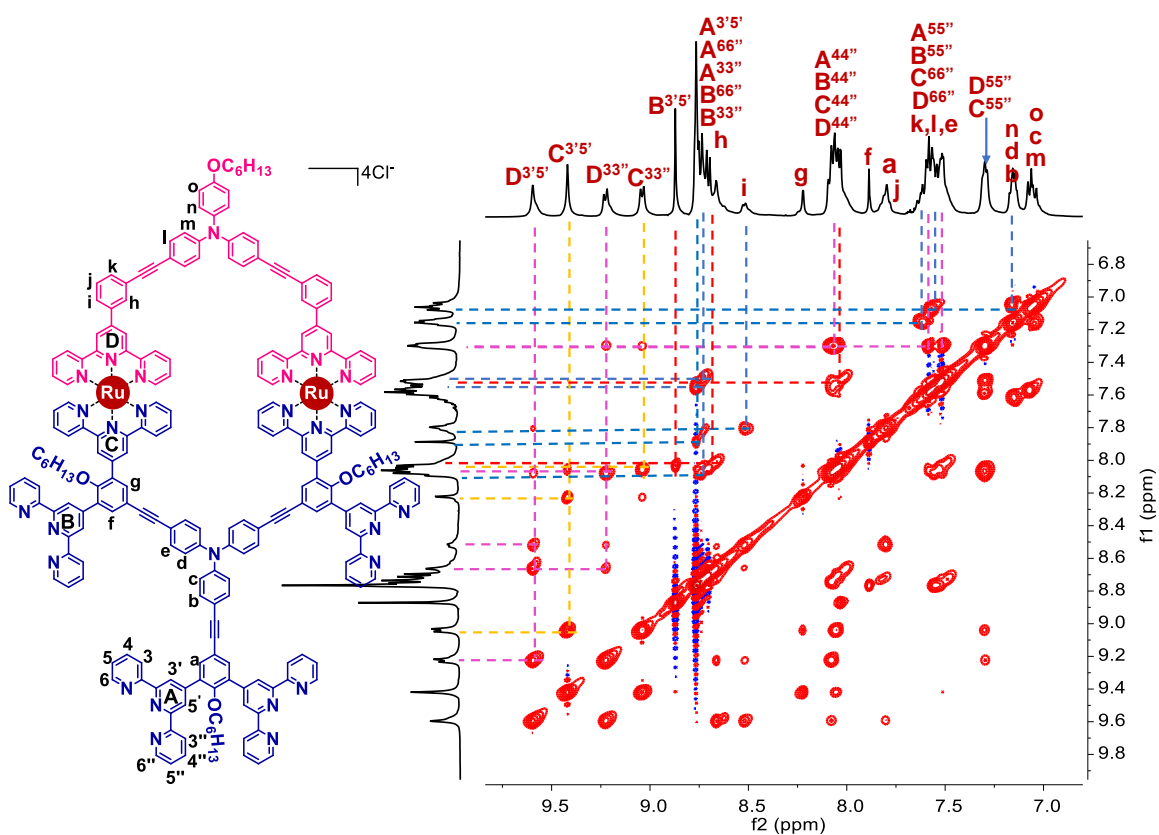

Figure S75. 2D NOESY NMR (500 MHz, DMSO-*d*<sub>6</sub>) spectrum of ligand LE (aromatic region).

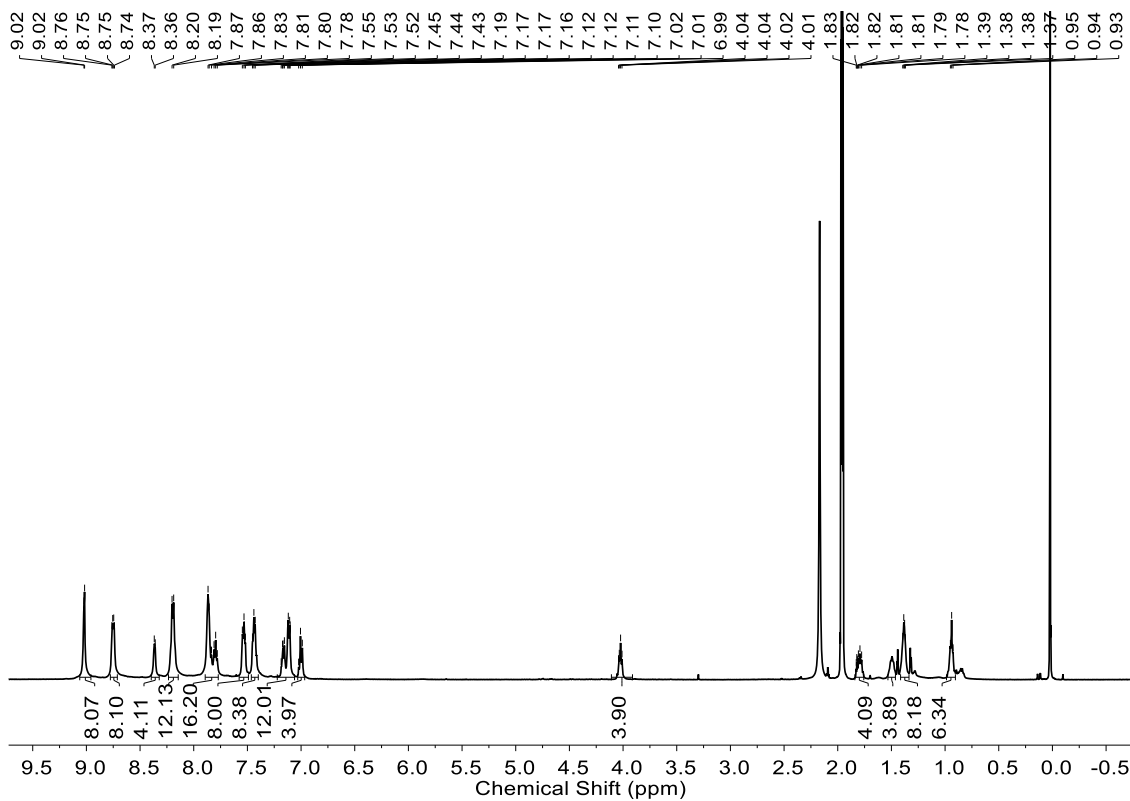

Figure S76.  $^1\text{H}$  NMR (500 MHz,  $\text{CD}_3\text{CN}$ ) spectrum of complex G1.

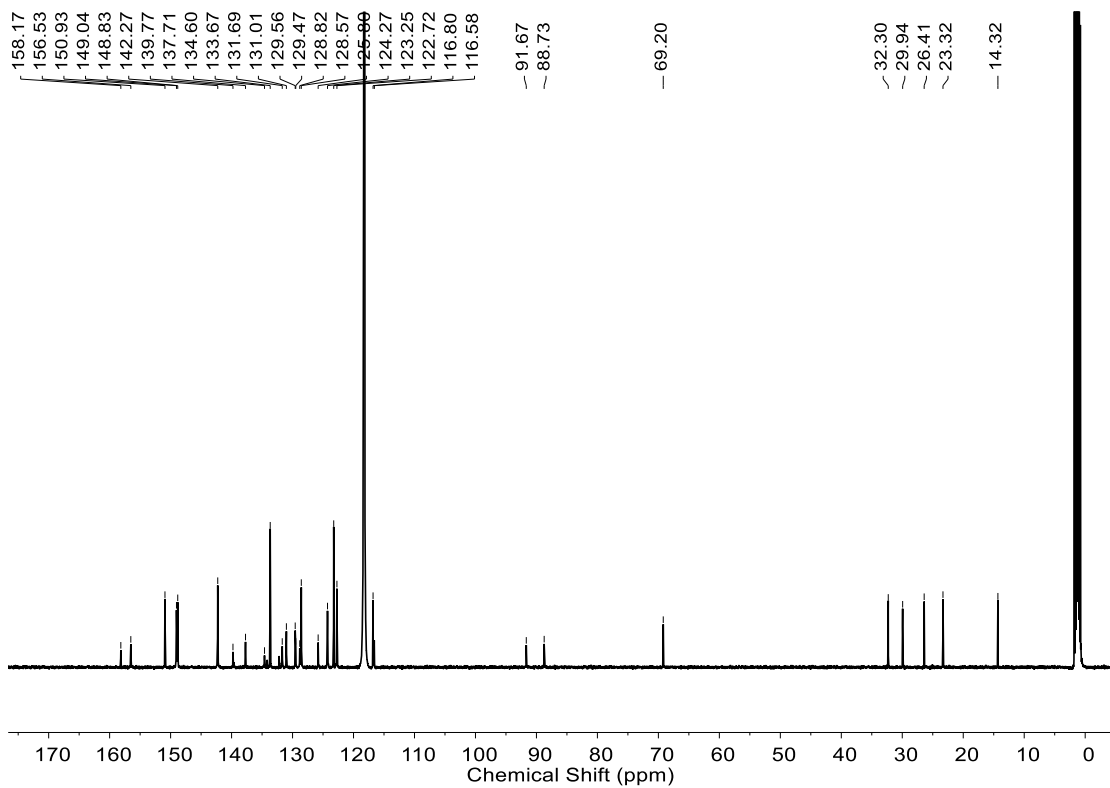

Figure S77.  $^{13}\text{C}$  NMR (125 MHz,  $\text{CD}_3\text{CN}$ ) spectrum of complex G1.



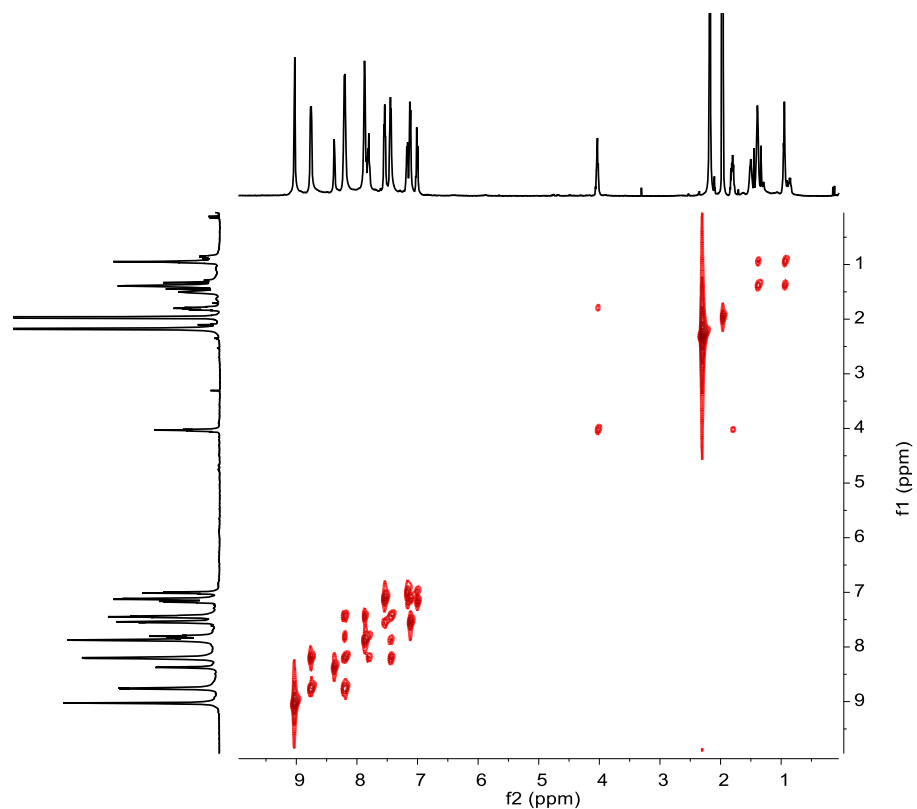

Figure S78. 2D COSY NMR (500 MHz, CD<sub>3</sub>CN) spectrum of complex **G1**.

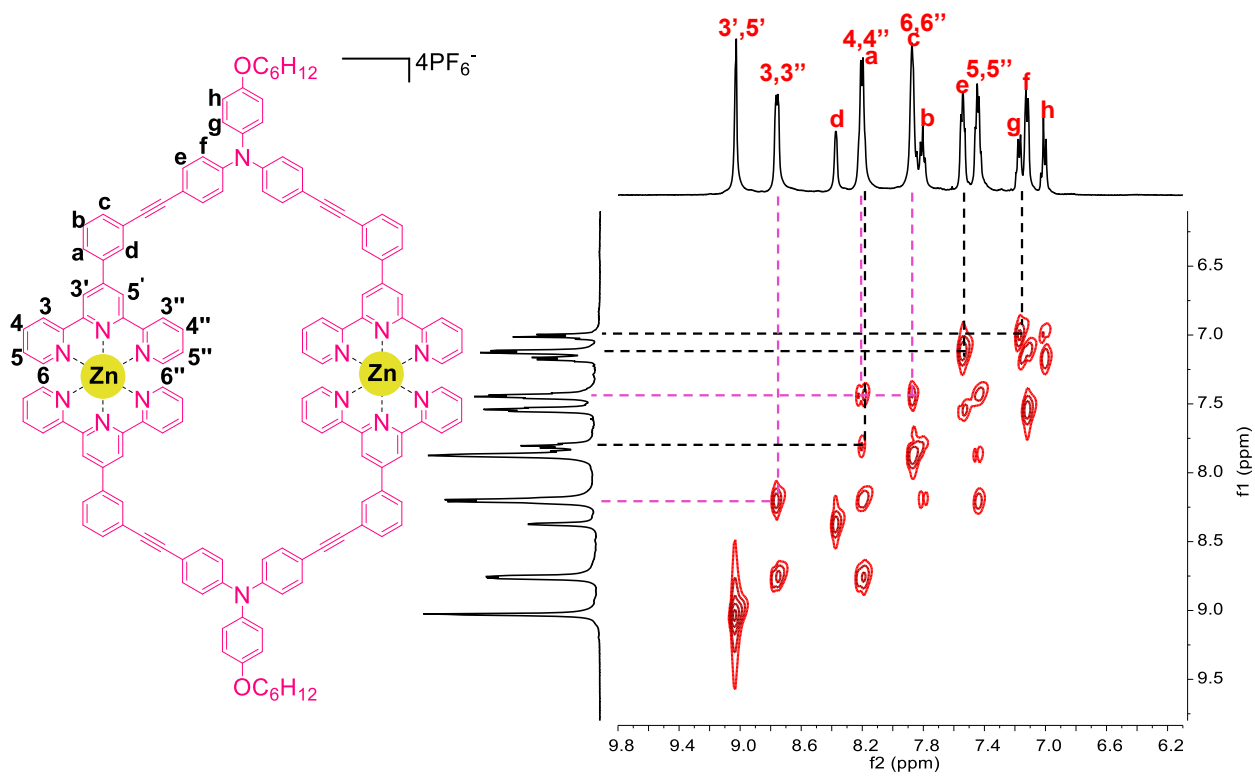

Figure S79. 2D COSY NMR (500 MHz, CD<sub>3</sub>CN) spectrum of complex **G1**(aromatic region).

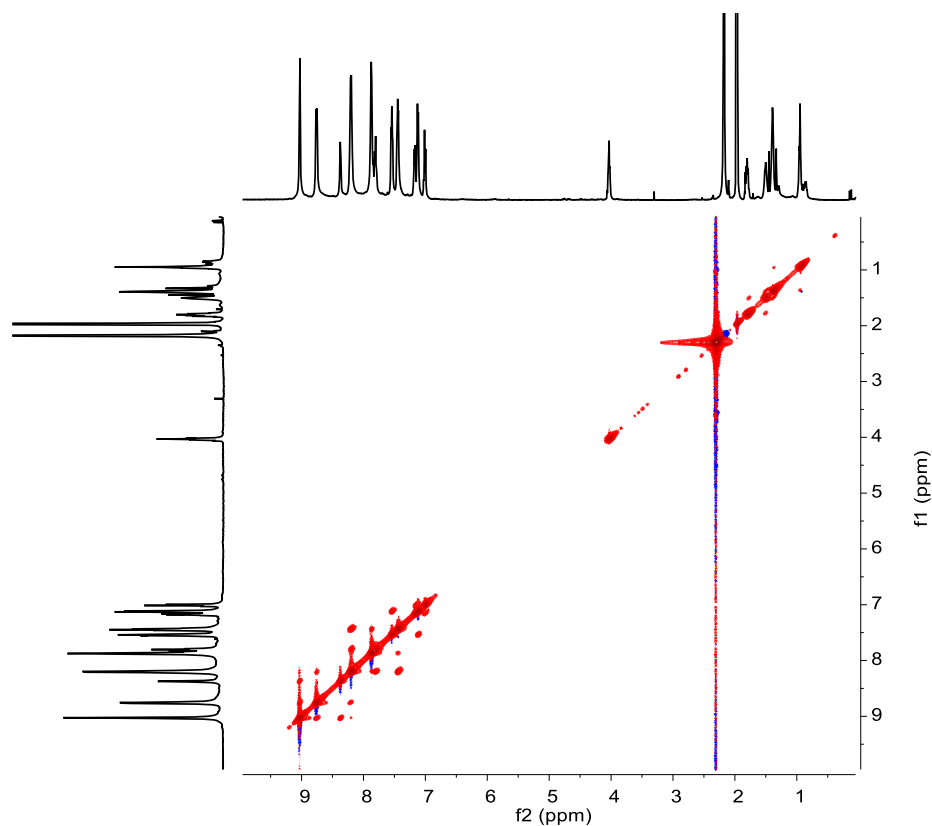

Figure S80. 2D NOESY NMR (500 MHz, CD<sub>3</sub>CN) spectrum of complex **G1**.

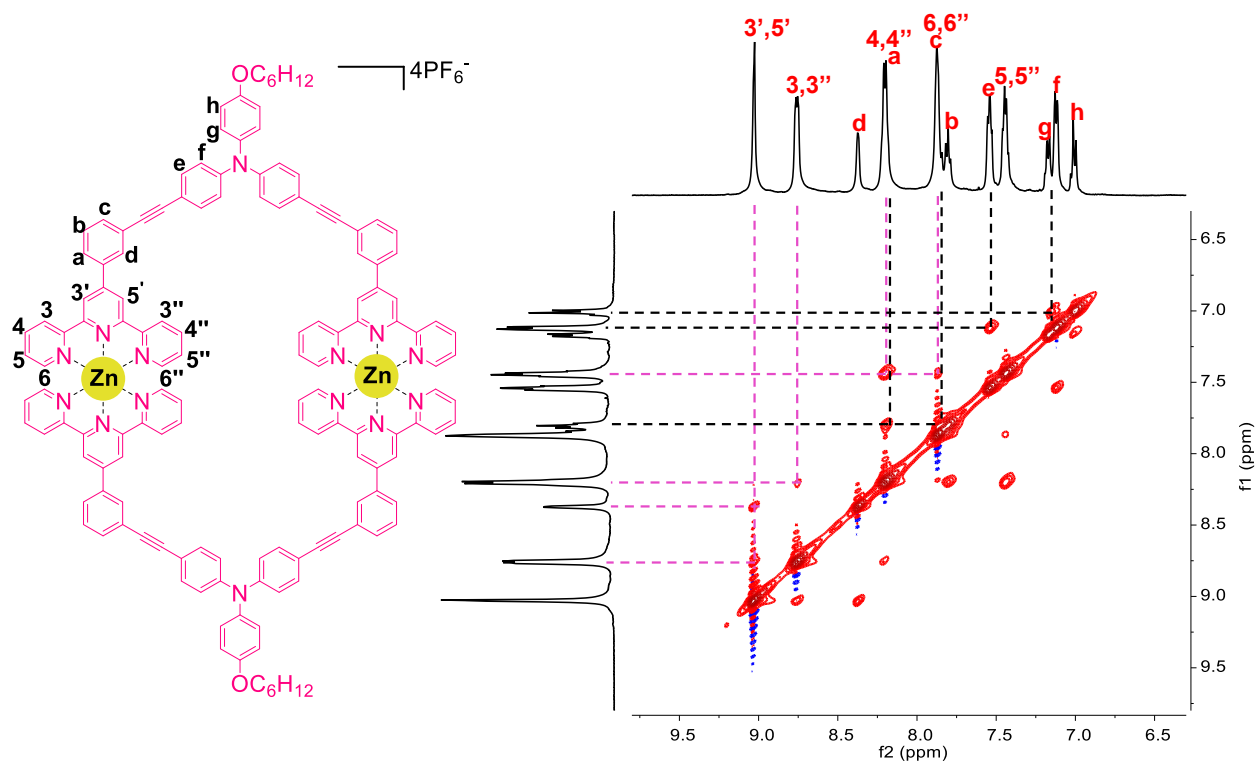

Figure S81. 2D NOESY NMR (500 MHz, CD<sub>3</sub>CN) spectrum of complex **G1**(aromatic region).

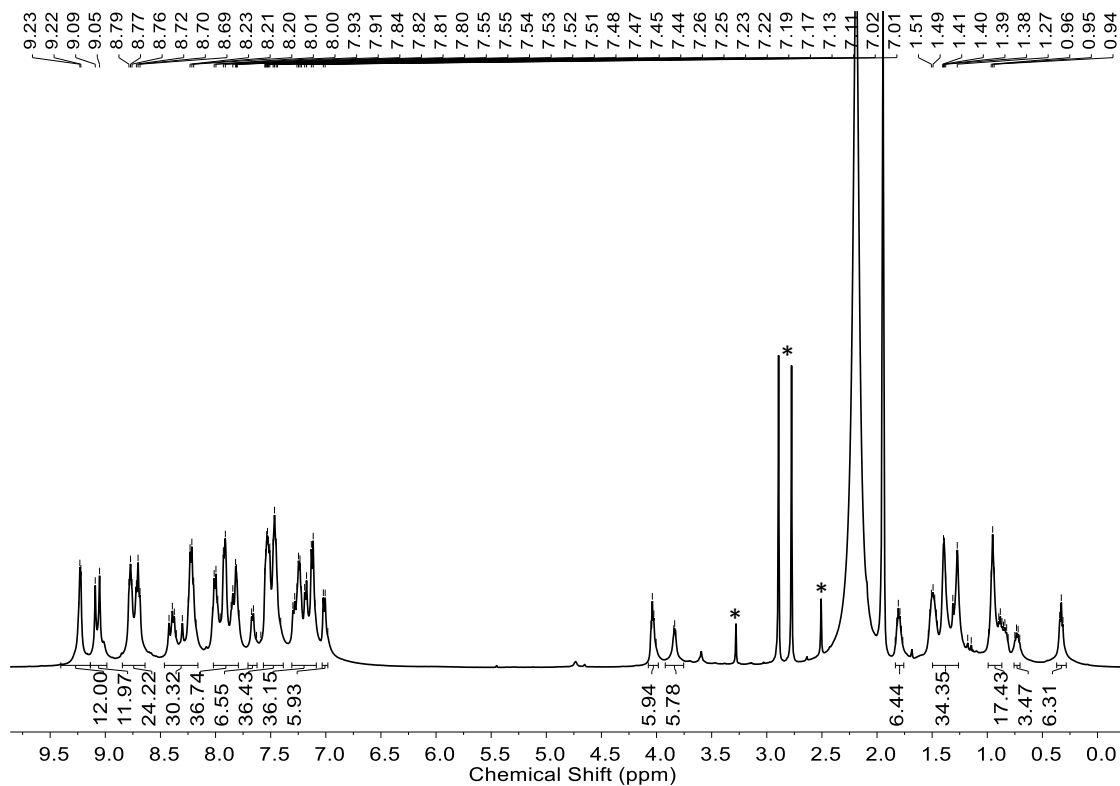

**Figure S82.**  $^1\text{H}$  NMR (500 MHz,  $\text{CD}_3\text{CN}$ ) spectrum of complex **G2** (asterisk represent  $\text{CH}_3\text{OH}$ , DMF, DMSO from left to right).

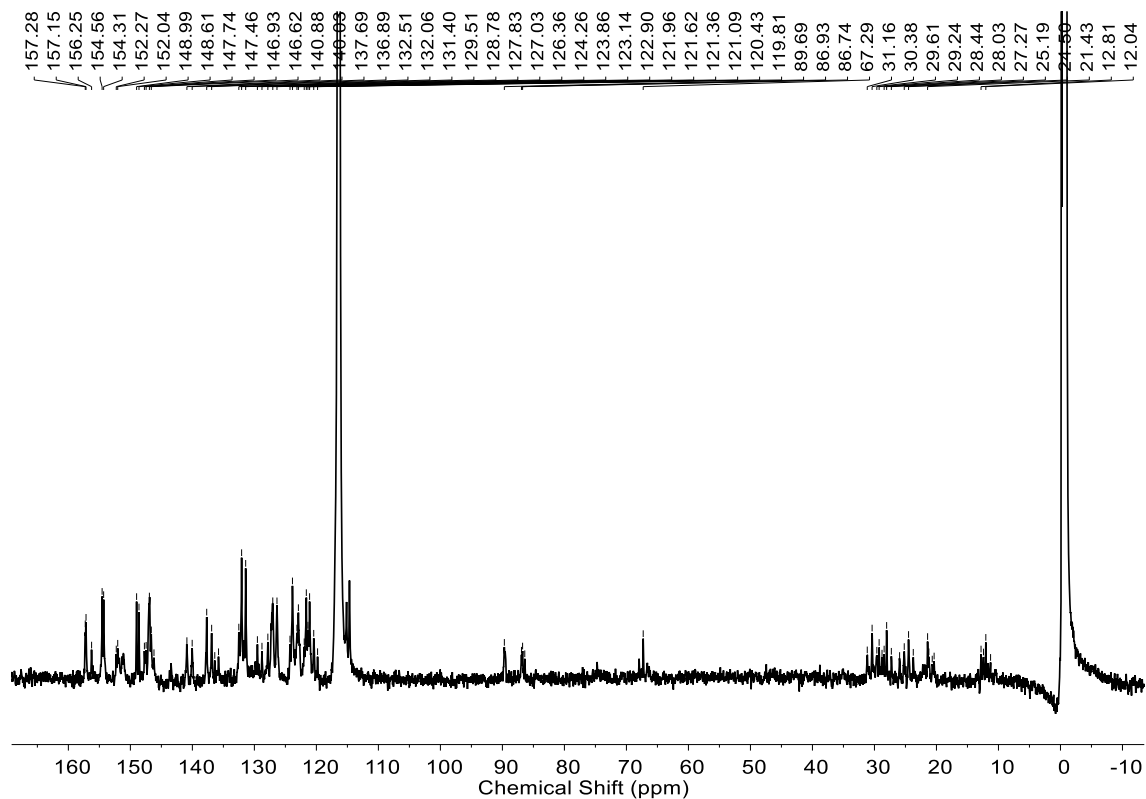

**Figure S83.**  $^{13}\text{C}$  NMR (125 MHz,  $\text{CD}_3\text{CN}$ ) spectrum of complex **G2**.

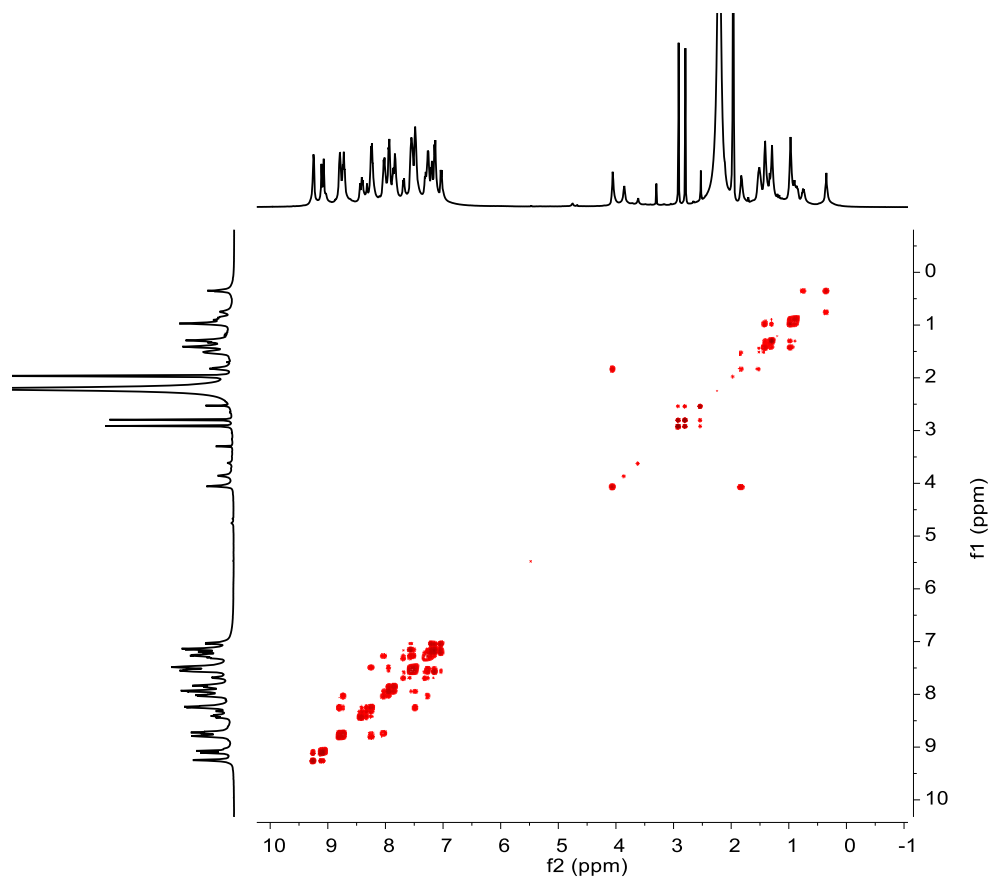

Figure S84. 2D COSY NMR (500 MHz, CD<sub>3</sub>CN) spectrum of complex **G2**.

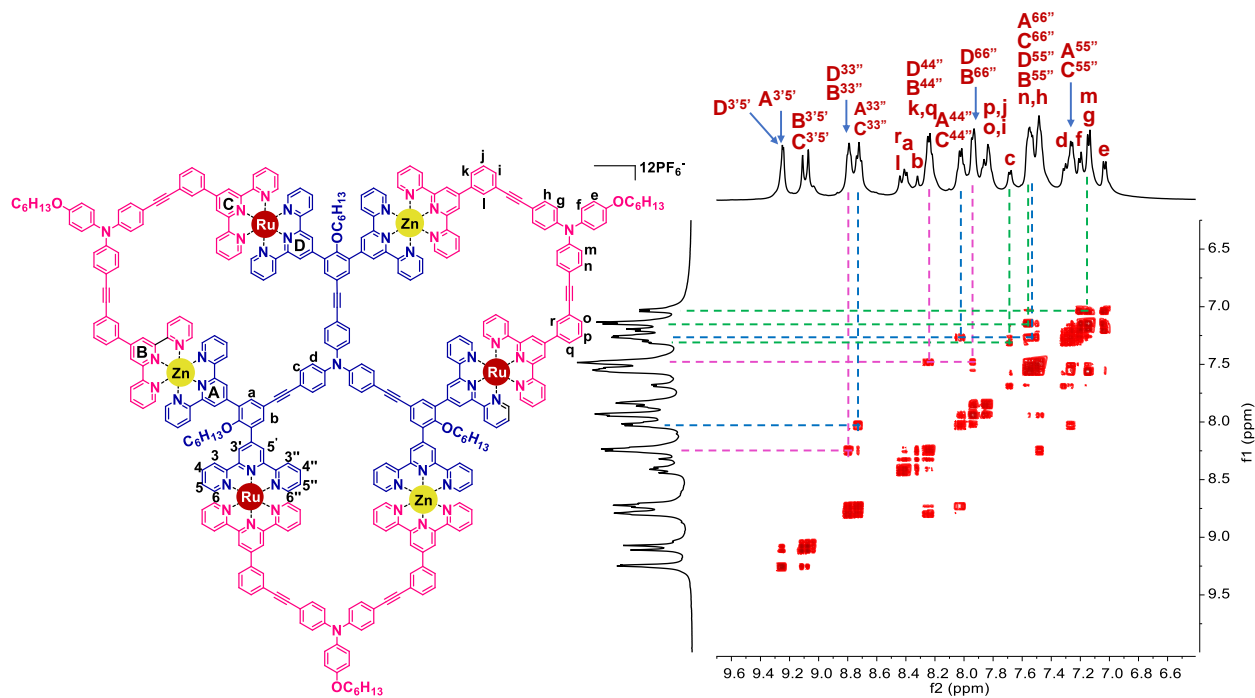

Figure S85. 2D COSY NMR (500 MHz, CD<sub>3</sub>CN) spectrum of complex **G2** (aromatic region).

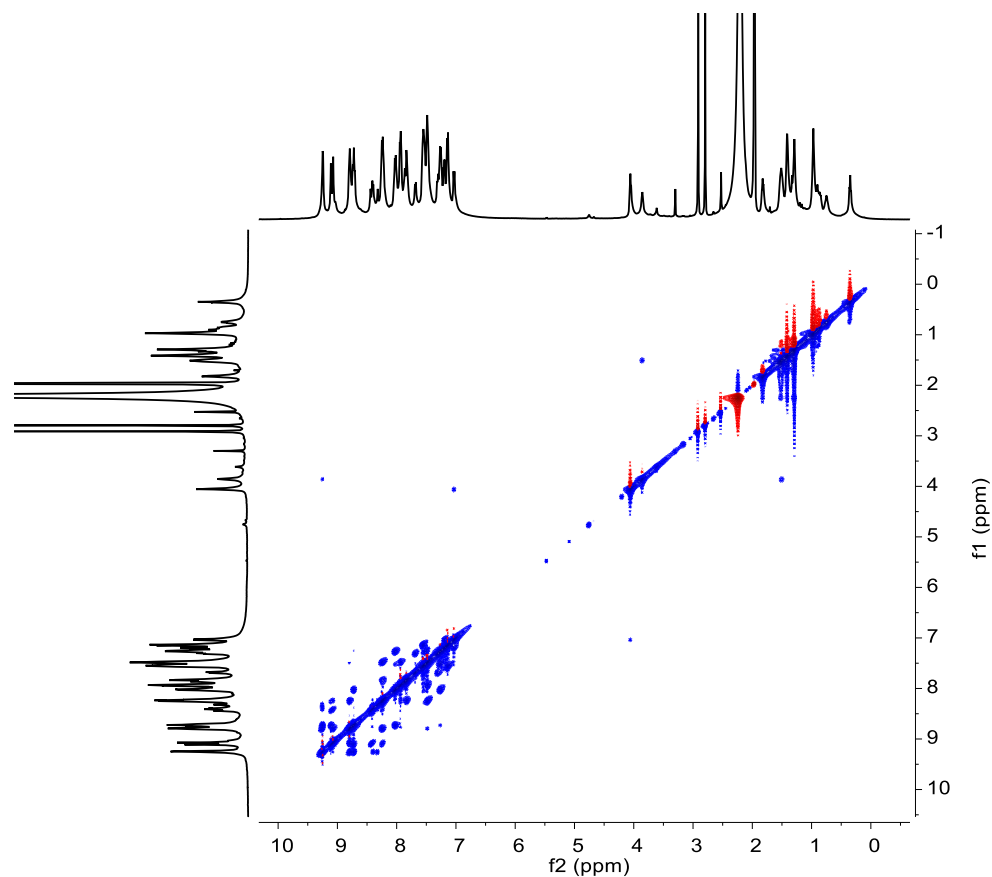

Figure S86. 2D NOESY NMR (500 MHz, CD<sub>3</sub>CN) spectrum of complex **G2**.

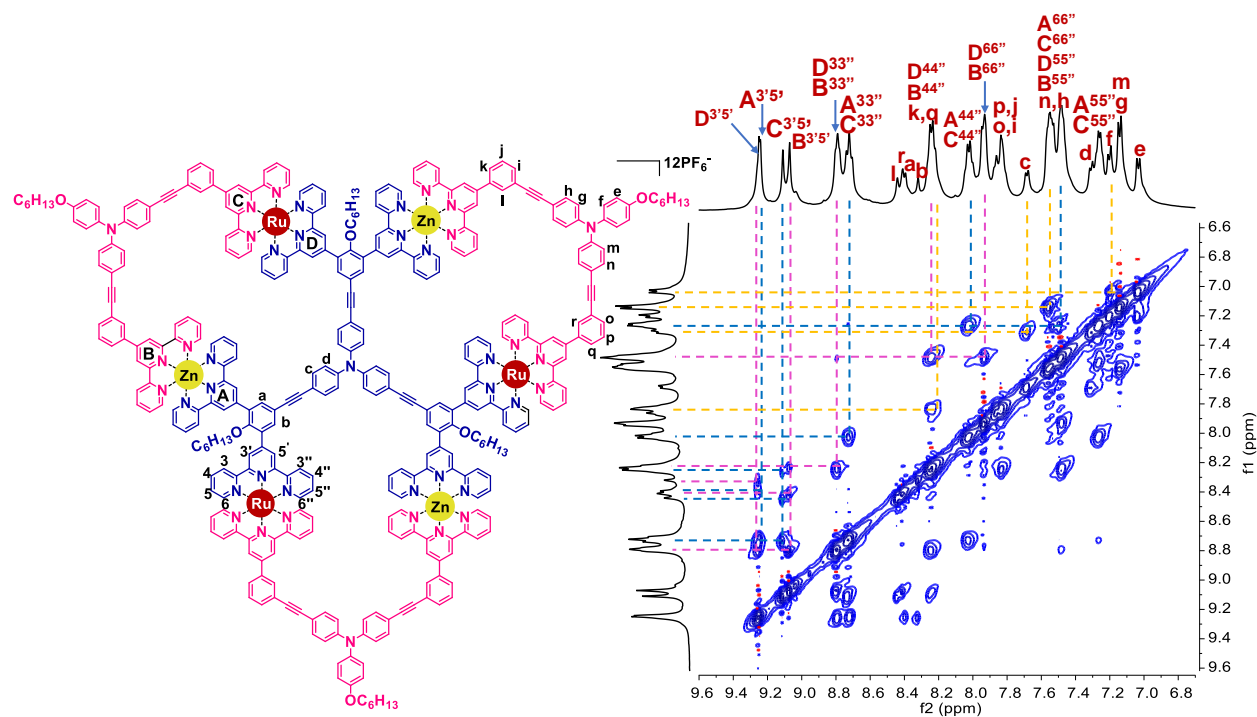

Figure S87. 2D NOESY NMR (500 MHz, CD<sub>3</sub>CN) spectrum of complex **G2** (aromatic region).

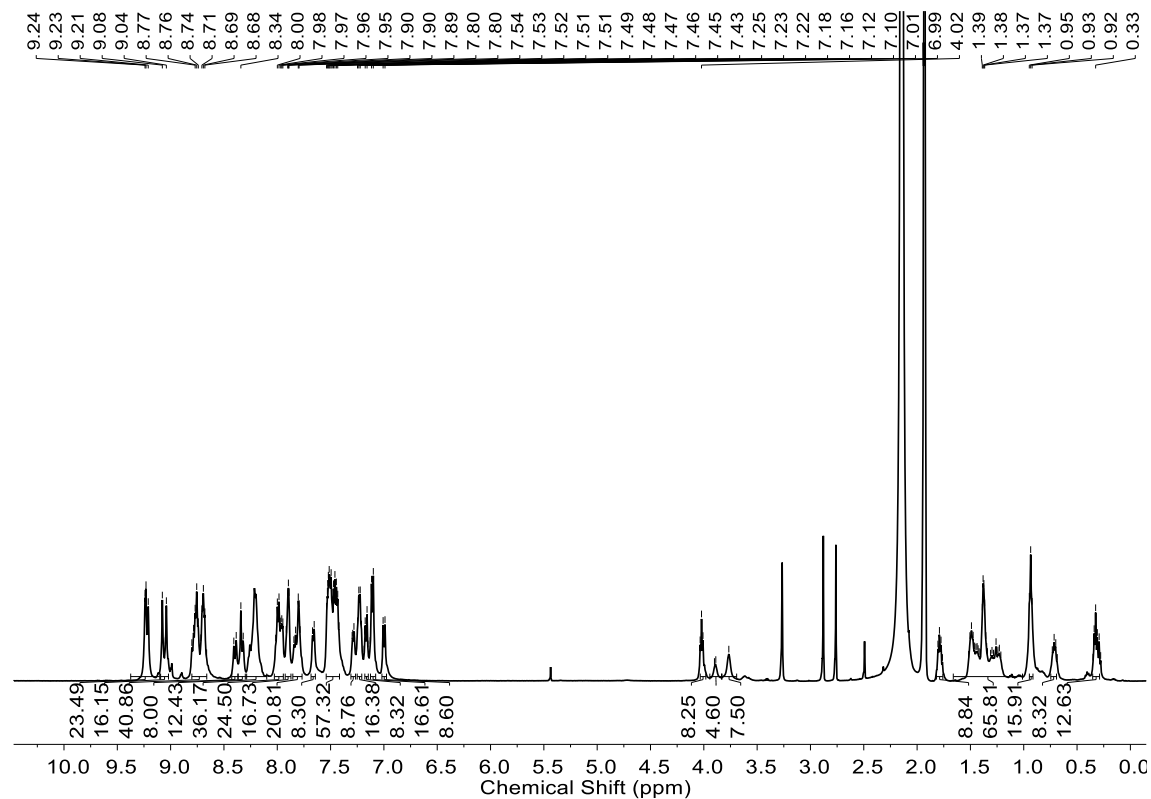

Figure S88.  $^1\text{H}$  NMR (500 MHz,  $\text{CD}_3\text{CN}$ ) spectrum of complex **G3**.

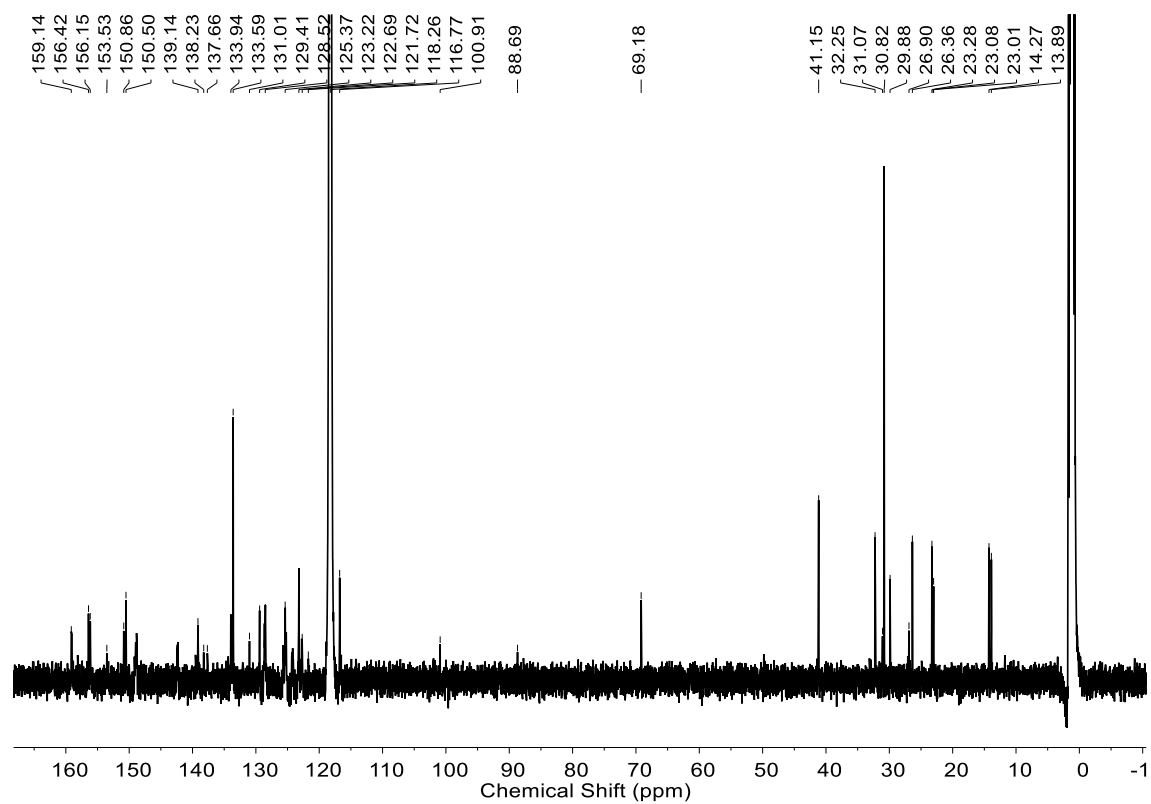

Figure S89.  $^{13}\text{C}$  NMR (125 MHz,  $\text{CD}_3\text{CN}$ ) spectrum of complex **G3**.

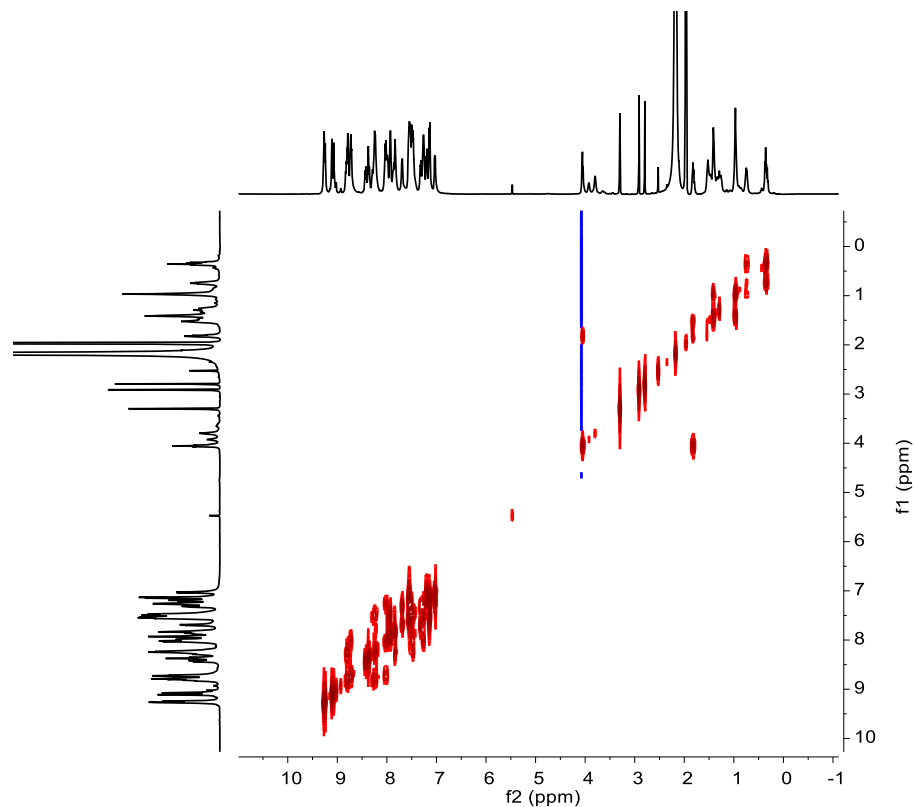

Figure S90. 2D COSY NMR (500 MHz, CD<sub>3</sub>CN) spectrum of complex G3.

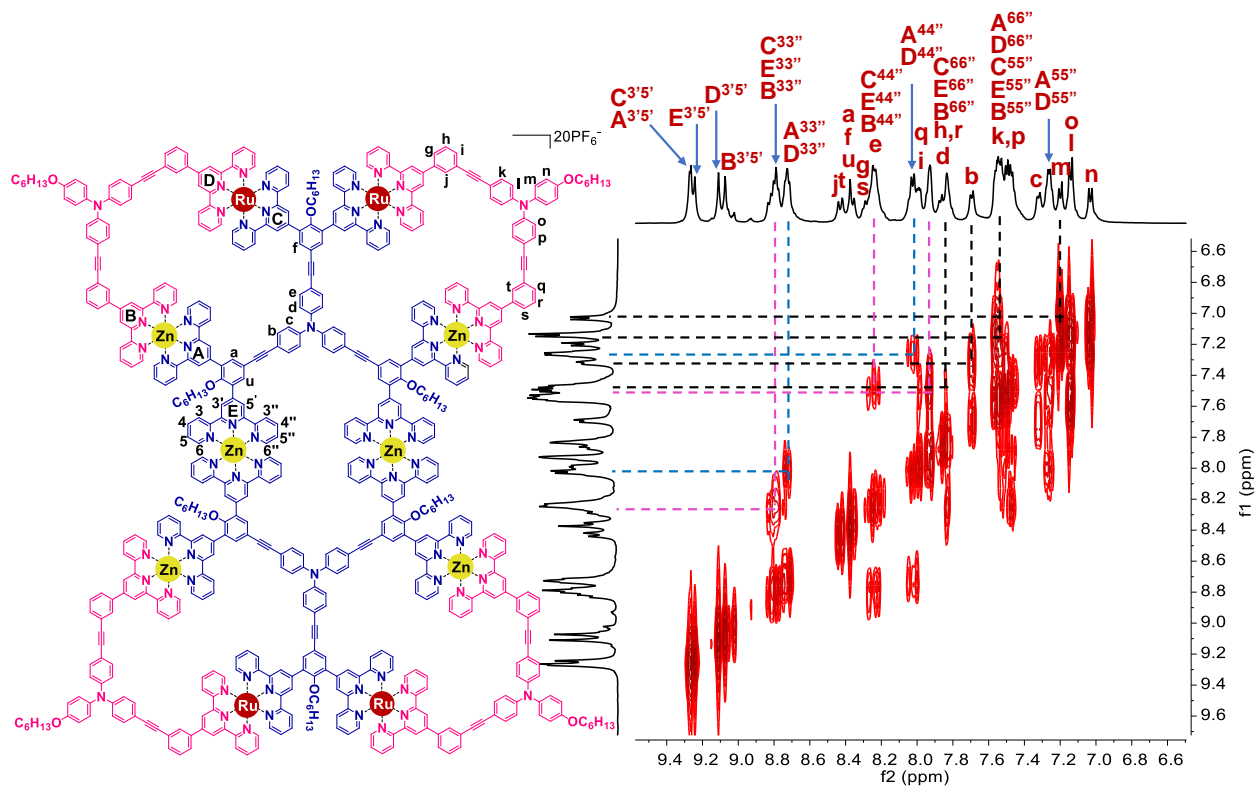

Figure S91. 2D COSY NMR (500 MHz, CD<sub>3</sub>CN) spectrum of complex G3 (aromatic region).

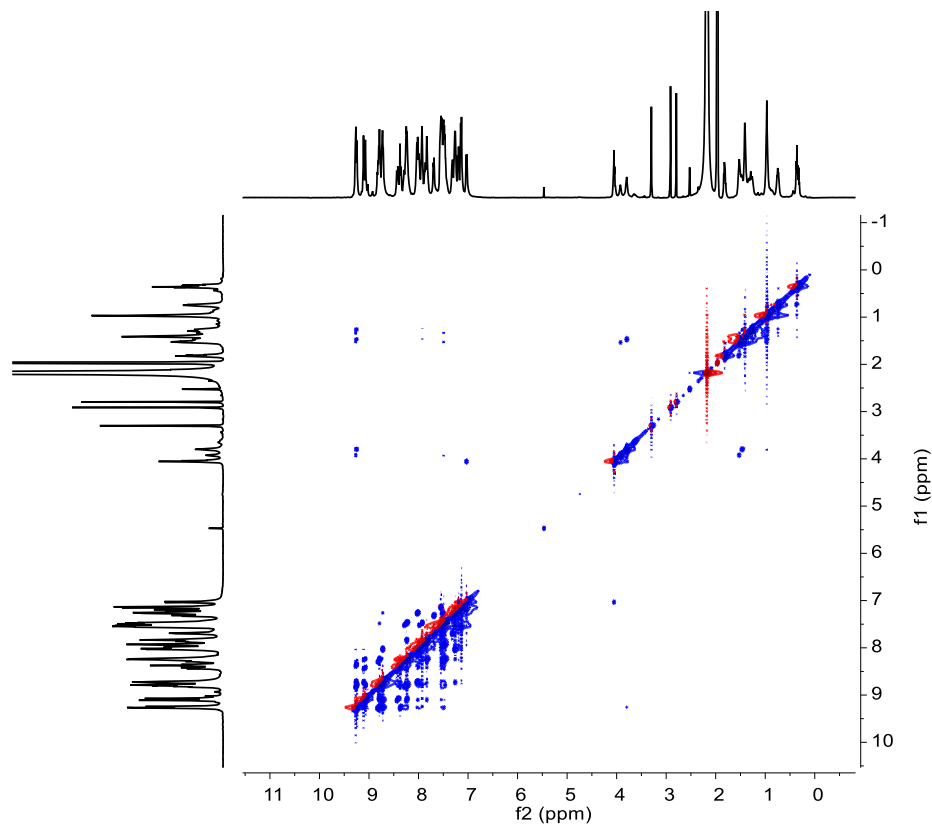

Figure S92. 2D NOESY NMR (500 MHz, CD<sub>3</sub>CN) spectrum of complex **G3** (aromatic region).

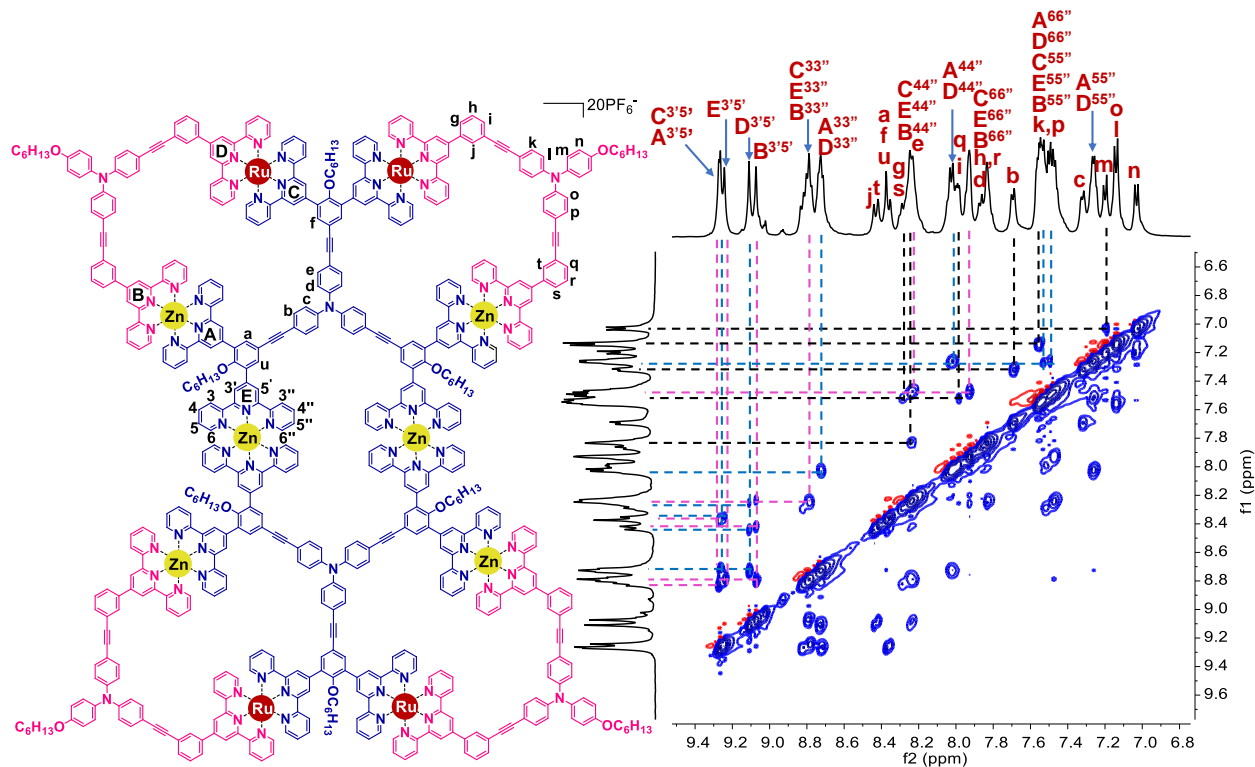

Figure S93. 2D NOESY NMR (500 MHz, CD<sub>3</sub>CN) spectrum of complex **G3** (aromatic region).



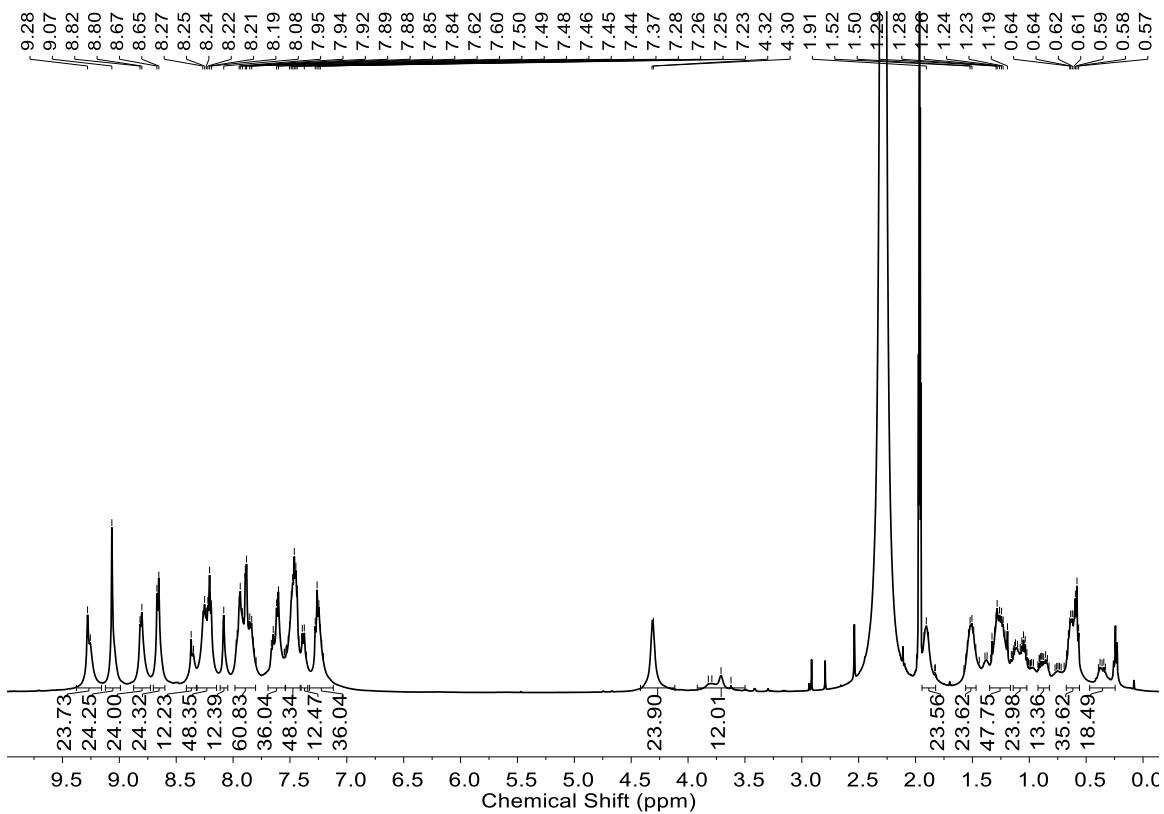

Figure S94.  $^1\text{H}$  NMR (500 MHz,  $\text{CD}_3\text{CN}$ ) spectrum of complex G4.

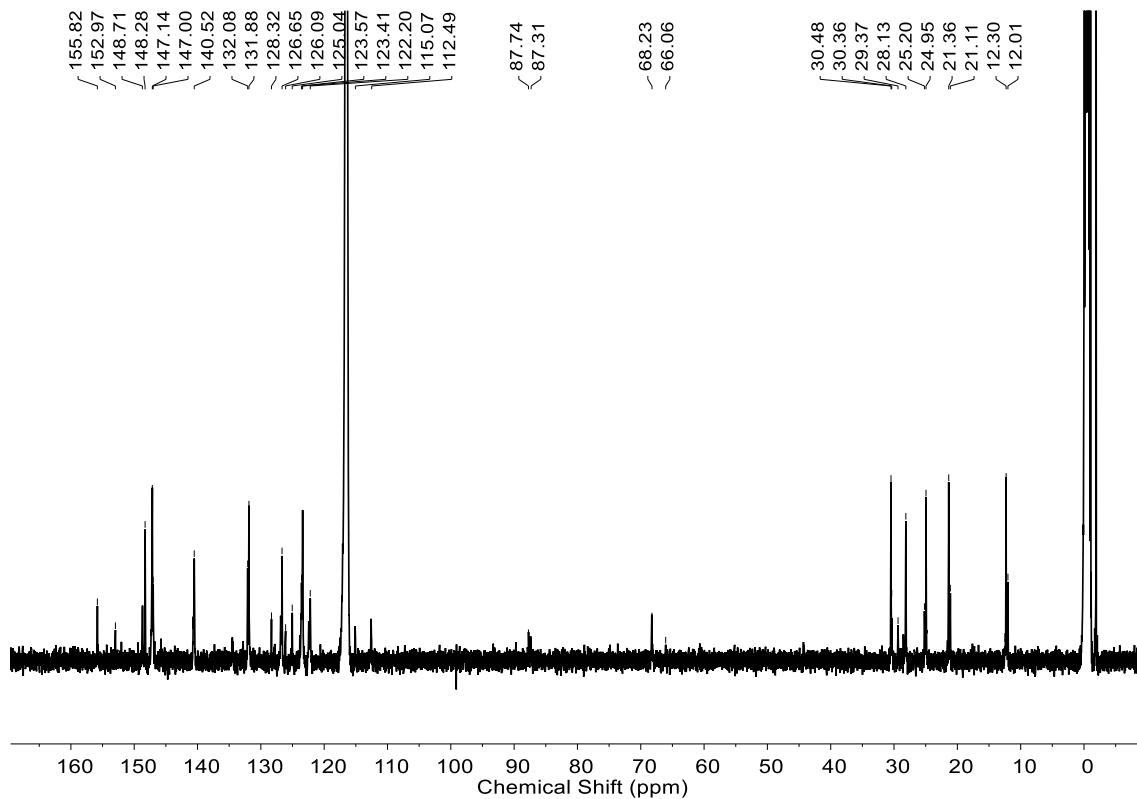

Figure S95.  $^{13}\text{C}$  NMR (125 MHz,  $\text{CD}_3\text{CN}$ ) spectrum of complex G4.

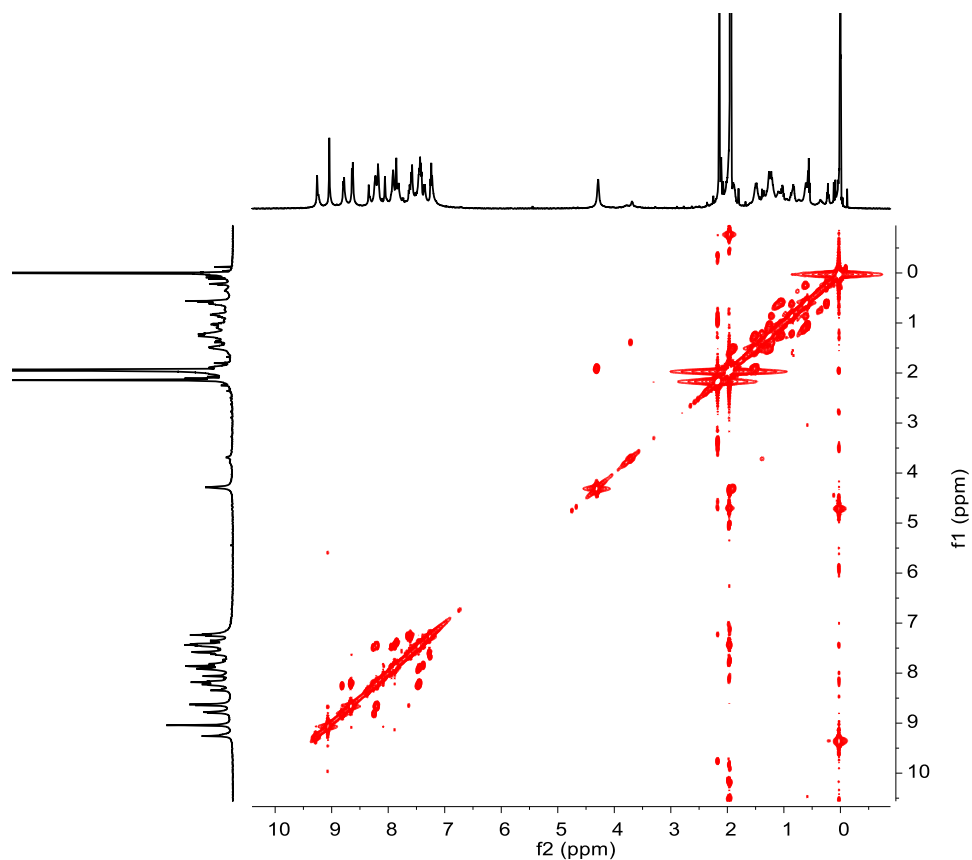

Figure S96. 2D COSY NMR (500 MHz, CD<sub>3</sub>CN) spectrum of complex G4.

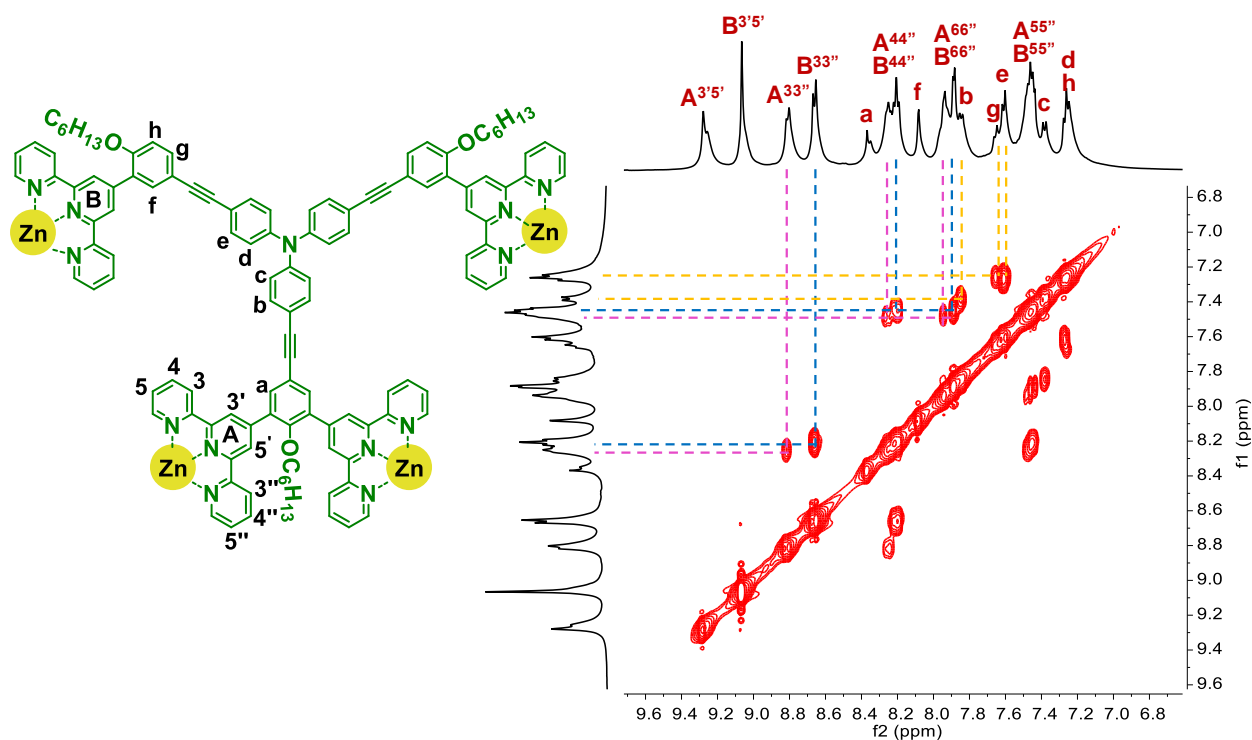

Figure S97. 2D COSY NMR (500 MHz, CD<sub>3</sub>CN) spectrum of complex G4 (aromatic region).

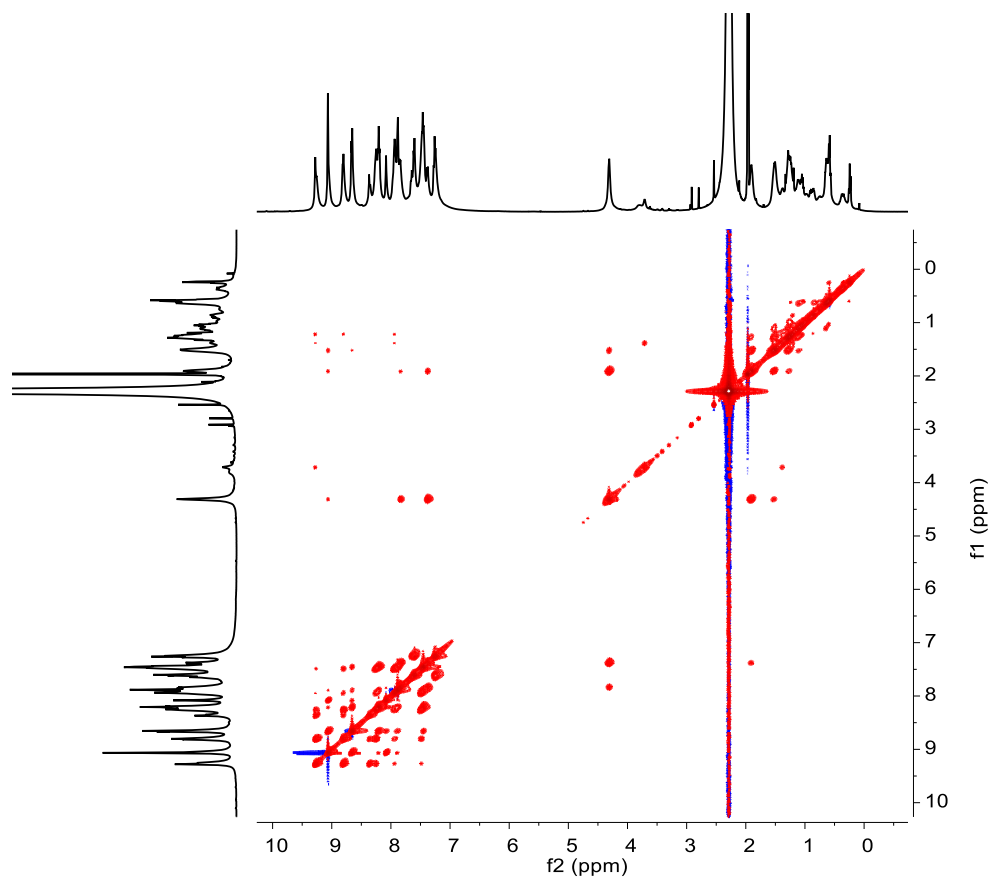

Figure S98. 2D NOESY NMR (500 MHz,  $\text{CD}_3\text{CN}$ ) spectrum of complex **G4**.

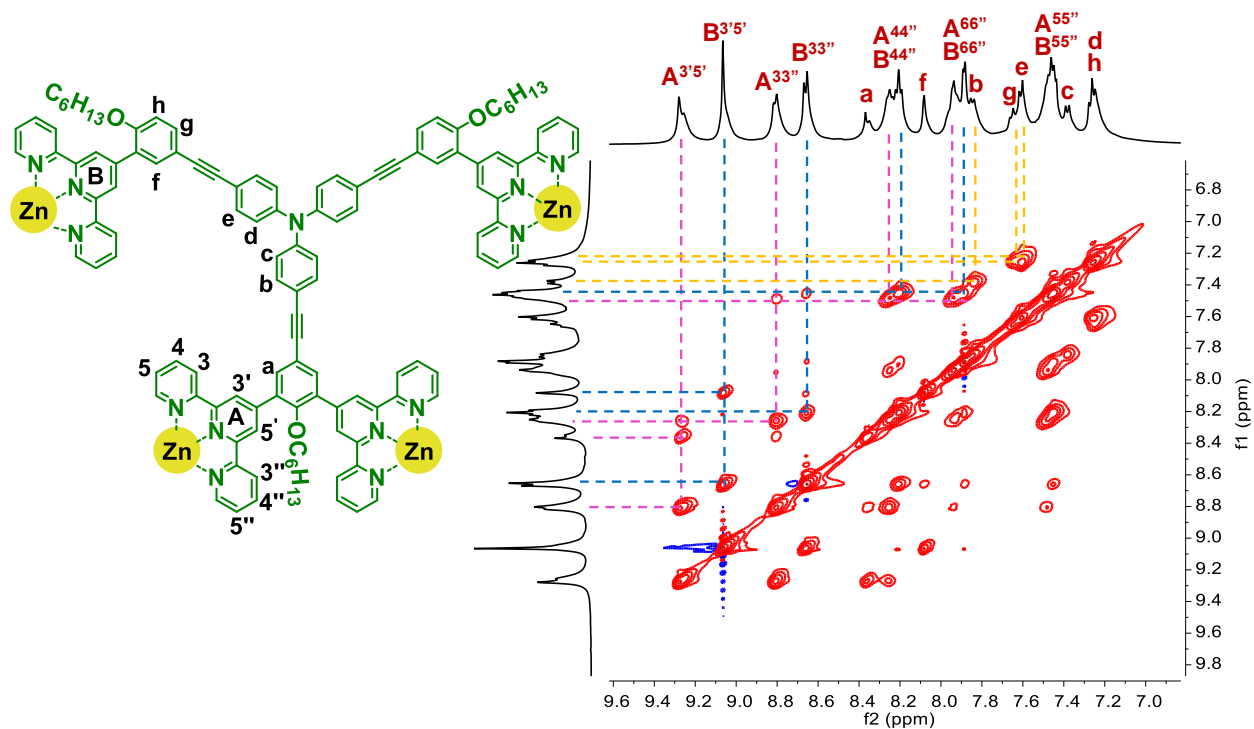

Figure S99. 2D NOESY NMR (500 MHz,  $\text{CD}_3\text{CN}$ ) spectrum of complex **G4** (aromatic region).

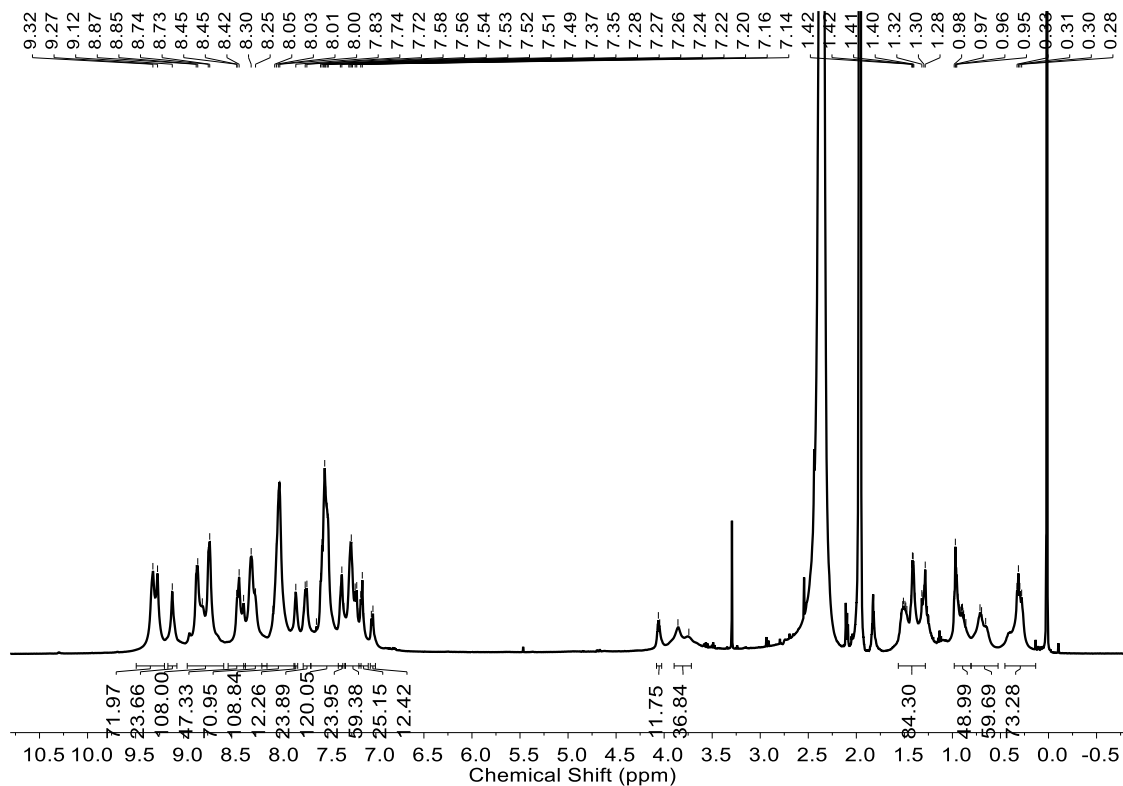

**Figure S100.**  $^1\text{H}$  NMR (500 MHz,  $\text{CD}_3\text{CN}$ ) spectrum of complex **G5**.

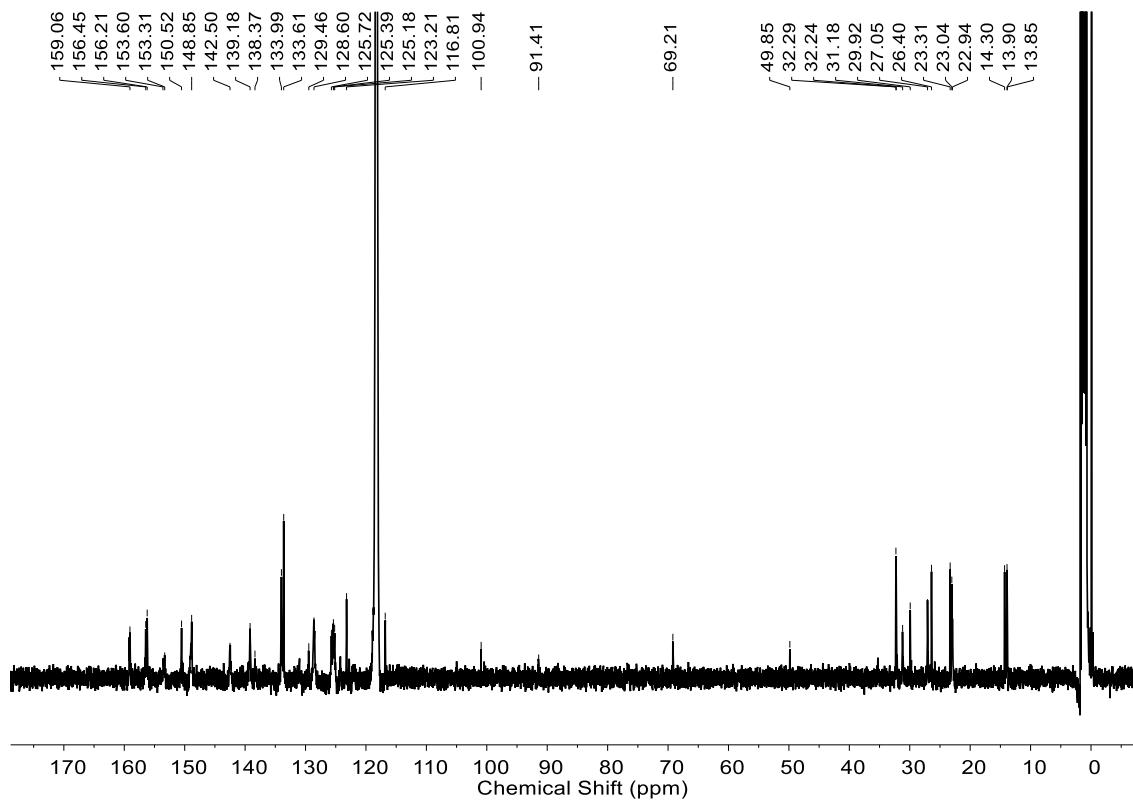

**Figure S101.**  $^{13}\text{C}$  NMR (125 MHz,  $\text{CD}_3\text{CN}$ ) spectrum of complex **G5**.

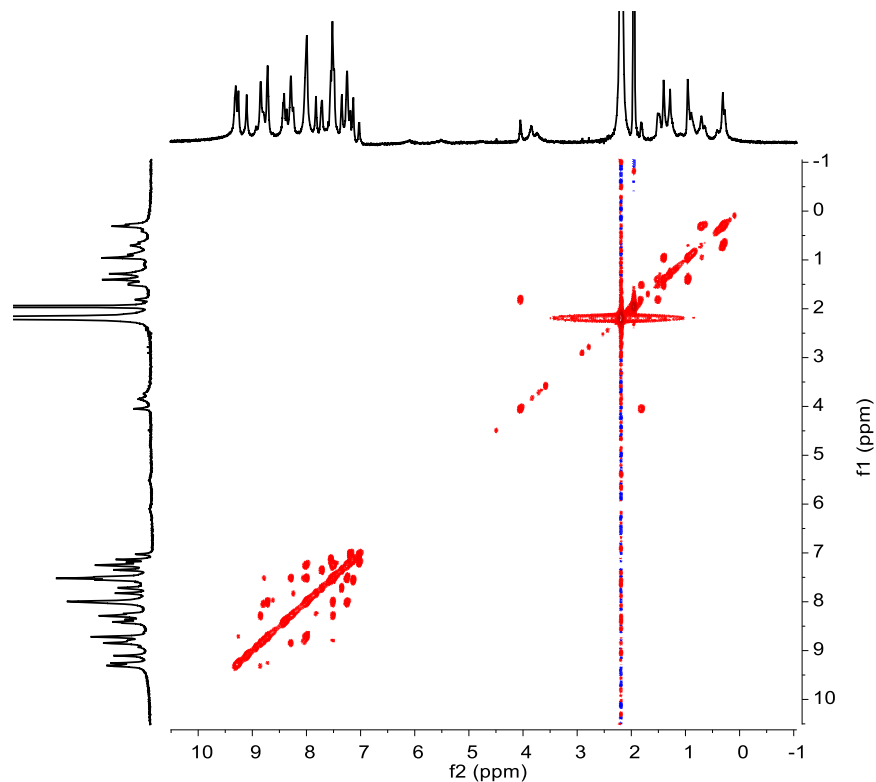

Figure S102. 2D COSY NMR (500 MHz, CD<sub>3</sub>CN) spectrum of complex G5.

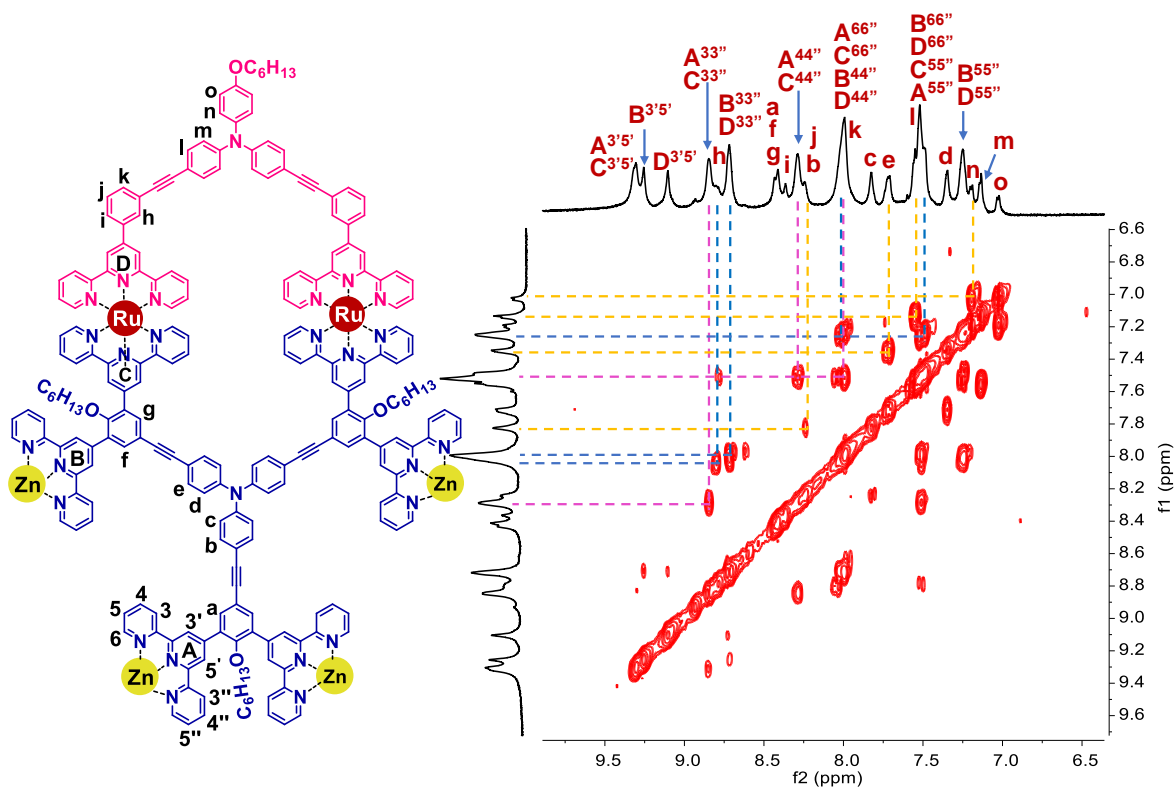

Figure S103. 2D COSY NMR (500 MHz, CD<sub>3</sub>CN) spectrum of complex G5 (aromatic region).

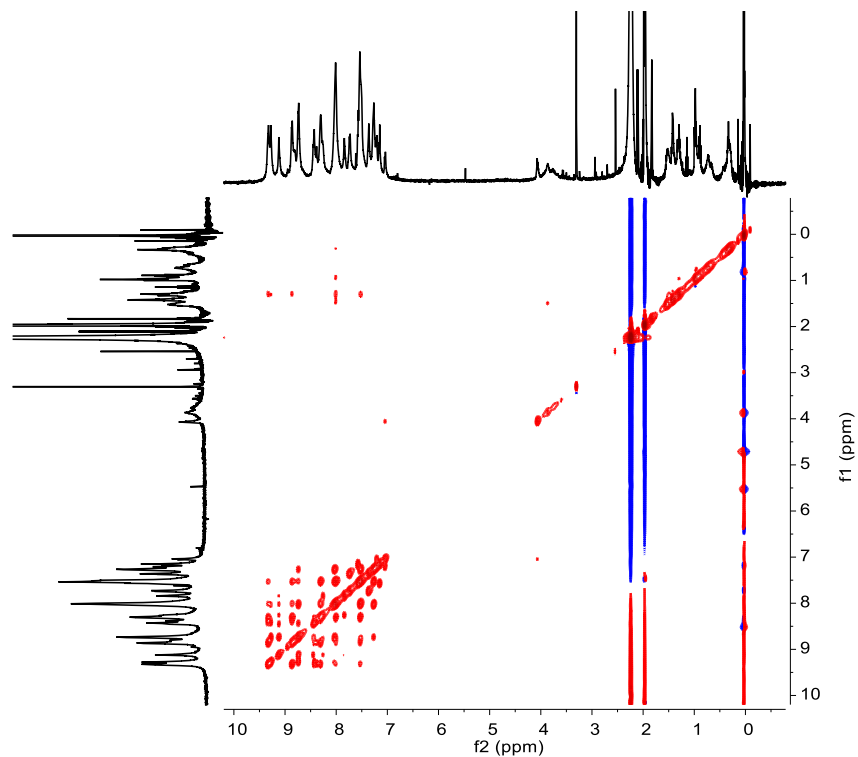

Figure S104. 2D NOESY NMR (500 MHz, CD<sub>3</sub>CN) spectrum of complex **G5**.

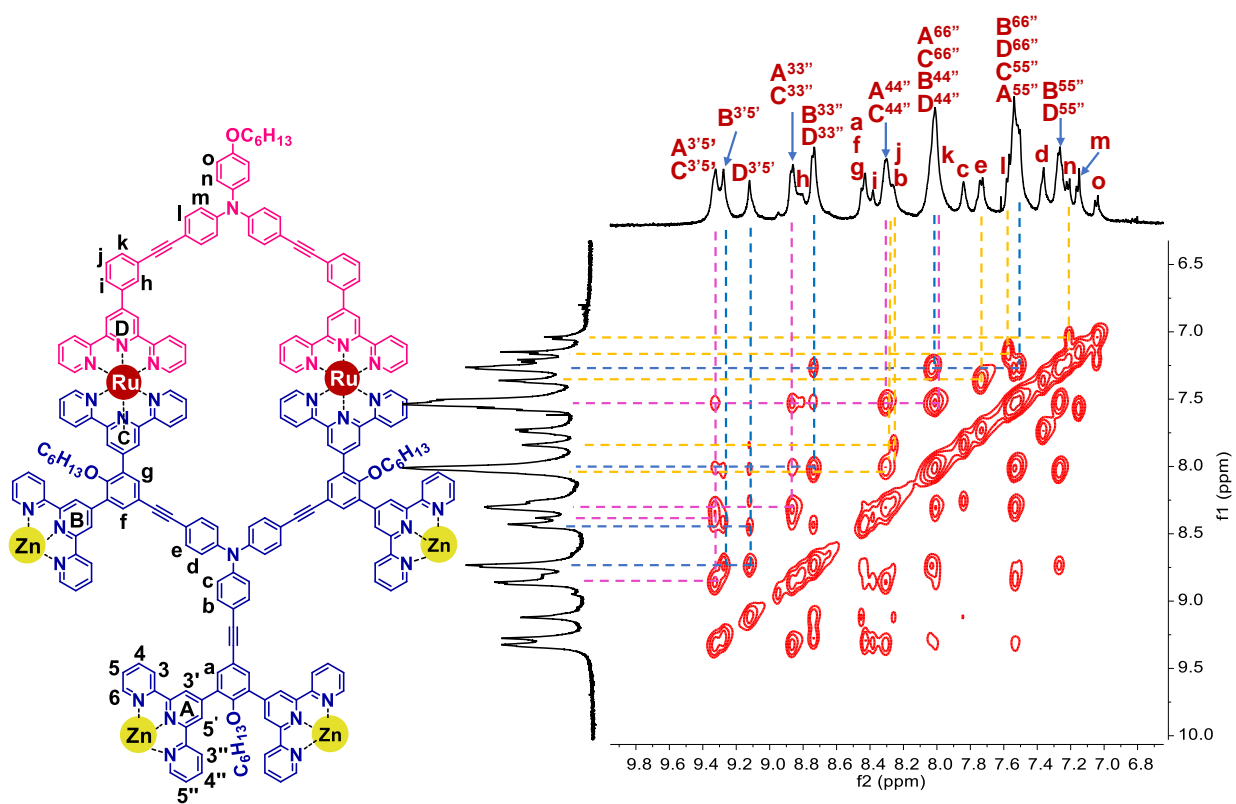

Figure S105. 2D NOESY NMR (500 MHz, CD<sub>3</sub>CN) spectrum of complex **G5** (aromatic region).

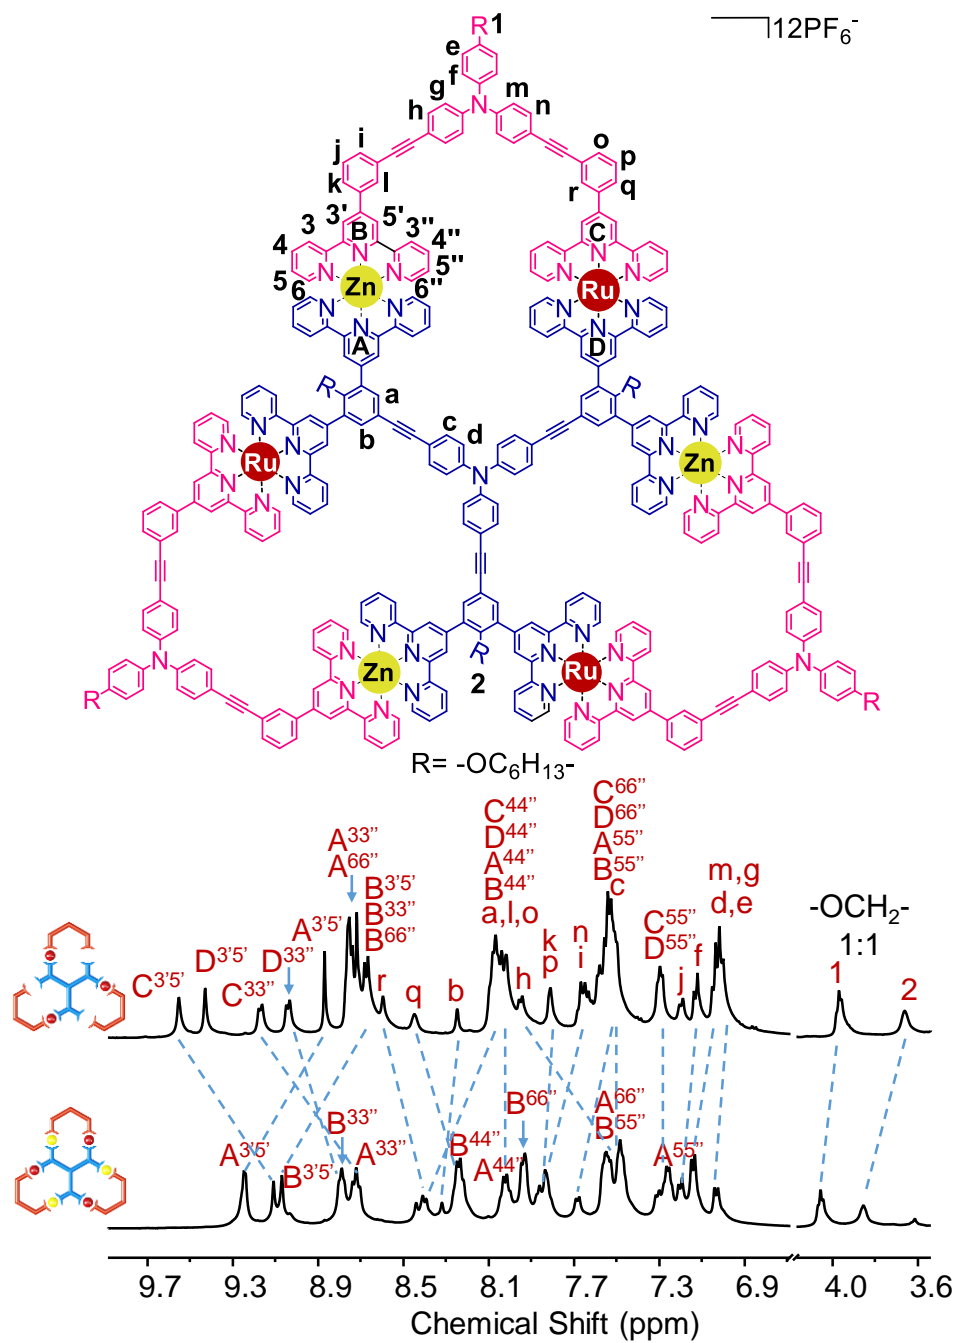

Figure S106.  $^1H$  NMR spectra (500 MHz, 300 K) of **LB** in  $DMSO-d_6$  and **G2** in  $CD_3CN$ .

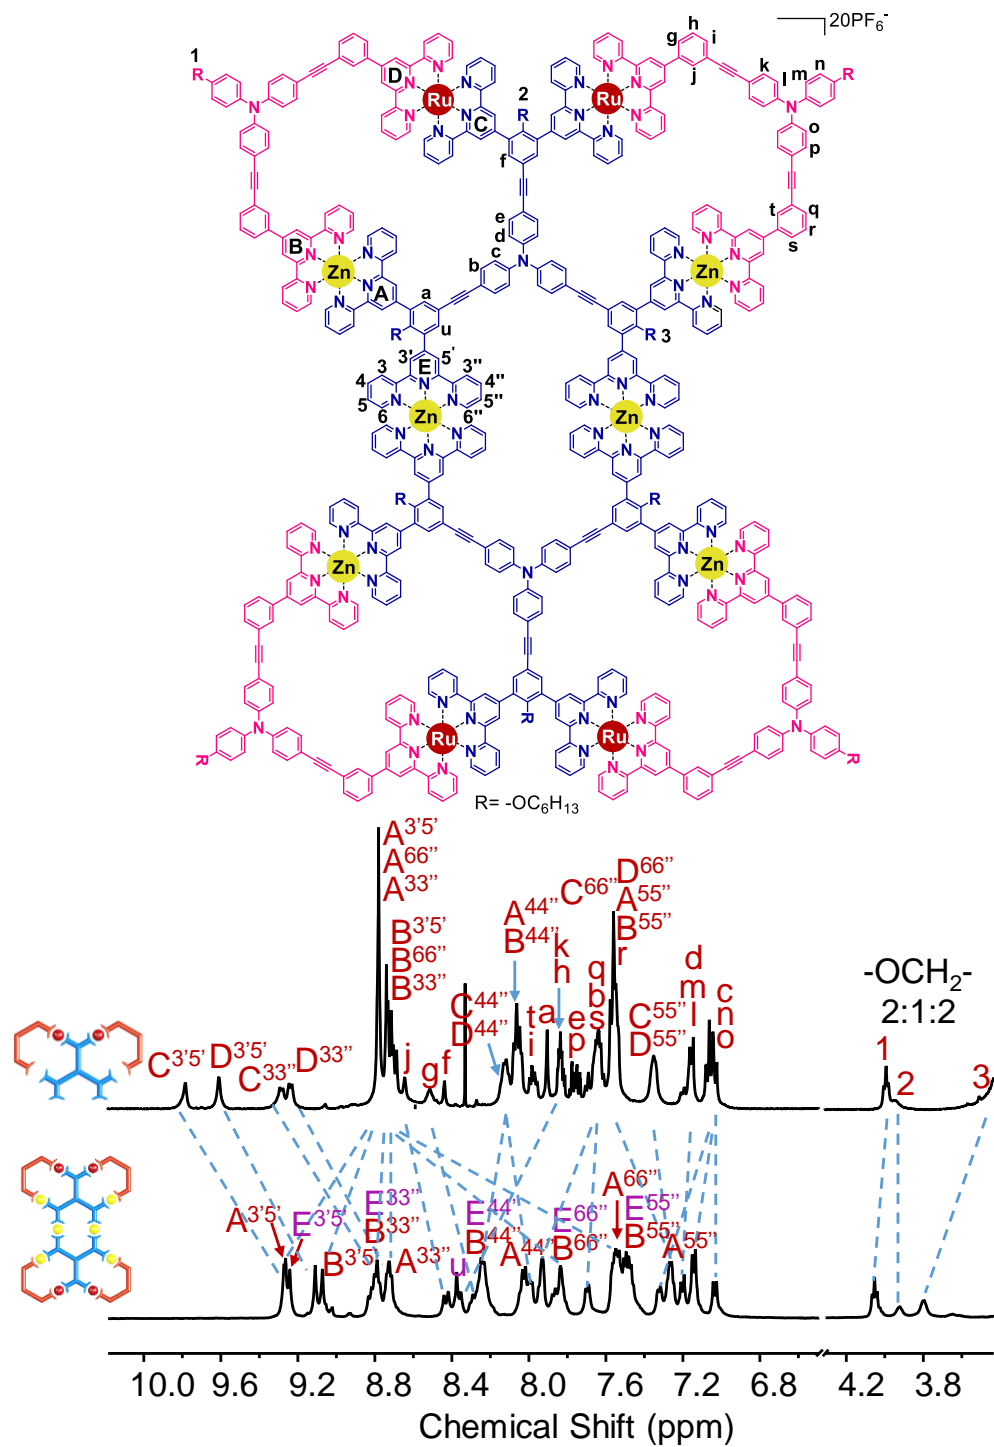

**Figure S107.**  $^1\text{H}$  NMR spectra (500 MHz, 300 K) of LC in  $\text{DMSO}-d_6$  and G3 in  $\text{CD}_3\text{CN}$ .



## 7. Experimental diffusion coefficient and hydrodynamic radius

**Table S1.** Experimental diffusion coefficient (D) and hydrodynamic radius ( $r_H$ )

| fractal   | $D_{\text{exp}}$ (m <sup>2</sup> /s) | Log D | $r_H$ (from D, nm) | $r$ (from modeling, nm) |
|-----------|--------------------------------------|-------|--------------------|-------------------------|
| <b>G1</b> | 4.99X10 <sup>-10</sup>               | -9.30 | 1.3                | 1.1                     |
| <b>G2</b> | 3.05X10 <sup>-10</sup>               | -9.52 | 2.4                | 2.5                     |
| <b>G3</b> | 2.63X10 <sup>-10</sup>               | -9.58 | 2.9                | 2.8                     |
| <b>G4</b> | 1.92X10 <sup>-10</sup>               | -9.62 | 4.2                | 3.5                     |
| <b>G5</b> | 1.46X10 <sup>-10</sup>               | -9.84 | 5.7                | 5.5                     |

**Note:** the  $r_H$  obtained from D adopted the oblate spheroid model.<sup>14-15</sup> See the supporting information of reference for detailed calculation process.<sup>16</sup>

## 8. TEM and STM images

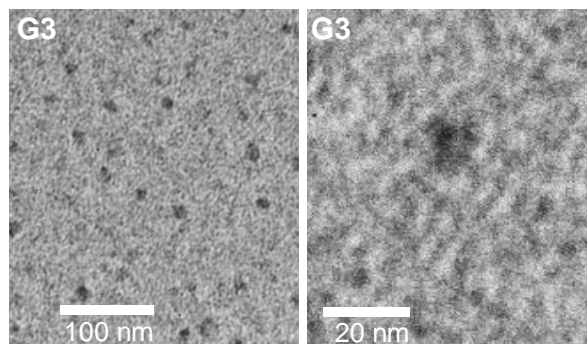

**Figure S108.** TEM images of **G3**.

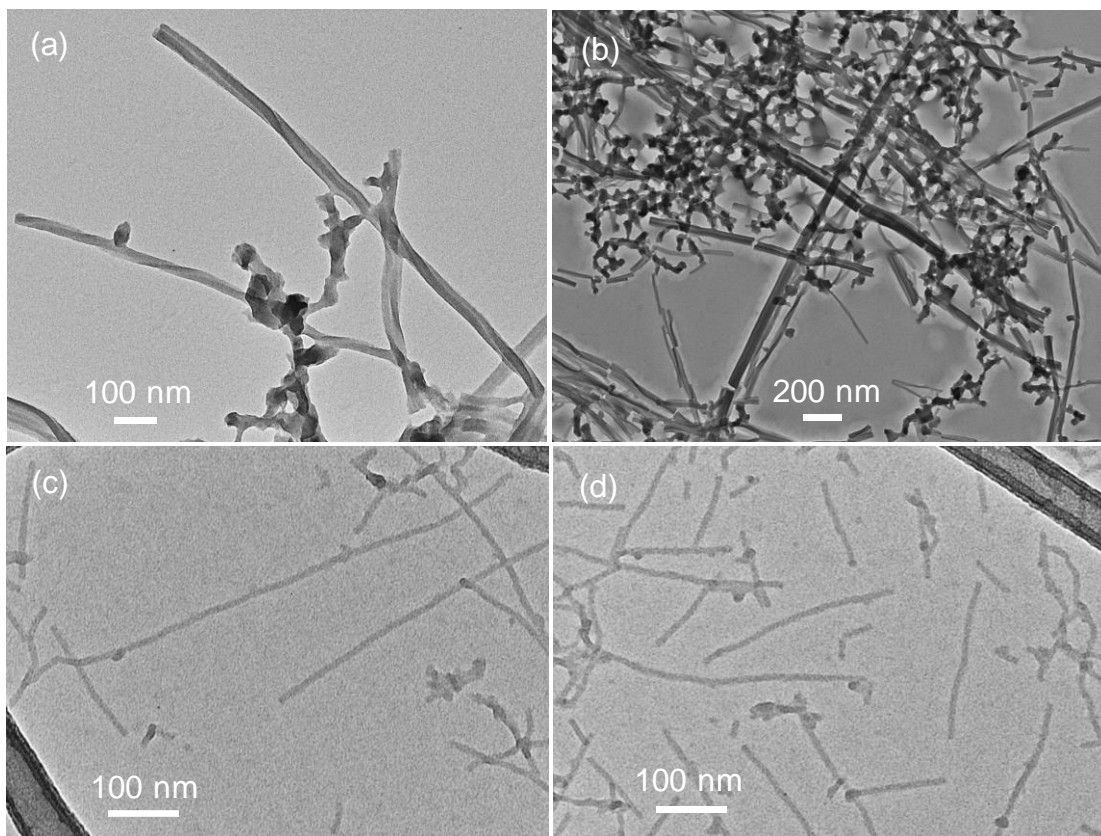

**Figure S109.** TEM images of tubular structure formed by **G4** (a, b) and **G5** (c, d).

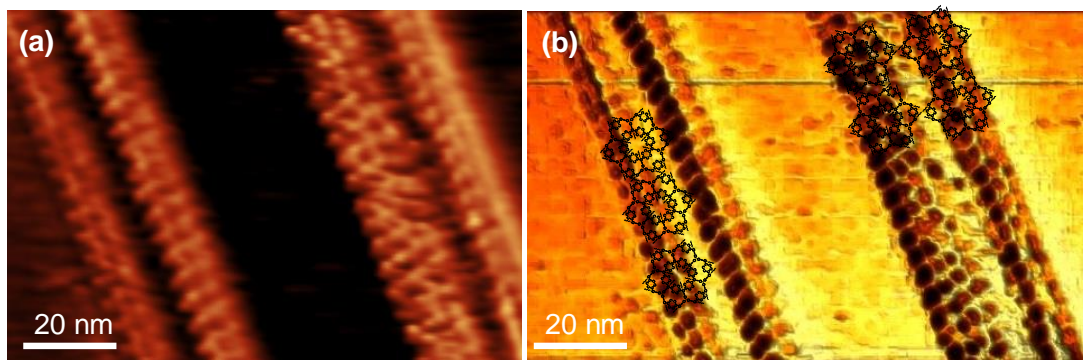

**Figure S110.** STM images of supramolecular metal-organic nanoribbons formed by **G4** on HOPG surface.

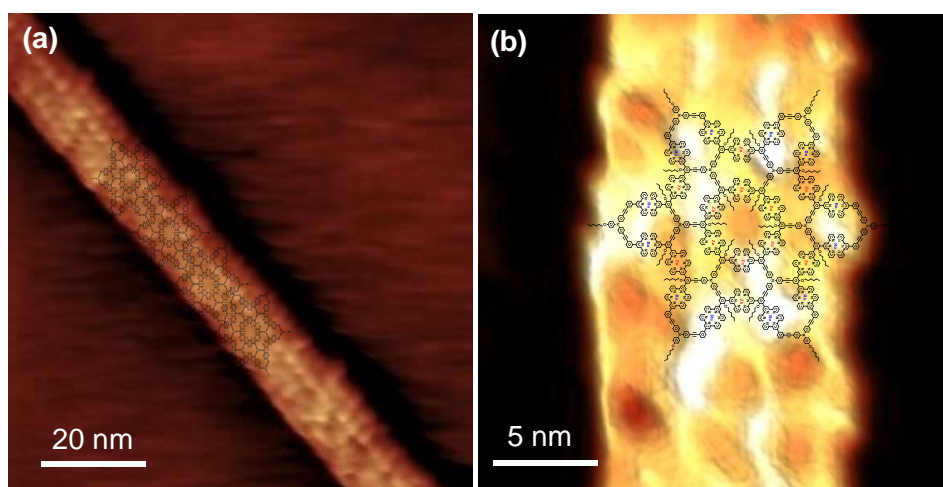

**Figure S111.** STM images of supramolecular metal-organic nanoribbons formed by **G5** on HOPG surface.

## 9. UV-Vis and CV spectra

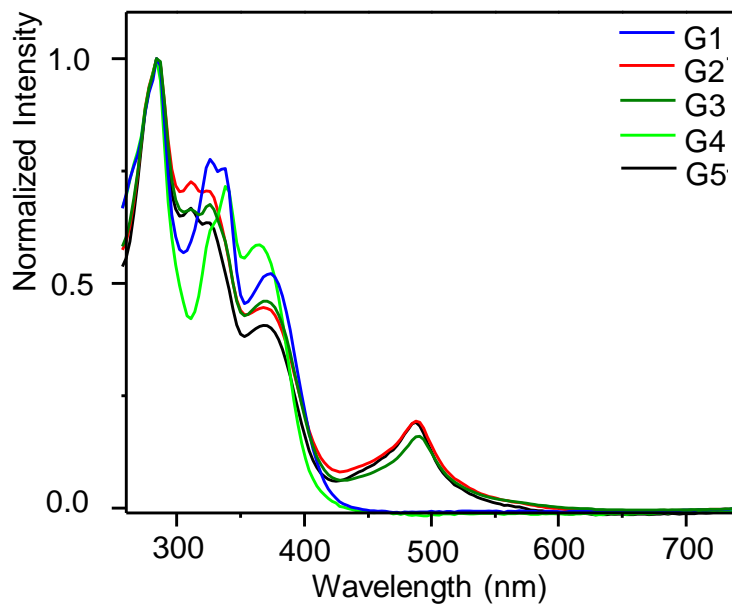

**Figure S112.** UV-vis ( $10^{-6}$  M in  $\text{CH}_3\text{CN}$ , 298 K) of fractals.

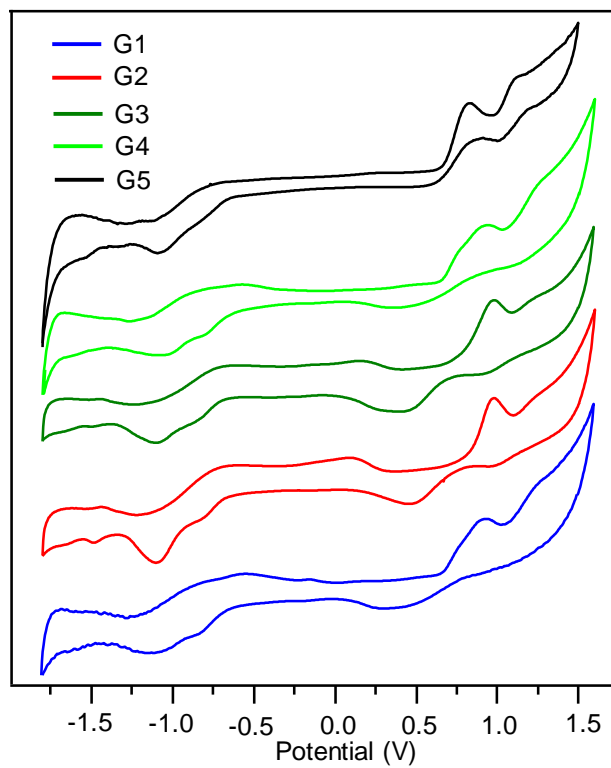

**Figure S113.** Cyclic voltammograms of five fractals ( $10^{-5}$  M in DMF with 0.1 M  $n\text{-Bu}_4\text{PF}_6$ , 298 K) at a scan rate of 100 mV/s.

## 10. Reference:

- (1) Patel, M. N.; Gandhi, D. S.; Parmar, P. A.; Joshi, H. N. *J. Coord. Chem.* **2012**, *65*, 1926.
- (2) Eryazici, I.; Newkome, G. R. *New J. Chem.* **2009**, *33*, 345.
- (3) Wang, M.; Wang, C.; Hao, X.-Q.; Liu, J.; Li, X.; Xu, C.; Lopez, A.; Sun, L.; Song, M.-P.; Yang, H.-B.; Li, X. *J. Am. Chem. Soc.* **2014**, *136*, 6664.
- (4) Wang, M.; Wang, K.; Wang, C.; Huang, M.; Hao, X.-Q.; Shen, M.-Z.; Shi, G.-Q.; Zhang, Z.; Song, B.; Cisneros, A. *J. Am. Chem. Soc.* **2016**, *138*, 9258.
- (5) Sharghi, H.; Nasser, M. A.; Niknam, K. *J. Org. Chem.* **2001**, *66*, 7287.
- (6) Wang, M.; Li, C.; Lv, A.; Wang, Z.; Bo, Z.; Zhang, F. *Polymer.* **2012**, *53*, 324.
- (7) Onitsuka, K.; Ohara, N.; Takei, F.; Takahashi, S. *Organometallics* **2008**, *27*, 25.
- (8) Goodbrand, H. B.; Hu, N.-X. *J. Org. Chem.* **1999**, *64*, 670.
- (9) Wang, L.; Yang, L.; Li, L.; Cao, D. *New J. Chem.* **2016**, *40*, 6706.
- (10) Singh, R.; Meena, J. S.; Wu, C.-S.; Ko, F.-H. *Phys. Chem. Chem. Phys.* **2015**, *17*, 5227.
- (11) Martin, F.-A.; Baudequin, C.; Fiol-Petit, C.; Darabantu, M.; Ramondenc, Y.; Plé, N. *Tetrahedron* **2014**, *70*, 2546.
- (12) Newkome, G. R.; Cho, T. J.; Moorefield, C. N.; Cush, R.; Russo, P. S.; Godínez, L. A.; Saunders, M. J.; Mohapatra, P., *Chem. Eur. J.* **2002**, *8*, 2946.
- (13) Gerken, J. B.; Rigsby, M. L.; Ruther, R. E.; Pérez-Rodríguez, R. J.; Guzei, I. A.; Hamers, R. J.; Stahl, S. S. *Inorg. Chem.* **2013**, *52*, 2796.
- (14) Giuseppone, N.; Schmitt, J.-L.; Allouche, L.; Lehn, J.-M., *Angew. Chem. Int. Ed.* **2008**, *47*, 2235.
- (15) Schulze, B. M.; Watkins, D. L.; Zhang, J.; Ghiviriga, I.; Castellano, R. K., *Org. Biomol. Chem.* **2014**, *12*, 7932.
- (16) Zhang, Z.; Wang, H.; Wang, X.; Li, Y.; Song, B.; Bolarinwa, O.; Reese, R. A.; Zhang, T.; Wang, X.-Q.; Cai, J.; Xu, B.; Wang, M.; Liu, C.; Yang, H.-B.; Li, X. *J. Am. Chem. Soc.* **2017**, *139*, 8174.
